# Supplementary material
Source: publisher figshare collection journal article supplement (https://gsapubs.figshare.com/articles/dataset/_/22762244)
Supplement: Supplementary file 1 [file 1]

## Sheet: Zircon U-Pb unknowns
	LA-ICP-MS U-Th-Pb Zircon Data for Needles Mountains region, CO, USA												Hillenbrand, I.W., Williams, M.L., Karlstrom, K.E., Gilmer, A.K., Lowers, H.A., Jercinovic, M.J., Suarez, K.A., and Souders, A.K., 2023, Monazite and xenotime petrochronologic constraints on four Proterozoic tectonic episodes and ca. 1705 Ma age of the Uncompahgre Formation, southwestern Colorado, USA: Geosphere, v. 19, https://doi.org/10.1130/GES02631.1.
	Laboratory / Instrumentation: Mineral Isotope Laser Laboratory (MILL), Texas Tech University / June 2022 / Nu Instruments AttoM single collector-magnetic sector-ICPMS / ESI NWR 193mn ArF excimer laser
	Data Acquisition Settings: 202Hg, 204Hg+Pb, 206, 207, 208Pb, 232Th, 235U, 238U on single SEM / 15 um ablation spots
						Concentrations1			Isotopic Ratios2												Dates (Ma)3
	Grain Number	Date/Time	Duration (s)	204Pb cps	206Pb cps	U ppm	Th ppm	U/Th	207Pb/235U	2s abs	206Pb/238U	2s abs	207Pb/206Pb	2s abs	Rho4	Rho5	238U/206Pb	2s abs	208Pb/232Th	2s abs	207Pb/235U	2sprop6	206Pb/238U	2sprop6	207Pb/206Pb	2sprop6	% Conc7	% Conc8	208Pb/232Th	2sprop6
	21IWH03
1	21IWH3B-48	2022-06-21 18:17:17	24	89.7852	1.85759e+06	1037.03	376.652	0.363201	4.70551	0.20928	0.314753	0.00509645	0.108565	0.00151342	0.513609	0.620101	3.18395	0.0512551	0.0930019	0.00402477	1767.7	37.1522	1763.65	24.9598	1772.61	25.2671	99.4944	99.771	1797.09	74.3818
2	21IWH3B-20	2022-06-21 18:24:09	18.877	147.599	2.21058e+06	1384.33	420.5	0.303757	4.70451	0.231166	0.314475	0.00855577	0.108776	0.00197206	0.842167	0.299443	3.20454	0.103452	0.102502	0.00496667	1767.11	45.2085	1760.28	42.3508	1773	33.4095	99.2827	99.6137	1971.07	90.7699
3	21IWH3B-17	2022-06-21 18:26:23	18.831	130.732	1.55598e+06	951.147	250.298	0.263154	4.40751	0.201206	0.298147	0.00539622	0.106853	0.0017963	0.50955	0.477346	3.35906	0.063538	0.0957298	0.00425277	1712.51	37.6068	1681.56	26.7924	1741.65	30.8002	96.5498	98.1932	1847.36	78.396
4	21IWH3B-16	2022-06-21 18:27:01	9.438	121.497	1.87631e+06	1187.86	286.22	0.240954	4.72395	0.218972	0.315523	0.00725203	0.109042	0.0023373	0.492584	0.59225	3.18209	0.0740016	0.100118	0.00501434	1770.63	37.9559	1767.09	35.5678	1778.41	38.7908	99.3634	99.8001	1927.83	91.9285
5	21IWH3B-13	2022-06-21 18:33:13	23.603	19.9475	1.74987e+06	1100.37	371.836	0.33792	4.67282	0.212187	0.309336	0.0056126	0.108743	0.00167904	0.693918	0.458261	3.24028	0.0602915	0.0979232	0.00446155	1761.06	37.4677	1736.71	27.567	1774.17	28.1842	97.8882	98.6171	1892.22	84.768
6	21IWH3B-23	2022-06-21 18:46:43	10.362	94.9992	1.88042e+06	1161.11	500.626	0.431161	4.56767	0.208594	0.30578	0.00548619	0.108029	0.00181133	0.499641	0.419117	3.26704	0.0542534	0.0951549	0.00458074	1742.69	38.4945	1723.31	24.8069	1763.53	30.3392	97.7196	98.8884	1836.63	84.2971
7	21IWH3B-24	2022-06-21 18:52:04	20.072	42.8982	2.15185e+06	1368.45	524.755	0.383468	4.71505	0.21281	0.314203	0.00606109	0.108504	0.00178655	0.577084	0.550797	3.19741	0.0629039	0.0958324	0.00433823	1768.96	38.0565	1760.52	29.768	1769.72	30.4639	99.4801	99.523	1849.07	80.0524
8	21IWH3B-4	2022-06-21 18:44:17	22.948	11.0299	743201	471.463	125.852	0.266938	4.2535	0.191044	0.293548	0.00515392	0.104294	0.00161844	0.492783	0.593996	3.41293	0.0622881	0.0914066	0.00404362	1683.56	36.7514	1658.67	25.6771	1697.57	28.5708	97.7085	98.5218	1767.43	74.7572
9	21IWH3B-47	2022-06-21 18:53:29	18.585	-33.9415	517431	310.012	61.932	0.199773	4.7144	0.217859	0.317274	0.00625141	0.10779	0.00179215	0.64622	0.409533	3.15936	0.0597732	0.094126	0.00444525	1768.14	38.5271	1775.54	30.5635	1757.78	30.7534	101.01	100.419	1817.32	82.1804
10	21IWH3B-46	2022-06-21 18:54:12	15.007	208.638	2.50707e+06	1645.51	529.167	0.321583	4.61875	0.211924	0.310255	0.00674797	0.108123	0.00195708	0.594591	0.636156	3.24084	0.072954	0.104356	0.00504756	1753.51	36.4249	1741	33.2938	1763.08	33.4152	98.7477	99.2868	2005.26	92.4585
11	21IWH3B-44	2022-06-21 18:55:51	11.681	219.969	1.63769e+06	1038.59	506.924	0.488088	4.68029	0.215026	0.310495	0.00667028	0.109625	0.00170182	0.829468	0.0776515	3.23318	0.0687618	0.0940132	0.00462262	1762.81	38.2503	1742.43	32.7277	1790.62	28.2865	97.3089	98.844	1815.38	85.01
12	21IWH3B-42	2022-06-21 18:57:11	16.934	137.506	1.8247e+06	1166.63	385.695	0.330606	4.73032	0.215128	0.312548	0.00617464	0.109613	0.00170674	0.686762	0.55784	3.21351	0.0652718	0.0951648	0.00425272	1771.57	38.6439	1752.45	30.4009	1789.58	28.4583	97.9255	98.921	1836.94	78.4957
13	21IWH3B-38	2022-06-21 19:03:55	13.158	81.8698	1.20707e+06	852.326	277.302	0.325347	4.16171	0.195876	0.280222	0.00528802	0.107458	0.00187477	0.609315	0.238226	3.56798	0.0620716	0.0876496	0.00408501	1667.77	36.0311	1592.07	26.6464	1757.29	33.8294	90.598	95.4608	1697.73	75.8586
14	21IWH3B-33	2022-06-21 19:12:07	14.636	236.623	1.49292e+06	1004.02	318.537	0.317261	4.25769	0.191211	0.287091	0.00512331	0.10757	0.00167936	0.516342	0.621766	3.49126	0.062488	0.0920402	0.00413984	1684.69	36.8076	1626.61	25.6569	1755.65	28.1154	92.65	96.5525	1779.25	76.6392
15	21IWH3B-32	2022-06-21 19:12:41	22.439	189.971	1.96372e+06	1504.08	555.216	0.369141	3.94984	0.248029	0.268758	0.012757	0.106737	0.00158665	0.975456	0.130028	3.97336	0.209452	0.0837516	0.00474743	1604.42	53.1978	1525.99	65.2788	1740.82	27.3188	87.6592	95.1116	1623.09	88.6314
16	21IWH3B-19	2022-06-21 18:24:53	22.902	1227.17	2.62377e+06	2038.82	823.459	0.403889	4.00744	0.189546	0.255835	0.00617566	0.113717	0.00176632	0.854082	0.491802	3.95194	0.092957	0.0890685	0.00519917	1632.85	37.8084	1467	31.5645	1855.4	28.2075	79.0666	89.8426	1721.33	95.6035
17	21IWH3B-18	2022-06-21 18:25:35	19.155	783.416	2.06747e+06	2855.79	1514.5	0.530326	2.04231	0.0971695	0.139089	0.00328499	0.106557	0.00192201	0.715953	0.39273	7.2512	0.168096	0.0493304	0.00248346	1127.92	32.3144	839.093	18.5451	1735.41	32.8885	48.3513	74.393	972.832	47.826
18	21IWH3B-15	2022-06-21 18:31:50	22.781	2792.78	461722	1842.9	681.848	0.369986	1.25753	0.072579	0.0512714	0.00157279	0.175686	0.00358237	0.911454	-0.421938	19.9465	0.642398	0.0515644	0.00465975	820.414	32.9512	322.158	9.64755	2603.79	34.8234	12.3727	39.2678	1011.8	89.3146
19	21IWH3B-14	2022-06-21 18:32:31	9.391	4369.73	550900	3477.48	2327.34	0.669261	0.883965	0.0410982	0.0318638	0.000720712	0.199534	0.003998	0.399252	0.630703	31.4999	0.714193	0.0207812	0.000979133	642.821	22.1085	202.191	4.50213	2825.11	36.2239	7.15693	31.4537	415.706	19.3796
20	21IWH3B-12	2022-06-21 18:33:57	16.748	825.472	365789	2441	1021.17	0.418343	0.504086	0.0233117	0.0302964	0.000574212	0.119578	0.00198129	0.522864	0.357117	33.1233	0.62295	0.0144403	0.000722096	415.064	16.559	192.393	3.59195	1945.93	29.5611	9.88695	46.3527	289.749	14.3786
21	21IWH3B-11	2022-06-21 18:34:40	7.343	445.841	559406	2811.34	933.164	0.331929	0.580737	0.0294147	0.0414082	0.000997307	0.100502	0.00247084	0.601389	0.380183	24.1042	0.647763	0.016312	0.000971262	464.545	18.7707	261.538	6.17061	1627.64	45.9401	16.0685	56.2998	326.998	19.3032
22	21IWH3B-10	2022-06-21 18:35:23	15.852	1953.12	2.35062e+06	2706.75	1325.63	0.489751	2.81002	0.126291	0.17478	0.00314058	0.115966	0.00202428	0.232323	0.690021	5.73588	0.10038	0.0608394	0.00279145	1357.71	33.6732	1038.21	17.1909	1890.48	31.416	54.9178	76.4678	1193.5	53.1193
23	21IWH3B-9	2022-06-21 18:36:06	24.793	160.79	989656	1318.57	416.294	0.315717	2.67593	0.261106	0.18371	0.0160308	0.1042	0.00166096	0.991585	-0.231512	7.8955	1.05175	0.0581172	0.00604688	1244.2	84.0171	1068.98	88.6465	1695.09	29.8091	63.0632	85.9169	1133.21	115.476
24	21IWH3B-8	2022-06-21 18:36:52	10.412	342.826	829674	2610.94	944.202	0.361633	0.957985	0.0460258	0.0651594	0.00141985	0.105413	0.0019663	0.718941	0.396875	15.4021	0.332137	0.0237071	0.00118114	681.674	23.5006	406.882	8.58803	1717.63	34.0877	23.6886	59.6887	473.529	23.3089
25	21IWH3B-7	2022-06-21 18:42:08	12.069	307.309	1.42234e+06	3654.68	2049.64	0.560826	1.1793	0.0552759	0.0828601	0.00197168	0.102867	0.00183731	0.711205	0.543187	12.1351	0.282323	0.0258732	0.0012562	790.392	25.6042	513.066	11.7225	1672.47	33.0656	30.677	64.9128	516.243	24.751
26	21IWH3B-6	2022-06-21 18:43:02	12.579	857.269	1.42889e+06	1260.28	449.452	0.356629	3.46358	0.184123	0.219617	0.00730849	0.113532	0.00172122	0.936374	0.232418	4.6231	0.164409	0.142837	0.00670812	1514.59	42.7458	1278.36	38.7981	1854.23	27.6584	68.9429	84.4029	2697.42	118.528
27	21IWH3B-5	2022-06-21 18:43:36	21.673	3106.2	1.98495e+06	3610.89	2525.35	0.69937	1.87347	0.0851792	0.10987	0.00197787	0.122775	0.00180502	0.678285	0.441032	9.10171	0.161677	0.0621779	0.00305851	1070.95	29.6035	671.879	11.4769	1996.07	27.2012	33.66	62.7364	1218.57	58.0353
28	21IWH3B-3	2022-06-21 18:44:59	6.563	138.326	1.52814e+06	2530.01	1017.83	0.402305	1.85888	0.0914023	0.124175	0.00384957	0.108512	0.0026721	0.668831	0.62726	8.04058	0.219123	0.0363364	0.00193682	1065.74	32.5492	754.308	22.0886	1769.67	43.7983	42.6241	70.7777	721.299	37.773
29	21IWH3B-2	2022-06-21 18:45:57	9.849	2373.85	2.41e+06	2519.66	1362	0.54055	2.99893	0.133366	0.182219	0.00322221	0.118838	0.00206504	0.288265	0.80322	5.49578	0.0949901	0.0592373	0.00270637	1407.18	33.6311	1078.97	17.5357	1941.12	28.5364	55.5849	76.6763	1163.06	51.596
30	21IWH3B-1	2022-06-21 18:47:16	24	442.231	2.11866e+06	1681.65	575.11	0.341992	3.98997	0.197039	0.263162	0.00794463	0.110025	0.00164211	0.935018	0.563623	3.88319	0.117465	0.0823035	0.0041952	1627.14	40.3333	1502.99	40.4492	1800.91	26.9328	83.4571	92.3699	1597.08	78.3178
31	21IWH3B-26	2022-06-21 18:52:50	19.345	900.846	752151	2119.37	1562.6	0.737296	1.2936	0.077702	0.0807399	0.00334541	0.115495	0.00188337	0.914014	0.0621536	12.7979	0.469369	0.0243755	0.0021449	836.711	32.848	499.877	19.8239	1883.29	29.4396	26.5428	59.7431	485.943	42.1615
32	21IWH3B-45	2022-06-21 18:55:09	9.068	379.82	737838	1390.24	528.201	0.379936	1.52005	0.0697278	0.101936	0.00198334	0.10794	0.00176106	0.646534	0.456904	9.8309	0.19652	0.038717	0.00193634	938.136	28.2872	625.689	11.6141	1762.49	29.6897	35.5004	66.695	767.667	37.6743
33	21IWH3B-43	2022-06-21 18:56:33	12.808	3356.73	534036	1347.71	700.129	0.519495	1.9548	0.0929684	0.0774023	0.0015777	0.183482	0.00340619	0.647432	0.325847	12.9666	0.267745	0.0519969	0.00251225	1098.9	32.0428	480.539	9.44111	2680.55	31.2901	17.9269	43.7289	1024.32	48.2395
34	21IWH3B-41	2022-06-21 19:01:47	20.749	1827.18	790762	1900.64	990.284	0.521028	1.57009	0.0705816	0.0875351	0.00145042	0.129761	0.00198632	0.423808	0.534402	11.4492	0.19151	0.0336501	0.00154052	958.005	27.7681	540.897	8.59921	2093.88	27.5151	25.8322	56.4608	668.845	30.0964
35	21IWH3B-40	2022-06-21 19:02:30	24	801.948	790295	1490.26	500.714	0.335991	1.64355	0.0885499	0.106488	0.00330799	0.111174	0.00185088	0.921184	-0.149276	9.59659	0.278375	0.0477362	0.00424124	981.422	33.6357	651.628	19.1766	1816.12	30.5701	35.8802	66.3963	938.697	81.0426
36	21IWH3B-39	2022-06-21 19:03:13	24	1044.33	1.45778e+06	1150.52	386.441	0.335885	3.99495	0.185473	0.254583	0.00603659	0.114113	0.00188421	0.78582	0.551636	3.96073	0.090951	0.095404	0.00440849	1632.73	36.6388	1460.59	30.9577	1860.48	30.0022	78.5061	89.4572	1840.85	81.1309
37	21IWH3B-37	2022-06-21 19:04:39	24	3597.9	2.38514e+06	2615.87	1036.44	0.396212	3.23199	0.390808	0.181026	0.0154217	0.12176	0.00239282	0.974674	-0.40057	5.97914	0.367269	0.0773153	0.00847818	1397.38	65.1203	1035.88	60.4628	1983.24	33.9375	52.2317	74.1298	1490.2	151.38
38	21IWH3B-36	2022-06-21 19:05:39	6.114	1505.89	2.03579e+06	1764.36	820.866	0.465249	3.53088	0.171908	0.222856	0.00454371	0.114192	0.00248397	0.743147	-0.0541222	4.49452	0.0916375	0.0840178	0.00440064	1533.17	38.4356	1296.77	23.9479	1863.63	39.5033	69.5832	84.5811	1630.16	82.0933
39	21IWH3B-35	2022-06-21 19:06:04	8.283	273.884	743466	962.541	338.749	0.351931	2.27464	0.106249	0.150794	0.00313576	0.109235	0.00213895	0.494004	0.473157	6.6484	0.141656	0.040607	0.0022606	1203.81	33.0513	905.277	17.5862	1783.03	35.5769	50.7719	75.2007	804.314	43.8566
40	21IWH3B-34	2022-06-21 19:06:57	9.05	983.372	3.99766e+06	2959	2207.82	0.746139	3.92424	0.181826	0.267251	0.00575713	0.106315	0.00193905	0.602545	0.551907	3.75329	0.0824451	0.076405	0.00346679	1617.92	37.4073	1526.4	29.3287	1733.88	33.3061	88.0337	94.3436	1487.97	65.029
41	21IWH3B-31	2022-06-21 19:13:39	8.976	665.242	1.98066e+06	2117.76	1497.34	0.707041	2.63165	0.126465	0.175026	0.00411184	0.109058	0.00211599	0.678515	0.342608	5.73618	0.134779	0.0501306	0.00254962	1308.39	35.8344	1039.46	22.5454	1779.94	35.288	58.3986	79.4458	988.453	49.0231
42	21IWH3B-30	2022-06-21 19:14:23	8.699	213.465	587437	1917.23	1180.25	0.615601	0.8395	0.0396216	0.0581129	0.00137621	0.105395	0.00193361	0.729584	0.28588	17.2731	0.389269	0.0214393	0.00100127	618.531	21.7329	364.101	8.37016	1717.91	33.848	21.1944	58.8653	428.734	19.8116
43	21IWH3B-29	2022-06-21 19:15:05	8.68	1039.41	713187	1248.13	363.765	0.291447	1.79453	0.0824815	0.107852	0.00245027	0.120857	0.00225459	0.586246	0.647051	9.30405	0.209105	0.0560985	0.00263115	1043.05	30.1223	660.157	14.2448	1965.61	33.5227	33.5854	63.2909	1103.07	50.3417
44	21IWH3B-28	2022-06-21 19:15:35	22.458	37.9485	915129	1481.94	676.141	0.456254	1.84617	0.257645	0.128063	0.0162596	0.102387	0.0018944	0.989832	-0.383528	11.3407	1.08165	0.0357344	0.00527848	968.974	83.2974	758.873	90.0714	1660.34	33.9651	45.7058	78.3172	702.957	101.638
45	21IWH3B-25	2022-06-21 18:16:33	24	321.16	545339	1519.43	519.79	0.342096	0.952765	0.0490031	0.0679377	0.00196547	0.10179	0.00160833	0.900431	0.0670795	15.0181	0.449998	0.0246682	0.00129408	676.9	25.755	423.466	11.8671	1654.93	30.2441	25.5881	62.5595	492.368	25.523
46	21IWH3B-27	2022-06-21 18:22:00	9.857	108.027	363360	2294.48	746.517	0.325353	0.376941	0.0179377	0.0311535	0.000748595	0.0880077	0.00192151	0.553736	0.533417	32.2509	0.771368	0.0128759	0.000694209	324.627	13.2463	197.749	4.679	1376.81	41.1257	14.3629	60.9159	258.565	13.8484
47	21IWH3B-22	2022-06-21 18:22:43	23.617	419.302	1.34213e+06	1301.63	398.625	0.306251	2.96984	0.146117	0.197525	0.00529228	0.109215	0.00166141	0.904185	0.310955	5.14382	0.14072	0.0799482	0.00376553	1395.77	37.4986	1160.65	28.4974	1782.31	27.7475	65.1204	83.1546	1553.77	70.3945
48	21IWH3B-21	2022-06-21 18:23:29	20.127	4015.67	1.35849e+06	1837.62	634.932	0.345518	2.75465	0.251822	0.139399	0.0133864	0.145075	0.00283357	0.991443	0.489415	7.86977	0.494771	0.0947833	0.00809023	1337.07	64.1779	831.349	70.6047	2281.43	34.2946	36.4399	62.177	1820.09	146.432
	21IWH04
1	21IWH04-z1	2022-06-20 17:35:09	24	203.266	144590	100.972	24.8069	0.245681	4.22001	0.123715	0.29514	0.00462855	0.103787	0.00125523	0.591274	0.399663	3.40423	0.053284	0.0857353	0.00308286	1676.17	23.8286	1666.37	23.0067	1690.47	22.7985	98.5743	99.4157	1660.41	57.8873
2	21IWH04-z2	2022-06-20 17:35:52	24	17.2811	410399	280.814	67.9029	0.241807	4.31348	0.119856	0.304775	0.00441232	0.102431	0.00105767	0.604549	0.636527	3.28295	0.0476767	0.089377	0.00189559	1695.03	22.84	1716.84	22.7044	1669.71	19.0647	102.822	101.287	1729.67	35.1722
3	21IWH04-z3	2022-06-20 17:36:35	24	38.7408	414363	285.613	93.3678	0.326903	4.38592	0.125468	0.30636	0.00435836	0.103993	0.000938637	0.742202	0.241017	3.27526	0.0464058	0.0910571	0.0018583	1708.3	23.5995	1722.17	21.4799	1693.49	16.7394	101.693	100.811	1760.87	34.3888
4	21IWH04-z4	2022-06-20 17:37:18	24	52.83	168355	115.417	32.3194	0.280024	4.39913	0.124071	0.307321	0.0040684	0.104405	0.00116659	0.505897	0.470799	3.26244	0.0433316	0.0884708	0.00226461	1711.01	23.425	1727.04	20.0537	1699.3	20.7248	101.633	100.937	1712.45	41.9849
5	21IWH04-z5	2022-06-20 17:42:04	24	103.04	223122	159.281	37.756	0.23704	4.24159	0.120405	0.298079	0.0041653	0.103893	0.00119416	0.656305	0.241714	3.36557	0.0469914	0.0883386	0.00223642	1680.86	23.3521	1681.23	20.6656	1690.04	21.1457	99.4789	100.022	1710.02	41.4762
6	21IWH04-z8	2022-06-20 17:44:13	24	51.0203	140485	99.5217	25.77	0.258939	4.31234	0.124704	0.301555	0.00431948	0.10405	0.00129035	0.36542	0.662686	3.32808	0.0489256	0.087735	0.00233048	1694.15	23.9125	1698.41	21.4377	1692.02	23.0641	100.377	100.251	1698.7	43.1845
7	21IWH04-z9	2022-06-20 17:44:56	24	50.4056	460517	317.961	70.3353	0.221207	4.46048	0.124773	0.312464	0.00391505	0.104077	0.00110315	0.491378	0.331839	3.20695	0.0401099	0.091525	0.00204771	1722.62	23.2064	1752.44	19.2133	1694	19.3464	103.45	101.732	1769.35	37.8514
8	21IWH04-z10	2022-06-20 17:45:39	24	83.9597	226136	160.912	37.0682	0.230363	4.32592	0.120679	0.299084	0.00418659	0.105199	0.0010596	0.596155	0.281465	3.34905	0.0454922	0.0890219	0.0022053	1697.33	23.0046	1686.21	20.7815	1714.04	18.6723	98.3765	99.3449	1722.75	40.9344
9	21IWH04-z12	2022-06-20 17:47:05	24	7.60048	270222	190.231	46.546	0.244682	4.28783	0.120043	0.301658	0.00391516	0.103502	0.00106364	0.654427	-0.0112446	3.32291	0.0427346	0.0899098	0.00216901	1689.99	23.1324	1699.11	19.3565	1683.99	18.8541	100.898	100.539	1739.27	40.1698
10	21IWH04-z13	2022-06-20 17:51:59	24	140.691	261429	184.329	48.4442	0.262814	4.29128	0.119186	0.302361	0.00426481	0.103296	0.00109085	0.523557	0.558352	3.31837	0.047146	0.0883468	0.00222121	1690.78	22.8891	1702.43	21.1132	1680.05	19.6768	101.332	100.689	1710.19	41.1973
11	21IWH04-z16	2022-06-20 17:54:07	24	6.63993	473852	332.272	69.4082	0.20889	4.41457	0.121549	0.306413	0.00383306	0.104616	0.000924021	0.57438	0.410876	3.27025	0.0409797	0.0893234	0.00191453	1714.29	22.7698	1722.67	18.909	1704.65	16.2119	101.057	100.489	1728.65	35.522
12	21IWH04-z17	2022-06-20 17:54:50	24	24.0895	151569	106.123	20.952	0.197432	4.34135	0.124942	0.305095	0.00445722	0.103403	0.00115046	0.599728	0.430273	3.2901	0.0485211	0.0893935	0.00256094	1699.77	23.6592	1715.86	22.0177	1684.12	21.0583	101.885	100.946	1729.21	47.5192
13	21IWH04-z19	2022-06-20 17:56:16	24	46.2612	652263	464.405	101.574	0.218717	4.42672	0.121572	0.307469	0.0037228	0.104242	0.000880518	0.55818	0.383331	3.25441	0.0377425	0.0913824	0.00172563	1716.61	22.6593	1727.93	18.3369	1698.28	15.5038	101.746	100.659	1767.01	31.9062
14	21IWH04-z20	2022-06-20 17:56:59	24	8.26534	175185	124.835	26.3756	0.211284	4.30075	0.125402	0.302706	0.00437997	0.10282	0.00115126	0.606547	0.29428	3.31579	0.0489315	0.0888815	0.00227777	1691.81	24.0178	1704.08	21.7053	1673.79	21.4873	101.81	100.725	1720.06	42.2378
15	21IWH04-z21	2022-06-20 18:02:19	24	40.7606	585063	420.545	106.34	0.252863	4.38362	0.120203	0.306602	0.00377603	0.103483	0.000877416	0.608639	0.419045	3.26772	0.0399398	0.0911695	0.00179584	1708.54	22.6757	1723.63	18.6073	1684.79	15.5722	102.305	100.883	1763.01	33.2184
16	21IWH04-z22	2022-06-20 18:03:02	24	91.6324	183798	132.55	30.5634	0.23058	4.31015	0.12087	0.298797	0.00388112	0.104202	0.00115694	0.435287	0.457522	3.34645	0.0433863	0.0893233	0.00225178	1694.24	23.1101	1684.93	19.271	1695.77	20.5447	99.3605	99.4502	1728.29	41.7693
17	21IWH04-z24	2022-06-20 18:04:28	24	2.55883	610968	438.753	107.817	0.245735	4.35046	0.118209	0.304025	0.00375918	0.103464	0.000877008	0.582285	0.405329	3.29554	0.0404779	0.0919536	0.00183243	1702.4	22.5576	1710.9	18.5605	1686.42	15.0904	101.451	100.499	1777.5	33.909
18	21IWH04-z25	2022-06-20 18:05:11	24	-9.20363	263823	190.432	47.364	0.248719	4.30973	0.121162	0.300528	0.00403574	0.103578	0.00101126	0.585316	0.380746	3.33201	0.0440415	0.0894102	0.00183018	1694.11	23.3409	1693.45	20.046	1685.67	18.016	100.462	99.9609	1730.34	33.9651
19	21IWH04-z26	2022-06-20 18:05:54	24	33.8207	229156	164.3	50.5898	0.307911	4.30268	0.122972	0.302986	0.00437248	0.102636	0.00118427	0.51284	0.454258	3.31248	0.048257	0.089737	0.00209325	1692.51	23.5617	1705.47	21.6406	1670.12	22.182	102.117	100.766	1736.15	38.7895
20	21IWH04-z27	2022-06-20 18:06:37	24	46.7427	78307.2	56.8263	11.8554	0.208625	4.35503	0.131794	0.29698	0.00422257	0.10568	0.00154636	0.339971	0.336467	3.37876	0.0481588	0.094219	0.00360022	1701.5	24.8156	1675.74	20.9775	1722.33	27.5703	97.2948	98.4858	1816.98	66.4203
21	21IWH04-z30	2022-06-20 18:12:55	24	57.2586	202050	145.854	41.2881	0.283077	4.26629	0.121185	0.29563	0.00440641	0.104425	0.00109025	0.619264	0.47675	3.39106	0.0504844	0.0870465	0.00208368	1685.63	23.2176	1671.31	22.5847	1700.2	19.371	98.3006	99.1501	1686.17	38.717
22	21IWH04sm-2	2022-06-21 17:47:36	20.945	108.905	405267	240.104	55.81	0.232441	4.21459	0.192496	0.296454	0.00591818	0.103028	0.00160913	0.691524	0.514236	3.37623	0.0622355	0.0903599	0.00418611	1675.48	37.6495	1672.78	29.4136	1678.15	27.8707	99.6803	99.8391	1747.74	77.5748
23	21IWH04sm-4	2022-06-21 17:48:59	23.603	79.2355	973035	571.558	135.636	0.23731	4.29305	0.191261	0.299664	0.00517943	0.103926	0.00158407	0.581446	0.622243	3.34768	0.0575815	0.0916429	0.0040248	1691.46	36.612	1689.1	25.6536	1691.28	27.9144	99.871	99.8601	1771.85	74.4953
24	21IWH04sm-5	2022-06-21 17:53:53	24.058	55.699	257957	153.667	34.4062	0.223901	4.25903	0.19649	0.299221	0.00614891	0.103578	0.00164789	0.849206	0.264295	3.36497	0.0685266	0.0924288	0.00437512	1683.47	37.9291	1686.26	30.3935	1684.3	29.2791	100.116	100.166	1785.71	80.5669
25	21IWH04sm-6	2022-06-21 17:54:37	18.771	-17.3549	176761	109.459	27.0864	0.247457	4.15282	0.194343	0.291642	0.00599589	0.10341	0.00195486	0.586464	0.351771	3.44782	0.0718515	0.0900954	0.0043315	1662.74	38.2211	1648.83	29.9282	1679.35	35.1058	98.1828	99.1639	1742.66	80.1722
26	21IWH04sm-7	2022-06-21 17:55:20	23.417	56.1872	171236	101.547	23.6522	0.232918	4.24634	0.194514	0.299014	0.00619005	0.102654	0.00174964	0.549224	0.613512	3.3528	0.0676588	0.0929226	0.00460491	1681.37	37.5792	1685.24	30.6109	1673.62	32.2528	100.694	100.23	1794.39	85.0947
27	21IWH04sm-8	2022-06-21 17:56:04	21.605	-9.94654	242271	140.8	26.7748	0.190161	4.33249	0.202137	0.30317	0.0058135	0.103964	0.00175333	0.458943	0.204196	3.3148	0.0657142	0.0934422	0.00463575	1697.3	38.5997	1706.17	28.8268	1690.55	31.4166	100.924	100.522	1810.94	82.4302
28	21IWH04sm-9	2022-06-21 17:56:48	10.501	131.879	1.07306e+06	669.333	114.427	0.170957	4.20645	0.195181	0.295169	0.00582025	0.103608	0.0021494	0.312758	0.554675	3.39665	0.068438	0.0991973	0.00475855	1674.32	38.1059	1666.88	29.0243	1684.64	38.0182	98.9459	99.5555	1911.07	87.4273
29	21IWH04sm-10	2022-06-21 17:57:29	11.523	94.7689	370265	226.159	46.108	0.203874	4.3024	0.211518	0.299247	0.00766206	0.104553	0.00227103	0.700941	0.368738	3.34898	0.0910738	0.0969274	0.00507039	1695.2	43.6332	1686.45	37.9028	1700.13	40.2064	99.1951	99.4833	1868.75	93.5292
30	21IWH04sm-11	2022-06-21 17:58:12	13.335	75.8338	322508	197.149	50.0495	0.253866	4.21651	0.198928	0.296736	0.00635019	0.10337	0.00202421	0.540971	0.413361	3.38524	0.0742509	0.089882	0.00439288	1675.6	38.838	1674.36	31.6195	1679.89	36.6307	99.6707	99.9259	1738.9	81.4594
31	21IWH04sm-12	2022-06-21 17:58:55	23.221	77.2505	561575	335.289	73.9367	0.220516	4.28463	0.193913	0.299783	0.00519961	0.103551	0.00149717	0.652722	0.392977	3.34176	0.0593216	0.0893977	0.00404864	1689.24	37.1997	1689.69	25.7473	1685.42	26.5232	100.253	100.026	1730.02	75.0024
32	21IWH04sm-14	2022-06-21 18:02:39	23.221	36.8415	422285	247.579	60.9122	0.246031	4.25354	0.194532	0.299198	0.00543148	0.103678	0.00150755	0.658308	0.318905	3.35581	0.0611077	0.0909292	0.0040829	1682.83	37.5549	1686.64	26.9407	1687.6	26.6171	99.9431	100.226	1758.46	75.5786
33	21IWH04sm-15	2022-06-21 18:03:22	23.221	69.1012	474533	284.519	100.592	0.353552	4.27077	0.194497	0.298621	0.00528698	0.103762	0.00165134	0.570586	0.342068	3.35461	0.0568615	0.0900975	0.00400349	1686.35	37.0259	1686.17	25.2901	1687.7	29.3502	99.9098	99.9897	1743.14	74.0773
34	21IWH04sm-16	2022-06-21 18:04:05	23.092	18.054	281404	166.629	38.1095	0.228709	4.24114	0.194578	0.29516	0.00579285	0.104703	0.00173382	0.637096	0.428849	3.39922	0.0629896	0.0916358	0.00426502	1681.77	39.2067	1666.32	28.7684	1703.63	30.5835	97.8102	99.0814	1771.24	78.7831
35	21IWH04sm-17	2022-06-21 18:04:48	23.138	60.9171	180072	105.977	26.8919	0.253753	4.19197	0.196406	0.295209	0.00621928	0.102852	0.00179913	0.644971	0.401089	3.40538	0.0737994	0.0939037	0.00452001	1669.91	38.2662	1666.29	30.901	1673.02	33.3454	99.5976	99.7831	1812.83	83.426
36	21IWH04sm-19	2022-06-21 18:06:14	22.524	24.7259	468521	269.125	78.6453	0.292226	4.26728	0.198032	0.300635	0.00620618	0.102918	0.00167888	0.705351	0.403561	3.33367	0.0659649	0.0875813	0.00425745	1686.75	36.5325	1693.32	30.5832	1675.35	29.514	101.072	100.389	1695.75	79.1198
37	21IWH04sm-20	2022-06-21 18:06:57	22.664	41.0452	335086	193.011	51.0647	0.264568	4.29201	0.195297	0.301734	0.00594414	0.103405	0.00168225	0.613812	0.579151	3.32585	0.0640027	0.0911848	0.00414467	1690.47	37.2606	1698.93	29.4479	1681.02	30.094	101.065	100.5	1763.11	76.7612
38	21IWH04sm-21	2022-06-21 18:12:14	22.628	96.7288	188806	111.159	26.363	0.237166	4.22055	0.198367	0.292917	0.0062962	0.104611	0.00178882	0.719575	0.391945	3.44053	0.0749432	0.0928707	0.00448298	1675.43	38.1287	1654.82	31.3919	1701.59	31.3651	97.2514	98.77	1793.75	83.0092
39	21IWH04sm-22	2022-06-21 18:12:58	19.468	108.577	278670	163.955	31.5081	0.192175	4.20895	0.194459	0.294182	0.00606272	0.10412	0.00172139	0.698252	0.398455	3.41838	0.06968	0.0950219	0.00456386	1675.99	39.7394	1661.45	30.1303	1694.14	30.4742	98.0708	99.1328	1833.67	84.2975
40	21IWH04sm-23	2022-06-21 18:13:41	23.175	38.6471	771450	446.709	79.8246	0.178695	4.26754	0.190895	0.297964	0.00533929	0.10401	0.00158835	0.533755	0.623769	3.36273	0.0577625	0.0926924	0.0041296	1686.42	36.6259	1680.56	26.5001	1692.71	28.459	99.2822	99.6528	1791.15	76.3296
41	21IWH04sm-24	2022-06-21 18:14:23	23.221	64.1885	379879	219.518	29.9868	0.136603	4.23667	0.194494	0.296121	0.00606439	0.104203	0.00174771	0.643557	0.48724	3.39962	0.0700881	0.0906713	0.00431002	1679.42	37.7038	1670.93	30.1522	1697.95	29.8346	98.4087	99.4945	1753.2	79.6613
42	21IWH04sm-25	2022-06-21 18:15:07	23.314	60.4031	243546	141.754	41.0181	0.289361	4.13188	0.194598	0.290694	0.00638041	0.103527	0.00177261	0.730055	0.291674	3.46112	0.0735653	0.0921762	0.00432976	1657.79	38.9315	1643.61	31.8171	1682.05	32.0704	97.7145	99.1442	1781.14	79.9821
43	21IWH04sm-1	2022-06-21 17:47:09	5.612	554.981	516355	447.441	96.769	0.216272	3.07551	0.141586	0.19356	0.0048379	0.115082	0.00289036	0.172592	0.79531	5.18131	0.127659	0.118865	0.0064793	1426.24	35.1009	1140.38	26.0916	1876.57	46.3368	60.7696	79.9575	2269.16	117.159
44	21IWH04sm-3	2022-06-21 17:48:15	6.504	4591.37	2.01413e+06	5913.09	1468.84	0.248405	1.18886	0.0588275	0.0703665	0.0019407	0.122714	0.00257813	0.843625	0.23283	14.2743	0.38316	0.0435697	0.00254052	794.827	26.6463	438.3	11.6713	1992.66	36.9251	21.9957	55.144	861.759	49.3396
45	21IWH04sm-13	2022-06-21 18:01:58	21.734	1515.56	1.13634e+06	945.339	203.002	0.21474	3.75373	0.170743	0.225302	0.00417799	0.121104	0.001734	0.761077	0.388123	4.45706	0.0827725	0.135125	0.0063268	1581.68	36.5351	1309.38	21.9638	1969.66	25.4504	66.4772	82.7838	2559.93	112.201
46	21IWH04sm-18	2022-06-21 18:05:30	13.752	1629	3.84356e+06	5165.14	878.197	0.170024	2.08402	0.095452	0.148216	0.00286309	0.102177	0.00166209	0.632754	0.461623	6.76806	0.13186	0.0866789	0.00408774	1142.88	31.6644	890.787	16.0755	1664.84	28.0283	53.5058	77.9422	1679.61	76.0559
47	21IWH04sm-26	2022-06-21 18:15:50	9.153	3247.75	2.22666e+06	965.33	354.546	0.36728	7.16325	0.349248	0.427951	0.0110623	0.121643	0.00247302	0.692816	0.414024	2.34943	0.0614505	0.145883	0.00989042	2129.95	43.6513	2294.92	49.9483	1976.24	36.5058	116.125	107.745	2747.08	175.447
48	21IWH04-z7	2022-06-20 17:43:30	24	1305.87	1.52708e+06	1101.04	289.765	0.263173	4.67357	0.148386	0.312404	0.00623989	0.108924	0.00124235	0.832946	0.270851	3.23043	0.0635197	0.11305	0.00405255	1759.2	26.1929	1750.83	30.5389	1776.91	20.56	98.5324	99.5241	2161.25	73.5319
49	21IWH04-z14	2022-06-20 17:52:42	24	84.5417	1.11897e+06	760.147	142.172	0.187033	4.49646	0.121545	0.314534	0.00369255	0.103761	0.000792292	0.599284	0.470831	3.18404	0.0373163	0.0940482	0.00176966	1729.8	22.5662	1762.7	18.0985	1690.19	14.1173	104.29	101.902	1816.3	32.7109
50	21IWH04-z23	2022-06-20 18:03:45	24	57.0392	856999	609.241	130.137	0.213606	4.40581	0.119599	0.309214	0.00361773	0.102785	0.000735984	0.64675	0.391678	3.23243	0.0379199	0.0923833	0.00165162	1712.86	22.4573	1736.57	17.8266	1672.98	13.3072	103.801	101.384	1785.61	30.5044
51	21IWH04-z6	2022-06-20 17:42:47	24	7769.54	4.47227e+06	1957.88	276.624	0.141287	8.94643	0.332536	0.540629	0.0158561	0.120662	0.00101123	0.958084	0.257378	1.897	0.0605789	0.407761	0.0136979	2323.43	35.3924	2776.75	67.0864	1963.49	14.9639	141.42	119.511	6887	200.126
52	21IWH04-z11	2022-06-20 17:46:22	24	3098.15	949173	1362.29	416.209	0.305521	3.20626	0.115464	0.162341	0.00531196	0.146542	0.00229396	0.840437	0.446956	6.3636	0.229584	0.115791	0.003081	1456.2	29.5704	967.909	29.578	2302.07	25.8606	42.0452	66.468	2212.69	55.7412
53	21IWH04-z15	2022-06-20 17:53:24	24	2434.97	5.38009e+06	7445.58	1173.82	0.157653	2.35941	0.0734705	0.168407	0.00337192	0.102397	0.000871844	0.830197	0.343809	5.994	0.120115	0.0758223	0.00181838	1228.26	22.0178	1002.7	18.588	1665.26	15.6844	60.2127	81.6359	1476.57	34.1386
54	21IWH04-z18	2022-06-20 17:55:33	24	17197.7	4.35487e+06	1830.32	525.938	0.287347	11.2632	0.601063	0.542362	0.0234704	0.149749	0.00174942	0.972809	-0.404403	1.96681	0.103077	0.352837	0.0166516	2513.88	54.4209	2771.43	100.081	2338.7	19.8247	118.503	110.245	6064.47	252.372
55	21IWH04-z28	2022-06-20 18:07:19	24	7181.05	3.52406e+06	2667.89	934.112	0.350131	5.45319	0.160972	0.305598	0.00464351	0.128905	0.00139493	0.729002	0.24021	3.28087	0.0499868	0.147111	0.00309014	1891.2	25.211	1718.26	22.8312	2079.06	19.2098	82.6457	90.8555	2772.59	54.3087
56	21IWH04-z29	2022-06-20 18:12:12	24	602.059	776268	791.208	170.976	0.216094	3.46515	0.181183	0.221939	0.00961514	0.112793	0.000976512	0.986154	-0.203233	4.77645	0.224015	0.101077	0.00408467	1500.05	41.9399	1286.39	50.823	1842.1	15.8646	69.8329	85.7566	1942.42	74.8056
	21IWH06
1	21IWH06-z1	2022-06-20 18:13:42	24	128.042	453901	393.359	134.648	0.342304	3.1875	0.087924	0.252571	0.00353318	0.0917368	0.000854902	0.642839	0.517706	3.97217	0.0561261	0.0771486	0.00146926	1453.42	21.4335	1451.3	18.1891	1458.55	17.7384	99.5028	99.854	1501.78	27.5651
2	21IWH06-z5	2022-06-20 18:16:34	24	56.6089	752632	654.338	149.939	0.229145	3.22175	0.0911265	0.258038	0.00384692	0.0905989	0.000809808	0.738984	0.46421	3.88466	0.0571649	0.0764348	0.00142733	1461.35	21.8792	1479.25	19.7442	1437.07	17.6199	102.935	101.225	1488.41	26.7805
3	21IWH06-z6	2022-06-20 18:17:17	24	-47.4582	453264	395.048	89.8588	0.227463	3.17629	0.0878668	0.253201	0.00322871	0.0912427	0.000833236	0.601023	0.34806	3.95832	0.0510009	0.0794893	0.00161515	1450.66	21.441	1454.67	16.6168	1448.39	17.4519	100.434	100.276	1545.55	30.2599
4	21IWH06-z8	2022-06-20 18:22:48	24	31.1662	446031	392.59	88.0782	0.224351	3.15139	0.088089	0.252242	0.00335848	0.0907692	0.000860103	0.609184	0.370165	3.97511	0.0533274	0.077664	0.00158342	1444.45	21.6435	1449.68	17.2934	1438.25	18.1125	100.795	100.362	1511.36	29.6606
5	21IWH06-z10	2022-06-20 18:24:15	24	71.6718	443972	387.748	82.8135	0.213575	3.20803	0.0899402	0.25537	0.00324421	0.091079	0.000862982	0.749917	-0.202592	3.91896	0.0523014	0.0755146	0.00157788	1458.19	21.2907	1465.82	16.6453	1444.74	18.1096	101.459	100.523	1471	29.6422
6	21IWH06-z12	2022-06-20 18:25:41	24	68.0504	452915	395.272	91.4144	0.231269	3.1994	0.0875427	0.257308	0.00337077	0.0903171	0.000891303	0.605118	0.214817	3.89611	0.0510662	0.0770148	0.00162139	1456.42	21.0674	1475.72	17.2726	1428.44	18.9128	103.31	101.325	1499.15	30.4206
7	21IWH06-z14	2022-06-20 18:27:07	24	18.3959	272591	238.668	48.3582	0.202617	3.13558	0.0897133	0.250848	0.00358655	0.0908053	0.0010054	0.374548	-0.00209098	3.98812	0.0536971	0.0738971	0.00187716	1440.26	22.0393	1442.4	18.4912	1437.81	21.2028	100.319	100.148	1440.3	35.279
8	21IWH06-z15	2022-06-20 18:32:22	24	87.4078	798137	712.846	82.396	0.115587	3.15479	0.0855346	0.25058	0.00315499	0.0910762	0.000768462	0.570295	0.574064	3.99913	0.0502392	0.0796903	0.00168677	1446.6	19.9601	1441.19	16.2503	1447.47	16.8213	99.5662	99.6264	1549.26	31.6126
9	21IWH06-z16	2022-06-20 18:33:05	24	63.7887	342355	306.639	79.1471	0.258112	3.12895	0.0862755	0.249478	0.0033368	0.0907092	0.000861513	0.548377	0.588153	4.01938	0.0543178	0.076821	0.00163235	1440.1	20.6424	1435.44	17.2243	1436.99	18.0629	99.8918	99.6758	1495.5	30.6618
10	21IWH06-z19	2022-06-20 18:35:14	24	155.37	722594	642.856	141.107	0.219501	3.29384	0.0900623	0.254991	0.00334767	0.0930578	0.000832039	0.572137	0.597637	3.92658	0.0530719	0.0842998	0.00172809	1479	21.2555	1463.83	17.176	1490.31	16.8561	98.2234	98.974	1635.36	32.1898
11	21IWH06-z21	2022-06-20 18:36:40	24	50.5277	432192	376.123	111.829	0.297321	3.21574	0.0893631	0.256155	0.00347502	0.0905269	0.000836551	0.601684	0.363053	3.91002	0.0544315	0.0771554	0.00155341	1460.16	21.3603	1469.76	17.8116	1433.3	17.7099	102.543	100.657	1501.84	29.1354
12	21IWH06-z22	2022-06-20 18:37:23	24	76.4023	455885	439.897	105.579	0.240007	3.10001	0.0971224	0.247724	0.00461338	0.0906286	0.000836291	0.812879	0.156453	4.0575	0.081697	0.0743122	0.00185887	1432.35	24.1401	1425.72	24.1197	1435.43	17.7879	99.3236	99.5373	1448.13	35.0072
13	21IWH06-z23	2022-06-20 18:42:12	24	230.077	681677	608.049	133.76	0.219982	3.34208	0.0941722	0.259427	0.0036042	0.0930172	0.000945685	0.597807	0.349112	3.86675	0.0536907	0.0865087	0.00241362	1489.92	21.8312	1486.48	18.4311	1486.71	19.6727	99.9847	99.7689	1675.8	44.5435
14	21IWH06-z24	2022-06-20 18:42:55	24	29.0755	638019	586.394	141.951	0.242074	3.16755	0.0899984	0.250906	0.00372935	0.0909674	0.000775659	0.76369	0.371567	4.00175	0.0607288	0.0756893	0.0014236	1448.16	22.0203	1442.63	19.2407	1443.03	16.2153	99.9719	99.618	1474.41	26.7639
15	21IWH06-z25	2022-06-20 18:43:37	24	39.3231	427117	392.625	113.219	0.288364	3.16019	0.0884106	0.248703	0.00353837	0.0915822	0.000790914	0.693523	0.442565	4.03477	0.0579975	0.0757063	0.00145315	1446.59	21.6106	1431.34	18.2702	1455.79	16.3856	98.3205	98.946	1474.7	27.29
16	21IWH06-z26	2022-06-20 18:44:20	24	121.492	782671	683.312	162.543	0.237875	3.39002	0.0936897	0.26527	0.00338781	0.0922763	0.000881745	0.527723	0.461136	3.7782	0.0481709	0.0833889	0.00182613	1501.34	21.5142	1516.43	17.2483	1469.54	18.138	103.191	101.005	1618.28	34.0047
17	21IWH06-z27	2022-06-20 18:45:03	24	186.042	449709	402.762	84.0887	0.20878	3.38627	0.104629	0.256838	0.00331851	0.0948987	0.00162544	0.166792	0.332701	3.89797	0.0523874	0.0846879	0.00343834	1498.87	23.328	1473.33	17.0247	1520.59	31.2294	96.892	98.2957	1640.41	62.9938
18	21IWH06-z29	2022-06-20 18:46:29	24	0.853275	681835	608.831	145.154	0.238414	3.22817	0.0883161	0.255884	0.00348002	0.0910211	0.000705852	0.730845	0.509579	3.91966	0.054689	0.0770264	0.00150042	1463.35	21.2426	1468.36	17.8978	1444.61	14.7034	101.644	100.342	1499.46	28.1251
19	21IWH06-z30	2022-06-20 18:47:12	24	33.4092	545541	507.748	166.9	0.328706	3.13787	0.0870307	0.25013	0.00347241	0.0906337	0.000752135	0.738094	0.38479	4.00459	0.0540755	0.0759649	0.0013636	1441.25	21.4028	1438.74	17.9114	1438.19	15.28	100.038	99.826	1479.63	25.5802
20	21IWH06-z33	2022-06-20 18:53:32	24	61.6192	448463	395.071	95.315	0.241261	3.25693	0.0886149	0.260568	0.00351414	0.091029	0.000823004	0.708601	0.581529	3.84868	0.0525081	0.0762987	0.00160155	1470.31	21.0696	1492.36	17.9824	1443.98	17.3128	103.35	101.5	1485.72	30.0578
21	21IWH06-z34	2022-06-20 18:54:15	24	25.7843	348610	310.814	74.7074	0.240361	3.20539	0.089366	0.255408	0.00328311	0.0913268	0.000900962	0.597381	0.370264	3.92451	0.0513674	0.0770926	0.00169335	1457.6	21.697	1465.99	16.8798	1449.64	18.8394	101.128	100.576	1500.55	31.7144
22	21IWH06-z36	2022-06-20 18:55:41	24	68.8742	334206	302.801	67.5355	0.223036	3.11609	0.0877942	0.249632	0.00336523	0.0909402	0.000809478	0.688387	0.288651	4.0173	0.0550125	0.0787382	0.00178192	1435.68	21.7853	1436.22	17.3731	1446.62	18.0223	99.2808	100.037	1531.33	33.4081
23	21IWH06-z37	2022-06-20 18:56:24	24	28.9898	513144	460.877	82.6597	0.179353	3.14974	0.0933604	0.251785	0.00440981	0.0911485	0.000791342	0.906731	0.326507	4.00196	0.0819011	0.0752917	0.00159307	1443.08	24.0628	1446.81	22.9897	1446.73	16.5023	100.005	100.258	1466.8	29.9382
24	21IWH06-z40	2022-06-20 19:03:11	24	63.4742	471108	424.735	178.53	0.420333	3.23947	0.0906827	0.258918	0.00371066	0.0912309	0.00087188	0.671837	0.45921	3.86963	0.0530195	0.081039	0.00166196	1465.75	21.6006	1483.83	18.9704	1447.85	18.3075	102.485	101.233	1574.52	31.024
25	21IWH06-z41	2022-06-20 19:03:54	24	39.4304	550701	478.402	107.945	0.225636	3.24301	0.0885352	0.258601	0.00316699	0.0911068	0.000725901	0.639547	0.440789	3.86547	0.047078	0.0751846	0.00143473	1466.94	21.1348	1482.43	16.2219	1446.29	15.0893	102.499	101.056	1464.91	26.9602
26	21IWH06-z42	2022-06-20 19:04:37	24	97.9803	723551	629.178	137.184	0.218037	3.23708	0.0874295	0.259479	0.0033029	0.0907603	0.000849409	0.419327	0.666321	3.86243	0.0493614	0.076722	0.00135318	1465.66	20.9107	1486.87	16.9028	1440.37	17.2954	103.229	101.448	1493.86	25.3858
27	21IWH06-z43	2022-06-20 19:05:20	24	47.1483	308721	269.871	63.0933	0.23379	3.18868	0.0897952	0.25418	0.0035081	0.0910576	0.000987904	0.554256	0.474068	3.94621	0.0542466	0.0767889	0.00177249	1453.43	21.7134	1459.59	18.0072	1443.31	20.605	101.128	100.424	1494.77	33.2497
28	21IWH06-z44	2022-06-20 19:06:03	24	260.14	669808	589.94	116.858	0.198085	3.39154	0.0934782	0.25927	0.00331996	0.0951594	0.000862505	0.570615	0.486336	3.8606	0.0481894	0.0908629	0.00188675	1502.68	22.3179	1485.79	17.0184	1528.07	17.0111	97.2336	98.8763	1757.24	34.9746
29	21IWH06-z2	2022-06-20 18:14:25	24	11907	1.19755e+06	5507.57	2152.76	0.390872	1.55544	0.0842195	0.0510083	0.0031192	0.228336	0.00391549	0.884366	0.622464	21.4981	1.18594	0.0973316	0.0140474	940.32	32.7789	319.885	19.0053	3031.54	29.1805	10.5519	34.0188	1870.74	258.015
30	21IWH06-z3	2022-06-20 18:15:08	24	129.018	877944	801.021	186.507	0.232836	3.05061	0.083782	0.239869	0.00328208	0.092571	0.000860559	0.645449	0.591517	4.1816	0.0586117	0.0780976	0.00148533	1419.75	21.0999	1385.66	17.0885	1475.75	17.7367	93.8955	97.5989	1519.58	27.8221
31	21IWH06-z4	2022-06-20 18:15:51	24	1948.23	877015	777.025	186.063	0.239456	4.22388	0.24023	0.251785	0.00660628	0.120604	0.0045023	0.697971	-0.338022	4.0404	0.121684	0.191218	0.0189203	1653.15	46.8709	1445.29	34.4785	1921.33	64.9213	75.2234	87.4261	3462.71	316.539
32	21IWH06-z7	2022-06-20 18:22:05	24	639.064	723162	1251.44	396.056	0.316479	2.1078	0.10671	0.155062	0.00787985	0.0998393	0.00132166	0.956352	0.478037	6.96486	0.36168	0.0460458	0.00240284	1137.86	35.5044	924.956	43.801	1614.91	24.0799	57.2761	81.2891	908.397	46.0859
33	21IWH06-z9	2022-06-20 18:23:32	24	-9.56343	468886	411.703	88.1807	0.214185	3.144	0.0859606	0.254747	0.00312487	0.0895273	0.000908075	0.353723	0.539293	3.9328	0.048334	0.0750209	0.00143648	1442.95	20.9625	1462.66	16.0505	1411.52	19.1542	103.623	101.366	1461.83	27.0016
34	21IWH06-z11	2022-06-20 18:24:58	24	203.604	632680	612.873	237.409	0.387371	3.01469	0.0968191	0.232958	0.00643135	0.094274	0.00117839	0.909851	0.722606	4.32967	0.123693	0.0774934	0.00149295	1415.19	22.0076	1352.03	32.876	1507.85	23.4088	89.666	95.5373	1508.23	27.9743
35	21IWH06-z13	2022-06-20 18:26:23	24	79.2812	753870	636.229	225.734	0.3548	3.28008	0.0910027	0.262343	0.00342605	0.0907	0.000688623	0.734961	0.259855	3.81638	0.0523979	0.0777135	0.00138086	1476.6	22.344	1501.47	17.5134	1437.95	14.5305	104.417	101.684	1512.45	25.9203
36	21IWH06-z17	2022-06-20 18:33:48	24	116.561	451525	403.743	134.989	0.334345	3.29854	0.09153	0.252534	0.00311661	0.094416	0.00105807	0.263455	0.512014	3.96747	0.0489766	0.0766808	0.00155815	1479.91	21.6661	1451.28	16.0365	1511.71	21.213	96.0024	98.0654	1492.93	29.2285
37	21IWH06-z18	2022-06-20 18:34:31	24	216.351	423290	366.904	94.0847	0.256429	3.5519	0.117078	0.259185	0.00355177	0.0990455	0.00205296	0.203321	0.264634	3.87002	0.0542205	0.10539	0.00584604	1535.15	25.8585	1485.26	18.2106	1591.36	37.9524	93.3329	96.7504	2017.24	106.057
38	21IWH06-z20	2022-06-20 18:35:57	24	128.638	498034	459.183	91.9896	0.200333	3.21556	0.0900705	0.246682	0.00354645	0.0943379	0.00116424	0.410024	0.587661	4.0622	0.0573502	0.0896245	0.00380439	1460.01	21.518	1420.89	18.3529	1509.32	22.9279	94.1415	97.3209	1731.52	70.0024
39	21IWH06-z28	2022-06-20 18:45:46	24	736.852	1.57396e+06	3195.21	1036.21	0.324302	1.63765	0.0967375	0.125816	0.00713918	0.0944281	0.000837897	0.991753	0.491565	8.61242	0.454245	0.0464887	0.00326644	969.237	35.6999	760.23	40.4035	1513.63	16.7054	50.2255	78.4359	915.548	63.7238
40	21IWH06-z31	2022-06-20 18:52:06	24	114.992	726659	704.38	133.34	0.189301	2.9589	0.086792	0.236232	0.00391476	0.0909013	0.00078563	0.820659	0.326511	4.25635	0.069154	0.0781913	0.00144914	1395.62	22.1076	1366.43	20.3567	1443.55	17.0431	94.6572	97.908	1521.36	27.1642
41	21IWH06-z32	2022-06-20 18:52:49	24	684.728	368839	2641.09	610.701	0.23123	0.541829	0.0293032	0.0338665	0.00198381	0.116367	0.00162264	0.994903	0.663505	31.1431	0.876591	0.0210306	0.000721627	431.709	12.7711	214.367	12.0532	1898.36	24.7418	11.2922	49.6555	420.534	14.2332
42	21IWH06-z35	2022-06-20 18:54:58	24	269.188	398393	356.579	82.8307	0.232293	3.49436	0.118426	0.253175	0.00321652	0.100514	0.00227706	0.0791647	0.295949	3.95855	0.0505721	0.117856	0.00991539	1521.76	26.1688	1454.54	16.5457	1616.06	41.2438	90.0051	95.5829	2228.9	177.14
43	21IWH06-z38	2022-06-20 18:57:07	24	1119.73	645673	1196.75	387.513	0.323805	1.99308	0.0566236	0.126185	0.00280365	0.116867	0.002717	0.336683	0.81392	8.03351	0.200301	0.0677784	0.00235562	1112.32	19.0647	765.57	16.1264	1892.09	39.4957	40.4616	68.8262	1324.23	44.3194
44	21IWH06-z39	2022-06-20 19:02:28	24	188.271	355430	333.007	70.8318	0.212703	3.1629	0.092247	0.239014	0.00358892	0.0965494	0.00102223	0.722737	0.369522	4.20218	0.0672046	0.0947488	0.00208602	1448.14	22.2018	1381.07	18.7627	1556.78	20.6713	88.7134	95.3684	1828.94	38.4859
45	21IWH06-z45	2022-06-20 19:06:46	24	1004.13	833889	1703.23	411.687	0.24171	2.49217	0.186602	0.169535	0.0112745	0.105267	0.00178945	0.952367	-0.0944786	7.1929	0.69568	0.0825959	0.00643965	1225.83	60.3061	1000.55	63.1614	1718.6	32.1625	58.2189	81.6222	1593.61	120.202
46	21IWH06-z46	2022-06-20 19:07:29	24	197.59	464557	439.911	121.249	0.275622	3.14681	0.0965713	0.240447	0.00505113	0.0952376	0.00119946	0.503124	0.285661	4.19412	0.0903589	0.0835912	0.00203914	1441.97	23.3	1387.73	26.3417	1527.05	23.1924	90.8765	96.2385	1621.84	37.9819
	21AG06
1	21AG07-z6	2022-06-20 16:42:02	23.342	66.0514	320451	281.338	184.547	0.655963	3.04739	0.0853296	0.244894	0.00320723	0.0895296	0.000805832	0.666382	0.325152	4.08326	0.05337	0.0724348	0.00124433	1418.7	21.4658	1413.44	17.201	1412.34	17.3548	100.077	99.6288	1413.27	23.455
2	21AG07-z8	2022-06-20 16:43:27	24.207	74.0869	229568	205.058	100.626	0.490721	3.02395	0.0861297	0.240045	0.00323268	0.0907065	0.000927554	0.597984	0.290341	4.17768	0.0565553	0.06998	0.00139599	1412.56	21.6719	1386.59	16.8055	1436.33	19.7524	96.5373	98.1619	1366.82	26.3576
3	21AG07-z12	2022-06-20 16:46:20	14.774	31.4727	770049	692.621	340.754	0.491977	3.07502	0.0845678	0.244194	0.00307915	0.0906814	0.000794352	0.58887	0.426163	4.10054	0.0524562	0.0649267	0.00150303	1426.08	21.1205	1408.3	15.9724	1437.71	16.7834	97.9544	98.7529	1271.2	28.5134
4	21AG07-z28	2022-06-20 17:06:24	10.666	777.428	1.03343e+06	676.491	361.867	0.534917	5.47457	0.156182	0.336601	0.00514253	0.118119	0.00134866	0.597121	0.525438	2.9765	0.0456572	0.121149	0.00342399	1896	24.14	1869.91	24.8037	1925.54	20.51	97.1111	98.6241	2310.36	61.7422
5	21AG07-z34	2022-06-20 17:14:53	10.065	198.641	548541	464.682	148.049	0.318602	3.12368	0.0918503	0.250638	0.00386926	0.0904137	0.000865203	0.819994	0.255015	3.99728	0.0614864	0.0703339	0.00146124	1437.88	22.5293	1441.52	19.932	1432.29	18.2462	100.644	100.254	1373.68	27.6175
6	21AG07-z43	2022-06-20 17:25:26	24.189	57.5768	522353	438.621	292.91	0.667798	3.05037	0.0827916	0.245684	0.00307147	0.090089	0.000726614	0.613409	0.518847	4.0786	0.050733	0.0696697	0.00121345	1419.84	20.7773	1415.92	15.8813	1424.78	15.3674	99.3781	99.7241	1361.09	22.9572
7	21AG07-z44	2022-06-20 17:26:08	23.55	49.1574	144925	120.365	51.6484	0.429097	3.02396	0.087335	0.245889	0.00335612	0.0892268	0.000955475	0.628639	0.21193	4.07302	0.0542687	0.071125	0.00169903	1412.38	22.1559	1416.88	17.3741	1404.67	20.4714	100.869	100.319	1388.21	32.0538
8	21AG07-z47	2022-06-20 17:32:55	20.773	54.3077	531172	446.362	133.495	0.299073	3.1078	0.0863388	0.250744	0.00314588	0.0899048	0.000754104	0.632846	0.288808	3.99526	0.0498321	0.0719931	0.00127502	1433.94	21.3037	1442.08	16.2003	1420.96	15.9435	101.486	100.568	1404.95	24.0431
9	21AG07-z48	2022-06-20 17:33:51	11.607	44.3078	722723	576.538	299.795	0.519992	3.13077	0.0915118	0.251562	0.00361542	0.0902303	0.000859493	0.761315	0.110267	3.98194	0.0569171	0.0705107	0.00131006	1439.55	22.4426	1446.3	18.6018	1428.25	18.2212	101.264	100.469	1377.05	24.7492
10	21AG07-z7	2022-06-20 16:42:54	14.431	5231.9	2.59196e+06	3916.71	1072.69	0.273875	2.37821	0.0783331	0.148623	0.00406086	0.11551	0.0013304	0.922967	0.664498	6.80551	0.180835	0.093385	0.00211689	1234.27	23.5816	892.609	22.7361	1884.78	20.6914	47.3588	72.319	1804.03	39.1971
11	21AG07-z9	2022-06-20 16:44:11	24	5107.99	872743	8139.35	2122.78	0.260805	0.580018	0.0195376	0.0246679	0.000605848	0.16908	0.00122498	0.950356	0.34837	41.1635	1.00019	0.0385917	0.00136968	463.546	12.5084	157.061	3.81014	2546.72	12.2869	6.16718	33.8825	764.884	26.5891
12	21AG07-z10	2022-06-20 16:44:54	16.814	1879.83	974691	1390.99	994.943	0.715275	2.60188	0.141116	0.165153	0.0070633	0.113236	0.0028669	0.850512	-0.171998	6.32892	0.331626	0.078667	0.0106172	1287.11	43.6622	982.983	39.4489	1837.32	44.7417	53.501	76.3716	1510.56	198.056
13	21AG07-z11	2022-06-20 16:45:37	24	21.0896	1.56347	0.00545679	0.00377409	0.691631	-10.4706	107.429	1.13202	1.17071	0.165022	0.284664	0.171113	0.104832	0.0343564	0.195635	0.218137	2.09543	5602.82	273.186	9120.46	1406.86	3153.57	408.345	289.211	162.783	24154.1	6960.59
14	21AG07-z13	2022-06-20 16:47:01	3.971	-43.9275	360030	454.508	80.0259	0.176071	2.37541	0.117858	0.187782	0.00670075	0.090833	0.00225255	0.805771	0.0131906	5.35429	0.184653	0.0470936	0.014262	1233.15	34.8268	1108.9	36.2259	1438.99	45.5345	77.0606	89.9238	921.092	278.755
15	21AG07-z14	2022-06-20 16:52:09	6.24	2668.84	424031	3940.33	1704.18	0.432496	0.5387	0.0158381	0.0230492	0.000349064	0.168039	0.00260033	0.292865	0.520515	43.431	0.651783	0.0295805	0.00114851	437.481	10.456	146.896	2.19921	2535.81	26.0255	5.79288	33.5777	589.131	22.5553
16	21AG07-z15	2022-06-20 16:52:35	11.838	6902.22	5.64666e+06	14693.6	7473.46	0.50862	1.26076	0.0350099	0.0890674	0.00146074	0.102181	0.00131396	0.464791	0.721886	11.2571	0.183199	0.0357684	0.00225693	828.04	15.7151	549.962	8.64063	1660.71	24.1311	33.116	66.4173	709.65	43.9747
17	21AG07-z16	2022-06-20 16:53:17	10.712	2542.12	4.35771e+06	5900.1	1488.2	0.252233	2.33832	0.0649283	0.173527	0.00241129	0.0971752	0.000907786	0.633	0.488568	5.77088	0.08099	0.0803014	0.00154073	1223.71	19.7833	1031.42	13.252	1568.65	17.5676	65.7519	84.2859	1561.03	28.8453
18	21AG07-z17	2022-06-20 16:54:01	15.796	5098.55	1.64905e+06	7349.05	1224.24	0.166585	0.954521	0.0415222	0.0534676	0.00246322	0.129966	0.00170289	0.981427	0.836945	19.4357	0.855516	0.0655356	0.0011978	677.607	21.299	335.443	15.0356	2093.49	22.9994	16.0232	49.5041	1282.88	22.7288
19	21AG07-z18	2022-06-20 16:54:43	9.62	4923.38	723145	3216.16	1096.91	0.341063	1.32199	0.0358606	0.0527588	0.000720513	0.180915	0.00215062	0.185809	0.757838	18.9761	0.259627	0.0779207	0.00142743	855.276	15.6479	331.427	4.41194	2659.13	19.6375	12.4638	38.7509	1516.48	26.7931
20	21AG07-z19	2022-06-20 16:55:26	24	4002.88	3.07762e+06	6047.44	1831.26	0.302816	1.559	0.0621688	0.102192	0.00526132	0.114223	0.00303628	0.977664	0.966498	10.6626	0.608399	0.0566915	0.00135506	948.929	24.6864	625.11	30.7816	1845.49	45.7205	33.8723	65.8753	1114.19	25.8355
21	21AG07-z20	2022-06-20 16:56:09	7.45	7459.63	6.54566e+06	16118.4	2681.72	0.166376	1.31352	0.03849	0.095524	0.00211776	0.0995289	0.00200099	0.367898	0.773435	10.5078	0.240437	0.0642363	0.00219574	851.407	17.0123	588.035	12.4747	1610.35	38.0057	36.5161	69.0663	1258.02	41.6761
22	21AG07-z21	2022-06-20 16:56:59	12.598	-49.2076	533157	550.594	139.843	0.253985	2.53706	0.0726121	0.202233	0.00303485	0.0907038	0.000929016	0.689974	0.407389	4.95522	0.0738885	0.0518269	0.00123203	1282.17	20.8702	1187.11	16.2582	1437.89	19.4605	82.5592	92.5862	1021.13	23.6661
23	21AG07-z22	2022-06-20 17:02:08	24	3593.48	574035	6261.46	1640.55	0.262008	0.4814	0.0182197	0.0207809	0.000725925	0.16876	0.00189826	0.949796	0.656052	49.7686	1.73368	0.0337001	0.00135887	397.835	12.4059	132.544	4.58116	2543.76	19.8036	5.21056	33.3163	669.453	26.5379
24	21AG07-z23	2022-06-20 17:02:56	13.69	3561.67	450045	4457.32	1856.49	0.416505	0.591813	0.0174494	0.022382	0.000298729	0.191894	0.00222887	0.672522	0.0737405	44.7453	0.582186	0.0295746	0.000830629	471.802	11.0281	142.69	1.88296	2755.83	19.0086	5.17777	30.2436	589.009	16.3023
25	21AG07-z24	2022-06-20 17:03:33	6.325	283.343	664389	960.222	950.362	0.989732	2.00278	0.0665031	0.153529	0.0034903	0.0946243	0.00167388	0.645804	0.448126	6.53459	0.145199	0.0272061	0.00373595	1115.73	22.1941	920.527	19.4693	1516.98	33.9431	60.6814	82.5046	541.511	74.0381
26	21AG07-z25	2022-06-20 17:04:17	10.098	5415.31	775874	10194.7	2756.75	0.27041	0.440523	0.0126041	0.0178296	0.000281299	0.178856	0.00179157	0.626501	0.49697	56.1982	0.877367	0.0274924	0.000703399	370.54	8.88065	113.922	1.7814	2640.54	16.6527	4.31436	30.7449	548.135	13.836
27	21AG07-z26	2022-06-20 17:04:59	24	9.96181	26.7455	0.000200281	0.00342159	17.0839	-149.063	120.85	-0.91899	1.53051	-0.18003	0.603572	-0.0545113	-0.2112	0.48534	0.204075	-0.385933	2.21763	5832.79	276.645	8040.44	1489.79	3867.9	326.879	207.876	137.849	36484.8	4693.01
28	21AG07-z27	2022-06-20 17:05:53	12.48	10009.3	1.66794e+06	3222.8	262.307	0.0813909	2.60303	0.0749537	0.111294	0.00151137	0.169625	0.00181974	0.628406	0.224596	8.99868	0.123035	0.543706	0.0176897	1300.89	21.0982	680.211	8.76883	2551.7	18.0219	26.6572	52.2883	8758.08	232.014
29	21AG07-z29	2022-06-20 17:07:25	5.827	2888.86	525261	3192.31	751.272	0.235338	0.782789	0.0292005	0.0348324	0.000686485	0.162797	0.00380667	0.501927	0.160617	28.7705	0.579102	0.0573413	0.00190776	586.586	16.6344	220.714	4.27772	2480.52	39.315	8.89793	37.627	1126.79	36.4678
30	21AG07-z30	2022-06-20 17:11:55	18.629	1776.68	2.16778e+06	9490.8	4284.37	0.451423	0.751251	0.0387728	0.0566312	0.00264656	0.0964739	0.000666709	0.993147	0.253174	18.6011	0.917885	0.0172112	0.00134342	564.593	22.6737	354.654	16.1527	1555.32	12.877	22.8026	62.8159	344.515	26.7449
31	21AG07-z31	2022-06-20 17:12:58	5.05	1983.99	987021	5341.63	2200.33	0.411921	0.596583	0.020872	0.0389597	0.000762277	0.110096	0.00187361	0.72063	0.224803	25.562	0.607039	0.0199118	0.000805176	474.83	13.3289	246.373	4.73054	1798.37	30.5977	13.6998	51.8866	398.472	15.9445
32	21AG07-z32	2022-06-20 17:13:22	12.757	4907.2	605140	5937.66	2556.73	0.430596	0.645028	0.018457	0.0233914	0.000335137	0.200305	0.00190116	0.699144	0.319002	42.8282	0.60349	0.0304046	0.000749617	505.247	11.3289	149.051	2.11056	2829.58	14.3931	5.2676	29.5006	605.324	14.705
33	21AG07-z33	2022-06-20 17:14:11	17.437	4251.21	520849	5270.8	2284.39	0.433404	0.592034	0.0215021	0.0214296	0.000538	0.200342	0.0020039	0.931454	-0.0186592	47.1801	1.10382	0.0293324	0.000770717	471.207	13.5355	136.668	3.39224	2826.56	16.1793	4.83513	29.0037	584.248	15.1193
34	21AG07-z35	2022-06-20 17:15:30	4.986	-29.595	299732	331.087	235.856	0.712368	2.51244	0.0758129	0.205208	0.00366419	0.0888558	0.0015003	0.345633	0.288731	4.88005	0.086255	0.0466745	0.0113842	1275.26	22.0021	1203.1	19.5755	1398.12	32.8778	86.0517	94.3418	914.447	222.941
35	21AG07-z36	2022-06-20 17:16:13	21.931	338.799	323046	3721.95	858.994	0.230792	0.286552	0.015386	0.022118	0.000843895	0.0929623	0.00132488	0.952597	-0.453338	46.8561	1.70451	0.0122118	0.000641965	254.361	11.9619	140.972	5.31738	1480.34	26.5798	9.52291	55.422	245.227	12.7989
36	21AG07-z37	2022-06-20 17:16:57	21.683	444.148	352556	6015.05	1016.65	0.169018	0.169732	0.0056724	0.0134053	0.000306712	0.0921295	0.000892816	0.892523	0.134157	75.367	1.50745	0.00952604	0.000379879	159.062	4.85544	85.8356	1.94895	1466.72	18.3054	5.85223	53.9635	191.596	7.60462
37	21AG07-z38	2022-06-20 17:21:51	24	6092.31	1.20519e+06	8382.01	1315.55	0.15695	0.693643	0.0251822	0.0324603	0.00122253	0.157074	0.00225838	0.981831	0.938047	32.1746	1.31207	0.0681823	0.00277897	533.344	15.1998	205.801	7.63682	2418.04	24.1275	8.51107	38.5869	1331.29	52.7767
38	21AG07-z39	2022-06-20 17:22:34	24.147	46.9311	398025	375.041	304.418	0.811692	2.72578	0.0749493	0.219506	0.00273229	0.0901691	0.000702338	0.70358	0.286158	4.56486	0.056825	0.0612946	0.00105257	1334.89	20.3656	1279.06	14.4379	1426.63	14.8851	89.6556	95.8171	1202.26	20.0612
39	21AG07-z40	2022-06-20 17:23:18	24	4394.32	1.13802e+06	6072.15	1461.99	0.240769	0.914024	0.0843949	0.0476664	0.00439037	0.141051	0.00183576	0.988992	0.488632	27.8755	2.62061	0.0973095	0.0170905	631.892	44.7904	298.503	26.9619	2234.65	22.5327	13.3579	47.2396	1807.27	303.329
40	21AG07-z41	2022-06-20 17:24:00	16.014	9052.35	5.26929e+06	12176.4	5908.19	0.485216	1.50293	0.0475483	0.0985211	0.00260295	0.111166	0.00133881	0.907319	0.768096	10.2849	0.29414	0.0404422	0.00097361	930.385	19.5249	605.419	15.3134	1818.48	20.7584	33.2926	65.0719	801.198	18.9195
41	21AG07-z42	2022-06-20 17:24:42	13.764	5840.61	1.39131e+06	9489.83	2298.5	0.242207	0.678471	0.0240301	0.0343719	0.000935275	0.14341	0.00142446	0.936751	0.367079	29.4505	0.870305	0.0392998	0.00115674	525.021	14.6444	217.813	5.83448	2266.56	17.0784	9.60983	41.4865	778.946	22.5019
42	21AG07-z45	2022-06-20 17:26:52	17.528	657.487	687843	6203.99	7563.94	1.21921	0.383509	0.030387	0.027377	0.00217611	0.101912	0.000961076	0.995696	0.432615	39.1334	2.38852	0.00302526	0.000284022	329.211	22.1483	173.805	13.5301	1656.57	17.5539	10.4918	52.7942	61.0376	5.71697
43	21AG07-z46	2022-06-20 17:32:12	13.926	4721.12	2.46139e+06	7520.15	5471.89	0.72763	1.20717	0.0738524	0.0781467	0.0044565	0.11248	0.00123346	0.984305	0.382907	13.5221	0.772416	0.0245595	0.000728374	796.09	33.2696	484.129	26.6004	1837.08	19.7258	26.3531	60.8134	490.331	14.3708
44	21AG07-z49	2022-06-20 17:34:22	23.914	1007.1	457982	1250.01	151.756	0.121404	1.40682	0.0905898	0.0890017	0.00578441	0.117454	0.00184055	0.967722	0.643215	12.7372	0.916792	0.120212	0.00458201	879.554	37.3406	551.66	35.1082	1909.79	27.4486	28.8859	62.7204	2289.93	81.9971
45	21AG07-z1	2022-06-20 16:36:14	24	3700.47	629198	3723.82	1365.57	0.366713	0.902083	0.02862	0.0399612	0.000915729	0.163498	0.00137802	0.916003	0.382489	25.3403	0.55656	0.0476487	0.00232153	651.732	15.1992	252.53	5.66931	2491.6	14.6476	10.1353	38.7476	939.44	44.9864
46	21AG07-z2	2022-06-20 16:37:14	5.94	77.3486	508700	473.735	437.447	0.9234	2.83574	0.0899832	0.220675	0.00406288	0.0925782	0.00123236	0.738071	0.217582	4.54004	0.0862116	0.0492049	0.0014301	1364.38	24.0316	1285.25	21.5077	1477.03	25.3081	87.016	94.2004	970.735	27.5369
47	21AG07-z3	2022-06-20 16:37:39	10.118	274.414	644274	742.167	312.016	0.420412	2.56572	0.0729388	0.199241	0.00290648	0.0930309	0.00117412	0.519332	0.479228	5.01473	0.078265	0.0521049	0.00501579	1292.4	22.5988	1171.1	15.6037	1485.53	24.0055	78.834	90.6143	1023.73	98.3934
48	21AG07-z4	2022-06-20 16:38:23	13.388	1038.42	597352	2778.92	5800.43	2.08729	0.826142	0.037796	0.0528451	0.00201232	0.112865	0.00120409	0.967225	-0.0418621	19.4191	0.856864	0.00615338	0.000330584	608.948	21.6712	331.782	12.3482	1843.46	19.3562	17.9978	54.4845	123.975	6.64394
49	21AG07-z5	2022-06-20 16:41:19	23.389	3175.58	588416	5574.76	3127.85	0.561074	0.549981	0.0159731	0.0245661	0.000479663	0.161463	0.00142767	0.882206	0.674298	41.0459	0.777373	0.0179528	0.000867071	444.681	10.4231	156.433	3.01628	2468.49	14.8979	6.33721	35.1788	359.446	17.187
	Notes
	1 Concentration calibration standard: 91500 zircon (U=80 ppm, Th=30 ppm) (Wiedenbeck et al. 2004)
	2 Isotopic ratios corrected for downhole U/Pb fractionation, gas background and instrumental mass bias using Iolite v.4.5 and 91500 zircon as calibration standard
	3 Dates calculated using decay constants of Jaffey et al. (1971) and Iolite v. 4.5
	4 Correlation of 207Pb/235U and 206Pb/238U ratio uncertainties
	5 Correlation of 207Pb/206Pb and 206Pb/238U ratio uncertainties
	6 Uncertainties quoted are 2s 'internal' errors generated by Iolite plus additional systematic error (in quadrature) to ensure that the secondary reference materials yielded a single population within uncertainty of the 'true' value, expressed as 2s "propagated' error (Paton et al. 2010)
	7 % Concordance calculated as (206Pb-238U date/207Pb-235U date)*100
	8 % Concordance calculated as (206Pb-238U date/207Pb-206Pb date)*100
	Strikethrough analyses not included in date calculations

## Sheet: Zircon U-Pb reference materials
	LA-ICP-MS U-Th-Pb Zircon Data for Reference Materials run with zircon grains from Needles Mountains, CO, USA
	Laboratory / Instrumentation: Mineral Isotope Laser Laboratory (MILL), Texas Tech University / June 2022 / Nu Instruments AttoM single collector-magnetic sector-ICPMS / ESI NWR 193mn ArF excimer laser
	Data Acquisition Settings: 202Hg, 204Hg+Pb, 206, 207, 208Pb, 232Th, 235U, 238U on single SEM / 15 um ablation spots
						Concentrations1			Isotopic Ratios2												Dates (Ma)3
	Grain Number	Date/Time	Duration (s)	204Pb cps	206Pb cps	U ppm	Th ppm	U/Th	207Pb/235U	2s abs	206Pb/238U	2s abs	207Pb/206Pb	2s abs	Rho4	Rho5	238U/206Pb	2s abs	208Pb/232Th	2s abs	207Pb/235U	2sprop6	206Pb/238U	2sprop6	207Pb/206Pb	2sprop6	% Conc7	% Conc8	208Pb/232Th	2sprop6
	Plesovice
1	PL-5	2022-06-20 18:19:30	7.664	86.8587	244385	1049.38	103.051	0.0982014	0.397478	0.0125594	0.0542798	0.000886635	0.0532129	0.000888041	0.488244	0.285156	18.4543	0.301998	0.0158529	0.000723587	339.693	9.12974	340.729	5.42063	332.847	38.305	102.368	100.305	317.864	14.3946
2	PL-6	2022-06-20 18:49:28	7.71	63.7788	234438	1056.4	100.998	0.0956057	0.395958	0.0128526	0.0539493	0.000951443	0.0532141	0.0010641	0.386997	0.380095	18.5741	0.318516	0.0166174	0.000773294	338.566	9.39758	338.705	5.8145	331.111	45.444	102.293	100.041	333.062	15.3693
3	PL-7	2022-06-20 19:09:46	5.001	44.629	239747	1104.57	102.763	0.0930348	0.402606	0.0133103	0.0541531	0.00117269	0.0538611	0.00140973	0.162789	0.642625	18.5095	0.411113	0.014075	0.00271208	343.433	9.65568	339.95	7.17517	357.762	60.1108	95.0211	98.9857	282.068	54.2826
4	PL-1	2022-06-20 20:14:43	6.24	-22.8822	211540	1012.24	89.638	0.0885541	0.397883	0.0125946	0.0544414	0.00102428	0.0530821	0.00131521	0.275281	0.414446	18.4082	0.34402	0.0168969	0.000989732	339.955	9.16273	341.713	6.26031	324.372	55.6941	105.346	100.517	338.609	19.6686
5	PL-2	2022-06-20 20:33:07	4.817	-3.03283	222741	1049.81	102.116	0.0972713	0.393771	0.0127329	0.0546799	0.00112355	0.0521985	0.00129619	0.365138	0.429582	18.3244	0.369647	0.0165833	0.00134984	336.996	9.25595	343.173	6.86333	287.891	55.9905	119.202	101.833	332.344	26.8375
6	PL-3	2022-06-20 21:03:13	4.404	143.245	223289	1107.5	104.502	0.0943581	0.386568	0.0138139	0.053978	0.00105822	0.0520309	0.00176885	-0.000256152	0.554811	18.5568	0.369058	0.0167563	0.00130309	331.7	10.1314	338.884	6.47385	276.369	77.6571	122.62	102.166	335.797	25.8985
7	PL-6	2022-06-20 22:13:44	6.01	23.6149	219516	1093.19	105.454	0.0964648	0.394728	0.0124289	0.0540503	0.000960813	0.0530451	0.00122432	0.348886	0.395328	18.5337	0.32749	0.0164331	0.000967066	337.677	8.99772	339.326	5.87425	324.095	52.3139	104.699	100.488	329.395	19.2307
8	PL-1	2022-06-21 17:40:43	4.956	-11.5121	275133	1012.21	85.9543	0.0849172	0.391123	0.0191314	0.0541305	0.00136809	0.0524502	0.00143687	0.307477	0.572502	18.5229	0.461341	0.0168383	0.0010386	335.077	13.9617	339.808	8.36227	297.991	63.5647	114.033	101.412	337.471	20.6467
9	PL-2	2022-06-21 17:52:41	1.698	-75.0275	282310	1086.9	94.9092	0.0873212	0.391397	0.0239294	0.0540074	0.00131242	0.0524993	0.00203583	0.494905	-0.0242755	18.5306	0.443348	0.0155872	0.0014759	335.245	17.3854	339.071	8.02353	301.92	86.4454	112.305	101.141	312.587	29.3511
10	PL-3	2022-06-21 18:29:15	7.984	44.2987	266210	1019.36	87.2259	0.0855691	0.393759	0.018176	0.0537523	0.00101159	0.0532267	0.00116708	0.262365	0.46409	18.6336	0.350806	0.0165626	0.000969336	337.032	13.234	337.504	6.18808	332.102	49.4996	101.627	100.14	331.98	19.267
11	PL-4	2022-06-21 18:59:15	7.57	-90.6774	273672	1069.48	98.2302	0.0918481	0.395325	0.0186007	0.053883	0.0011535	0.0531341	0.00116174	0.372762	0.525377	18.6064	0.402056	0.0154724	0.00110441	338.14	13.5465	338.295	7.05635	328.298	49.6223	103.045	100.046	310.261	21.9903
12	PL-5	2022-06-21 19:29:10	8.442	73.3331	273459	1052	97.325	0.092514	0.398405	0.0189074	0.0538866	0.0010789	0.0535484	0.0011408	0.402181	0.391022	18.5969	0.366975	0.0162091	0.00100483	340.353	13.7688	338.321	6.59603	356.186	43.2638	94.9842	99.4029	324.94	20.0039
13	PL-6	2022-06-21 19:49:19	7.571	-19.7507	273250	1054.24	99.9781	0.0948345	0.393863	0.0191542	0.0536292	0.00113024	0.0535048	0.00128951	0.380729	0.382023	18.69	0.391175	0.0157884	0.00109006	337.023	13.9906	336.745	6.9133	342.677	54.686	98.2688	99.9176	316.557	21.6783
14	PL-7	2022-06-21 19:59:01	6.883	72.9526	261573	975.375	88.8806	0.0911246	0.401108	0.0197159	0.0536001	0.00102214	0.05416	0.00137783	0.319821	0.40815	18.683	0.351784	0.0165578	0.00119779	342.284	14.2583	336.575	6.25118	369.879	58.3832	90.9959	98.3319	331.852	23.8085
15	PL-8	2022-06-21 20:16:32	5.735	-34.0616	258193	935.62	86.8383	0.0928137	0.396956	0.0194437	0.0537659	0.00115517	0.0534052	0.00148061	0.169717	0.51413	18.6357	0.414413	0.016704	0.00116061	339.302	14.1745	337.585	7.07194	337.989	62.7739	99.8805	99.494	334.777	23.0672
	94-35
1	94-35-z1	2022-06-20 16:32:03	12.836	-6.08861	3056.05	78.27	37.9318	0.484627	0.0549734	0.00961657	0.00883235	0.000359963	0.0457359	0.00803975	0.10616	0.124659	115.389	4.85507	0.00225874	0.000493716	53.6806	9.23761	56.6808	2.30044	-281.575	436.277	-20.1299	105.589	45.5635	9.95414
2	94-35-z2	2022-06-20 17:08:16	19.9	78.8337	2890.26	69.9213	39.343	0.562675	0.06327	0.00915482	0.00871591	0.000308465	0.0546194	0.00838549	-0.0687288	0.325328	116.838	4.14853	0.00271081	0.00043315	61.3907	8.75041	55.936	1.97105	189.086	344.524	29.5824	91.1148	54.671	8.72967
3	94-35-z3	2022-06-20 17:38:25	23.731	63.5892	3765.23	93.7661	63.941	0.68192	0.0573408	0.00655339	0.00860155	0.000277308	0.0481078	0.00528402	-0.0604023	0.411959	118.895	3.68531	0.00273547	0.000293666	56.069	6.25828	55.2054	1.772	86.663	240.771	63.7012	98.4598	55.1889	5.91739
4	94-35-z4	2022-06-20 18:08:30	23.777	12.7532	3632.56	90.458	65.0245	0.718837	0.0565526	0.00559146	0.00864538	0.000238909	0.0478561	0.00465266	0.0904094	0.195728	117.836	3.54666	0.00263819	0.000279809	55.4634	5.38077	55.4874	1.52704	41.2332	211.311	134.57	100.043	53.2303	5.63868
5	94-35-z5	2022-06-20 18:39:15	23.269	84.7696	3550.2	94.1002	65.8091	0.699351	0.0603466	0.00636243	0.0085746	0.000243841	0.0518699	0.00562031	-0.0754539	0.441692	117.877	3.1734	0.00252871	0.000252819	59.8529	6.29184	55.0349	1.55872	-76.5578	280.147	-71.8868	91.9504	51.0281	5.0958
6	94-35-z1	2022-06-20 20:16:34	14.407	-14.1206	3329.7	94.2217	44.2166	0.469282	0.0541025	0.00819905	0.00869539	0.000339797	0.0439681	0.00626997	0.212519	0.0636173	118.197	4.87413	0.00313627	0.000414857	52.9671	7.81721	55.8055	2.17148	-403.602	383.258	-13.8269	105.359	63.2617	8.35631
7	94-35-z2	2022-06-20 20:52:20	18.123	56.1478	2830.51	80.6498	38.4464	0.476708	0.05858	0.00824289	0.00865479	0.00035228	0.0489928	0.0071569	-0.0967938	0.427826	119.071	4.99277	0.00327941	0.000472807	57.1329	7.87673	55.5438	2.2514	4.02739	330.788	1379.15	97.2186	66.1267	9.51954
8	94-35-z3	2022-06-20 21:22:20	13.764	41.4496	2363.43	69.1232	27.1592	0.39291	0.0623104	0.0100093	0.00870969	0.0004097	0.053128	0.0085251	0.0478858	0.18448	118.016	5.43096	0.00262592	0.000672585	60.6212	9.60473	55.8944	2.61793	115.315	357.817	48.471	92.2029	52.9295	13.5528
9	94-35-z4	2022-06-20 21:52:27	22.573	51.2248	2535.13	74.9638	41.5149	0.5538	0.0587945	0.00709076	0.00854351	0.000273712	0.0510927	0.00653011	0.00135036	0.260862	119.837	3.95223	0.00267765	0.000336918	57.3978	6.77475	54.8349	1.74913	54.7952	287.889	100.073	95.5348	54.0181	6.78993
10	94-35-z1	2022-06-21 17:42:34	24.317	0.10126	3299.49	67.3912	30.4664	0.452083	0.0577484	0.00608681	0.00870066	0.000292464	0.0500217	0.00502586	0.000363819	0.253062	117.85	4.02064	0.00268557	0.000342911	56.5845	5.82088	55.8386	1.86887	-65.0134	248.614	-85.8879	98.6818	54.1763	6.91019
11	94-35-z2	2022-06-21 18:18:24	17.114	37.7932	4078.65	81.4622	38.9343	0.477943	0.0600331	0.00691051	0.00870671	0.000305137	0.0512929	0.00586447	0.0110985	0.348619	116.729	3.91665	0.00253349	0.000354557	58.8008	6.61772	55.8788	1.94973	-132.116	333.497	-42.2953	95.0307	51.118	7.14767
12	94-35-z3	2022-06-21 18:48:25	6.194	11.8271	4468.18	103.732	62.7736	0.60515	0.056225	0.00750967	0.00850138	0.000434866	0.0486798	0.00676157	0.0541724	0.31806	119.921	6.56167	0.00248156	0.000315359	55.3722	7.18303	54.5676	2.77988	-123.107	356.952	-44.3253	98.547	50.089	6.35946
13	94-35-z4	2022-06-21 19:18:12	14.728	-20.0839	3055.85	66.1613	30.0671	0.454451	0.0568251	0.00894901	0.00868479	0.00031993	0.0482035	0.00731364	0.0870961	0.133647	116.664	3.95258	0.00309202	0.000458545	55.5087	8.57933	55.739	2.0442	204.139	314.347	27.3044	100.415	62.3647	9.23467
	TanBrown
1	TanBrown-1	2022-06-20 16:32:48	24.521	147.741	819456	381.686	282.843	0.741034	10.9241	0.305296	0.470593	0.00696997	0.168182	0.00153777	0.558972	0.562759	2.13352	0.0315097	0.153032	0.00372866	2515.38	25.9197	2484.84	30.4999	2536.85	15.3158	97.9495	98.7857	2875.66	65.4825
2	TanBrown-2	2022-06-20 17:09:15	10.173	79.2228	590029	246.337	179.284	0.727799	10.6701	0.311223	0.472706	0.00881381	0.164254	0.00203786	0.823728	0.505455	2.12219	0.0388257	0.142645	0.00300398	2493.93	26.9915	2494.35	38.3867	2497.49	20.761	99.8741	100.017	2694.62	53.1556
3	TanBrown-3	2022-06-20 17:39:10	16.748	80.7894	814004	376.509	322.235	0.855849	10.8523	0.315345	0.475786	0.00850667	0.166538	0.00210479	0.659039	0.533489	2.11173	0.0371656	0.140569	0.00286047	2509.12	26.9147	2507.29	37.0139	2519.46	21.2793	99.5166	99.9269	2657.61	50.6014
4	TanBrown-4	2022-06-20 18:09:29	10.318	-26.3844	634604	272.67	260.847	0.956642	10.8124	0.315123	0.475244	0.00863515	0.164713	0.00248452	0.744902	0.707909	2.11088	0.0396264	0.139694	0.0027822	2506.21	27.2462	2505.48	37.8845	2501.22	25.3817	100.17	99.9709	2642.45	49.3339
5	TanBrown-5	2022-06-20 18:38:30	21.692	47.3996	649617	308.708	270.548	0.87639	10.9846	0.321253	0.480205	0.00743226	0.165001	0.00171825	0.722724	0.299149	2.09128	0.033306	0.139558	0.0026107	2519.79	27.3346	2526.76	32.4757	2504.35	17.4984	100.895	100.276	2639.69	46.1905
6	TanBrown-1	2022-06-20 20:17:19	24.429	48.285	943841	470.133	344.315	0.732377	10.8247	0.265362	0.478477	0.0063197	0.164019	0.00168008	0.69761	0.437947	2.09637	0.0272682	0.136927	0.00373966	2507.02	22.7257	2519.58	27.4673	2494.99	17.1424	100.986	100.501	2593.13	66.4212
7	TanBrown-2	2022-06-20 20:53:12	17.9	-39.9411	549029	272.663	192.277	0.70518	10.7469	0.274924	0.471104	0.00740926	0.165463	0.00193657	0.67613	0.324966	2.13107	0.0340669	0.139067	0.00395845	2500.13	23.7845	2487.11	32.5152	2509.48	19.9301	99.1088	99.4793	2631.09	70.189
8	TanBrown-3	2022-06-20 21:23:05	14.112	-11.3796	644783	339.222	284.943	0.83999	11.0175	0.305969	0.481821	0.00939744	0.165518	0.002133	0.785472	0.430787	2.08648	0.04009	0.143258	0.00447313	2522.68	25.775	2533.37	40.7133	2509.98	21.8247	100.932	100.424	2705	79.0771
9	TanBrown-4	2022-06-20 21:53:18	18.276	-19.9581	446952	222.305	161.603	0.726941	10.9774	0.280925	0.482687	0.00796064	0.16518	0.00186299	0.769721	0.43544	2.07588	0.0323611	0.141599	0.0040826	2519.8	23.9452	2537.4	34.5752	2506.78	19.0151	101.221	100.698	2675.85	72.173
10	TanBrown-2	2022-06-21 18:19:09	7.681	-38.0556	745212	288.954	183.018	0.633383	10.7477	0.503049	0.474351	0.0124808	0.164922	0.00351696	0.618555	0.7127	2.11824	0.0574372	0.136436	0.0064688	2500.53	43.3723	2501.06	54.768	2503.08	35.9573	99.9192	100.021	2584.37	115.007
11	TanBrown-3	2022-06-21 18:49:16	18.831	-36.0228	855510	325.798	292.316	0.89723	11.1367	0.502077	0.484608	0.00851385	0.166612	0.00245794	0.606853	0.563984	2.06927	0.0364852	0.141204	0.00618473	2533.58	41.9715	2546.35	36.951	2523.83	23.5991	100.892	100.504	2668.99	109.391
12	TanBrown-4	2022-06-21 19:18:57	12.723	-33.5915	305031	120.116	103.255	0.859627	10.9499	0.516506	0.479193	0.0114398	0.166468	0.00321375	0.657018	0.527793	2.09912	0.049335	0.139199	0.00649267	2516.91	43.4768	2521.74	49.6265	2518.1	31.7435	100.145	100.192	2633.08	115.03
13	TanBrown-6	2022-06-21 20:08:55	13.093	23.9706	349009	130.037	142.094	1.09272	10.8801	0.49518	0.475696	0.00961342	0.165712	0.00274928	0.609924	0.602675	2.10971	0.043062	0.135865	0.00596571	2511.93	42.6904	2507.3	42.0188	2515.67	26.1664	99.6676	99.816	2574.44	106.338
14	TanBrown-7	2022-06-21 20:15:26	24	49.0531	268200	104.317	90.8202	0.870619	10.9513	0.497446	0.480011	0.00944632	0.165523	0.00272155	0.594966	0.573505	2.09132	0.0397625	0.139899	0.0061481	2517.27	42.3874	2525.32	41.0782	2508.01	28.0766	100.69	100.32	2645.61	108.919
15	TanBrown-5	2022-06-21 19:58:11	8.739	229.948	686052	288.016	185.53	0.644164	9.66975	0.487883	0.424932	0.0105612	0.165169	0.0033934	0.735473	0.113149	2.36381	0.0569913	0.152873	0.0100442	2401.05	46.5346	2281.52	47.504	2505.5	34.2729	91.0605	95.0219	2870.36	176.374
	R33 zircon
1	R33-1	2022-06-20 16:33:58	13.343	49.5586	41418.4	140.2	85.2554	0.608099	0.492151	0.0203762	0.0665271	0.00168938	0.0541024	0.00163362	0.465128	0.32258	15.1686	0.382071	0.220967	0.000882804	405.429	13.9197	415	10.2022	350.319	69.975	118.464	102.361	476.786	17.41
2	R33-2	2022-06-20 16:59:14	16.668	-35.9462	73528.7	230.205	171.449	0.744767	0.503665	0.0190718	0.0659848	0.00157241	0.0557085	0.00150915	0.449568	0.42854	15.3038	0.359029	0.256708	0.000717881	414.88	13.5755	412	9.49797	425.283	65.5547	96.8767	99.3058	456.904	14.1796
3	R33-3	2022-06-20 17:28:27	13.944	69.6196	51799.7	169.916	103.122	0.606899	0.498611	0.0227567	0.0658879	0.00211919	0.0551743	0.00161218	0.512551	0.080776	15.3566	0.537008	0.245605	0.000908147	409.562	15.5594	411	12.8295	413.337	70.4127	99.4345	100.351	449.71	17.9066
4	R33-4	2022-06-20 17:58:36	16.391	14.44	42631.6	143.552	89.7718	0.625363	0.499029	0.0205111	0.0657093	0.00199498	0.0556477	0.00197525	0.371233	0.504285	15.5103	0.495352	0.214561	0.000823387	410.011	13.9275	410	12.7152	401.008	77.0745	102.242	99.9973	451.218	16.2669
5	R33-5	2022-06-20 18:29:23	22.272	-32.7249	43775.8	151.517	93.3163	0.615879	0.498361	0.0201781	0.0663064	0.00153155	0.0545485	0.00158762	0.484931	0.259347	15.2995	0.397033	0.229	0.000811236	408.93	13.7021	414	9.27217	353.545	65.4073	117.1	101.24	491.796	16.0067
6	R33-6	2022-06-20 18:59:26	23.15	18.3313	92128.5	315.979	250.081	0.791449	0.502764	0.017132	0.0661387	0.00152266	0.0559937	0.00145918	0.302847	0.531632	15.2671	0.333236	0.292718	0.000576237	412.77	11.5495	413	9.19205	421.384	58.8419	98.0103	100.056	484.69	11.3632
7	R33-1	2022-06-20 20:18:30	22.254	5.15202	20853	75.2991	34.2239	0.454507	0.504505	0.0207854	0.0675531	0.0016795	0.0546971	0.00203385	0.250113	0.359711	15.0551	0.397288	0.169373	0.00117545	412.271	14.0483	421.177	10.1476	324.976	81.9608	129.602	102.16	465.776	23.1833
8	R33-2	2022-06-20 20:43:04	22.762	23.2793	28619.6	107.959	56.9118	0.52716	0.497474	0.0194208	0.0659748	0.00147404	0.0546976	0.00164144	0.593236	0.160827	15.3687	0.366077	0.199259	0.00101132	408.328	13.2367	411.693	8.93101	367.785	67.6202	111.938	100.824	438.162	19.9506
9	R33-3	2022-06-20 21:12:23	23.639	12.8427	72948.9	275.883	237.118	0.859487	0.510798	0.0156629	0.0672004	0.00146559	0.0552849	0.00129807	0.612087	0.443056	15.0835	0.337499	0.276796	0.000744759	417.976	10.5583	419.088	8.85257	418.079	51.7061	100.241	100.266	456.48	14.7167
10	R33-5	2022-06-20 22:12:38	15.606	14.1834	24853.2	96.142	52.7308	0.548468	0.529387	0.0259321	0.0667638	0.00179164	0.0579237	0.0025039	0.244282	0.206436	15.1543	0.425448	0.188596	0.00121647	428.898	17.2524	416.479	10.8325	462.384	100.926	90.072	97.1044	453.382	24.023
11	R33-1	2022-06-21 17:44:29	15.19	-24.6511	27299.5	76.0934	34.0784	0.44785	0.507934	0.0298189	0.0656311	0.00197804	0.056415	0.00228048	0.493584	0.304767	15.4831	0.46347	0.177877	0.00129075	415.887	20.2347	409.596	11.9704	439.386	85.1739	93.22	98.4873	466.507	25.4753
12	R33-2	2022-06-21 18:09:17	21.192	-29.4854	60356	158.312	116.824	0.737931	0.497816	0.0259119	0.066021	0.00190339	0.0548558	0.00166504	0.6553	0.407033	15.4075	0.424164	0.243958	0.00115858	408.894	17.676	411.927	11.498	382.255	69.6919	107.762	100.742	456.869	22.8849
13	R33-3	2022-06-21 18:38:24	12.096	104.52	60728.5	175.879	114.577	0.651456	0.505927	0.0330671	0.0661466	0.00252284	0.0550781	0.00195141	0.718803	-0.00932746	15.2984	0.550446	0.235414	0.00126962	413.712	22.1305	412.664	15.2367	388.471	78.9539	106.228	99.7465	453.217	25.0712
14	R33-4	2022-06-21 19:08:18	12.143	-55.7186	24847.2	72.4943	30.4308	0.419769	0.521715	0.0320779	0.0657982	0.00229895	0.0578076	0.00254377	0.409016	0.370027	15.4349	0.5445	0.145254	0.00142623	424.653	21.255	410.602	13.889	480.714	96.9736	85.4149	96.691	429.445	28.1548
15	R33-5	2022-06-21 19:39:06	19.964	10.3227	93636.3	270.225	211.68	0.783346	0.508019	0.025378	0.0658681	0.00175215	0.0567294	0.00156428	0.620165	0.459123	15.2007	0.399471	0.305305	0.00112357	416.258	17.1309	411.063	10.5922	471.085	62.3043	87.2588	98.752	475.136	22.1796
16	R33-4	2022-06-20 21:42:34	9.603	-65.1254	18987.8	75.7271	37.0264	0.488945	0.54208	0.0340182	0.0669622	0.00223847	0.0590888	0.00331151	0.420053	0.214082	15.1162	0.478065	0.174332	0.00185472	437.401	22.217	417.663	13.4922	522.258	129.116	79.9727	95.4875	487.051	36.5985
	QGNG zircon
1	QGNG-1	2022-06-20 16:34:42	23.18	-21.0568	522889	351.062	317.938	0.905648	5.08903	0.153312	0.330436	0.00673891	0.11186	0.00170133	0.564986	0.537614	3.05542	0.0630316	0.115361	0.00278993	1831.92	25.8072	1838.61	32.6187	1826.18	26.6467	100.68	100.365	2205.37	50.3149
2	QGNG-2	2022-06-20 16:58:24	16.14	69.3714	938298	597.235	594.272	0.995038	5.12679	0.149582	0.331621	0.00642468	0.112277	0.00196228	0.35913	0.68741	3.03294	0.0583761	0.112233	0.00273546	1839.33	24.7848	1845.08	31.0455	1829.31	31.6715	100.862	100.313	2149.05	49.5169
3	QGNG-3	2022-06-20 17:29:11	22.532	24.3782	859316	529.281	523.318	0.988735	5.14652	0.148092	0.333772	0.00565894	0.112284	0.00171341	0.382727	0.647945	3.00646	0.0496549	0.11334	0.00250237	1842.36	24.3782	1855.51	27.362	1829.23	27.5497	101.437	100.714	2169.08	45.2696
4	QGNG-4	2022-06-20 17:59:18	19.756	11.4735	960886	637.642	694.459	1.08911	5.22294	0.150792	0.330715	0.00589718	0.114662	0.00172029	0.425414	0.63522	3.04006	0.051943	0.115329	0.00261919	1855.03	24.5968	1840.74	28.3677	1872.22	26.1904	98.3182	99.2295	2205.17	47.4326
5	QGNG-5	2022-06-20 18:28:39	17.205	93.7559	739375	502.032	465.288	0.926811	5.16579	0.153759	0.333406	0.00662177	0.112696	0.00171081	0.580848	0.611069	3.01859	0.0583835	0.112466	0.00285606	1845.43	25.2246	1853.55	31.8529	1837.39	27.7126	100.88	100.44	2153.09	51.7321
6	QGNG-6	2022-06-20 18:58:41	16.934	30.2347	2.08653e+06	1506.94	1003.34	0.665813	5.2141	0.150162	0.331959	0.00614747	0.114682	0.00224933	0.0830077	0.782808	3.02054	0.0570883	0.114743	0.00329128	1853.81	24.4512	1846.81	29.6311	1871.96	34.1536	98.6563	99.6221	2194.02	59.3718
7	QGNG-1	2022-06-20 20:19:14	24	7.68026	1.15224e+06	819.305	592.665	0.723376	5.26419	0.131422	0.332613	0.00506645	0.11498	0.00167489	0.366775	0.716205	3.02084	0.0458208	0.1151	0.00346702	1861.87	21.2684	1850.07	24.4693	1873.27	26.3205	98.7619	99.3662	2201	62.7021
8	QGNG-2	2022-06-20 20:42:20	24	-13.3408	1.37418e+06	966.591	453.343	0.469013	5.27223	0.135026	0.334846	0.00553745	0.114197	0.00178186	0.297413	0.511761	3.0041	0.0486958	0.110101	0.00347602	1862.84	21.6523	1860.61	26.6319	1859.92	28.1789	100.037	99.8803	2109.99	63.0962
9	QGNG-3	2022-06-20 21:13:08	24.239	6.26809	1.22531e+06	901.119	729.818	0.809902	5.23738	0.131765	0.330832	0.00531557	0.114329	0.00170774	0.627328	0.646713	3.03913	0.0473527	0.113493	0.00326658	1857.42	21.2586	1841.3	25.5985	1866.68	25.9316	98.6403	99.1323	2172.11	59.3492
10	QGNG-4	2022-06-20 21:43:18	10.111	41.267	1.13428e+06	891.455	434.396	0.487288	5.25974	0.15422	0.333391	0.00721302	0.115211	0.00261858	0.338502	0.600528	3.01478	0.0671855	0.114878	0.00457599	1860.8	24.9728	1853.8	34.9595	1875.78	41.7581	98.8279	99.6237	2196.64	82.884
11	QGNG-5	2022-06-20 22:11:52	23.704	9.83912	1.24308e+06	917.736	420.974	0.458709	5.19393	0.132112	0.334004	0.00580307	0.113491	0.00193363	0.34442	0.651837	3.00713	0.049819	0.112154	0.00345631	1850.17	21.9394	1856.4	27.9734	1847.23	30.9876	100.496	100.337	2147.46	62.5306
12	QGNG-1	2022-06-21 17:45:14	24.522	-59.7906	2.1193e+06	1200.88	852.824	0.710166	5.2201	0.237156	0.334002	0.00706374	0.113609	0.00209508	0.50447	0.411672	3.01135	0.0648629	0.112015	0.00509702	1854.38	38.9882	1856.16	34.0156	1850.09	33.5027	100.328	100.096	2144.89	92.6127
13	QGNG-2	2022-06-21 18:08:31	13.846	-7.58156	2.12713e+06	1208.11	959.308	0.794059	5.19615	0.24312	0.332765	0.00762013	0.113679	0.00246835	0.347008	0.658071	3.01128	0.0652182	0.108601	0.00524317	1850.39	39.9842	1850.63	36.8425	1851.91	39.2001	99.9307	100.013	2082.86	95.37
14	QGNG-3	2022-06-21 18:39:09	17.877	-54.6391	1.85605e+06	1090.24	819.919	0.752054	5.22186	0.241659	0.3287	0.00654575	0.114487	0.00237706	0.321409	0.589274	3.04996	0.0631494	0.111175	0.0052673	1854.49	39.5144	1831.17	31.719	1863.74	37.4857	98.2527	98.743	2129.56	95.4039
15	QGNG-4	2022-06-21 19:09:02	20.397	-42.9068	1.41079e+06	795.059	359.508	0.452178	5.16876	0.236726	0.333274	0.00744101	0.113185	0.00248592	0.274183	0.704803	3.02331	0.0651389	0.11466	0.0052729	1845.95	38.8649	1852.66	35.7509	1846.02	38.0289	100.36	100.364	2192.96	95.4655
16	QGNG-5	2022-06-21 19:38:22	15.275	-11.4404	1.90936e+06	1108.44	467.537	0.421798	5.25226	0.241039	0.331265	0.00701985	0.115273	0.00248223	0.249768	0.654605	3.02597	0.0663875	0.113927	0.00534038	1859.92	39.2662	1848.18	35.8562	1881.68	41.1153	98.2201	99.3691	2179.76	96.8379
	91500 zircon
1	91500-2	2022-06-20 16:27:19	24	0.883702	64487.2	79.0553	30.0591	0.380229	1.85591	0.0561065	0.181056	0.00266033	0.0746336	0.00132468	0.18272	0.489944	5.5352	0.0787962	0.0538441	0.00160536	1064.05	19.8074	1072.45	14.5168	1046.17	35.3863	102.512	100.79	1059.43	30.7489
2	91500-3	2022-06-20 16:28:02	24	-11.559	64805.6	80.1142	29.712	0.370871	1.85024	0.0584823	0.178213	0.00254055	0.0753171	0.00119614	0.480648	0.164507	5.61356	0.0862269	0.0525734	0.00162369	1061.43	21.1634	1056.95	13.8985	1066.63	32.4556	99.0919	99.5778	1035.02	31.2094
3	91500-4	2022-06-20 16:28:45	24	-38.6683	65517.6	80.4769	30.0734	0.37369	1.8448	0.0566316	0.178498	0.0025756	0.075156	0.00132128	0.240405	0.399426	5.62267	0.0820163	0.053418	0.00175228	1059.91	20.1106	1058.5	14.092	1060.3	35.3653	99.8301	99.8668	1051.12	33.6188
4	91500-5	2022-06-20 16:29:28	24	29.0359	65866.8	80.7425	30.2013	0.374044	1.83973	0.0573254	0.178581	0.00261655	0.0748453	0.00128481	0.351896	0.311582	5.62105	0.0827552	0.0541271	0.00160376	1057.91	20.4854	1058.94	14.3079	1052.37	34.9307	100.624	100.097	1064.86	30.7399
5	91500-6	2022-06-20 16:39:30	24	-4.5251	66352.1	79.2202	30.0713	0.379591	1.88366	0.0591739	0.18016	0.0027725	0.0755668	0.00143851	0.25537	0.428719	5.5751	0.0848559	0.05419	0.00173362	1073.36	20.8679	1067.52	15.1205	1074.44	37.5299	99.3554	99.4555	1065.95	33.2424
6	91500-7	2022-06-20 16:40:12	24	14.5045	66825.3	80.4425	29.8463	0.371027	1.8382	0.055663	0.179049	0.00269181	0.0741534	0.00125704	0.284481	0.449138	5.60819	0.0844074	0.0548391	0.00164142	1057.72	19.8391	1061.47	14.7101	1034.03	34.2994	102.654	100.355	1078.48	31.4567
7	91500-8	2022-06-20 16:50:02	24	31.4954	68603.9	80.4421	30.2795	0.376414	1.85099	0.0569929	0.178938	0.00254987	0.074506	0.00122723	0.347263	0.264653	5.6079	0.0804917	0.0533421	0.00167666	1062.05	20.4307	1060.92	13.9407	1043.9	34.1477	101.63	99.8931	1049.74	32.1777
8	91500-9	2022-06-20 16:50:44	24	-27.4485	68550.9	79.7454	29.8401	0.374192	1.8418	0.05482	0.179622	0.00254642	0.0739702	0.00109734	0.328832	0.375983	5.58623	0.0798691	0.0544718	0.00151366	1060.55	20.2228	1064.66	13.9173	1031.63	30.1517	103.201	100.387	1071.55	29.0038
9	91500-10	2022-06-20 17:00:17	24	20.9048	69644.7	80.3322	30.0085	0.373555	1.85739	0.0578864	0.178726	0.00257829	0.0753591	0.00138834	0.231907	0.372778	5.61539	0.0815117	0.0540681	0.00164987	1064.17	20.7261	1059.75	14.0978	1064.37	37.4577	99.5657	99.5842	1063.69	31.6258
10	91500-11	2022-06-20 17:01:00	24	2.05948	69175.9	79.7229	30.0735	0.377225	1.84564	0.0570847	0.179284	0.00258996	0.0747352	0.00135753	0.269396	0.343849	5.59848	0.0831163	0.0524547	0.00159222	1061.78	19.6468	1062.79	14.1802	1052.97	38.2405	100.933	100.095	1032.77	30.5566
11	91500-12	2022-06-20 17:10:04	24	-31.7614	68630.3	79.3932	29.7181	0.374315	1.86275	0.0588754	0.178922	0.00271959	0.0755717	0.00148177	0.17322	0.452106	5.61302	0.0854947	0.0547006	0.00175332	1065.9	20.9496	1060.76	14.8611	1073.12	40.4498	98.8486	99.518	1075.72	33.5284
12	91500-13	2022-06-20 17:10:47	24	-5.56561	70326.3	81.6385	30.7203	0.376297	1.82527	0.0577602	0.178662	0.00268346	0.0741689	0.00118079	0.464113	0.15876	5.62028	0.0846571	0.0542278	0.00163248	1052.55	20.7272	1059.36	14.6686	1035.69	32.4409	102.285	100.647	1066.77	31.3052
13	91500-14	2022-06-20 17:19:59	24	10.6499	68892.5	79.1886	29.8266	0.376653	1.85503	0.0577795	0.180521	0.00270178	0.0744538	0.00127378	0.340218	0.350415	5.56233	0.0840617	0.0540227	0.00162692	1063.35	20.6394	1069.51	14.755	1046.02	35.9511	102.245	100.58	1062.84	31.1965
14	91500-15	2022-06-20 17:20:41	24	-64.4412	68496	79.8763	29.9243	0.374633	1.85634	0.0585882	0.178629	0.00274218	0.075496	0.00139344	0.311067	0.355805	5.62282	0.0858516	0.0523474	0.00163064	1063.65	20.8371	1059.15	14.9787	1067.95	37.5248	99.1763	99.5767	1030.68	31.3024
15	91500-16	2022-06-20 17:30:19	24	24.3943	71323.5	81.0189	30.1858	0.372577	1.85623	0.0572231	0.178779	0.00265434	0.0753016	0.00127862	0.317947	0.378203	5.6061	0.0810911	0.0535373	0.00190186	1063.9	20.4849	1060.01	14.5196	1069.01	35.2869	99.1582	99.6343	1053.26	36.4872
16	91500-17	2022-06-20 17:31:02	24	42.6786	71158.3	80.154	30.29	0.377898	1.84839	0.0553643	0.179584	0.00267707	0.074977	0.00119598	0.363574	0.390018	5.59026	0.0812628	0.0538676	0.0015549	1062.79	20.323	1064.4	14.592	1057.73	31.8459	100.631	100.152	1059.93	29.7782
17	91500-18	2022-06-20 17:40:13	24	9.14606	67393.2	78.8534	29.7325	0.377061	1.88691	0.0569732	0.18079	0.00278899	0.0761772	0.0012902	0.330166	0.483686	5.55554	0.0836457	0.052979	0.00165468	1074.99	20.0373	1070.95	15.1871	1093.41	32.2835	97.9457	99.624	1042.79	31.7236
18	91500-19	2022-06-20 17:40:56	24	-88.6508	67507.8	80.4206	30.0758	0.373981	1.80667	0.0549972	0.17801	0.0026658	0.0740494	0.00129012	0.265881	0.46216	5.64062	0.0846781	0.0537621	0.00185469	1047.71	20.4965	1055.79	14.5779	1035.42	36.163	101.968	100.772	1057.62	35.5521
19	91500-20	2022-06-20 17:50:07	24	2.56492	67966.3	80.9552	30.4697	0.376377	1.84222	0.055924	0.177995	0.00277382	0.0755763	0.00120601	0.427953	0.338404	5.64401	0.0872411	0.0538781	0.00177771	1060.46	20.7462	1055.67	15.1583	1073.54	32.3258	98.3354	99.5486	1059.93	34.0591
20	91500-21	2022-06-20 17:50:49	24	-10.9752	67040.4	79.7052	29.6885	0.372479	1.84747	0.0567032	0.178735	0.00229758	0.0752477	0.00125902	0.274362	0.279134	5.60092	0.0740406	0.0542437	0.00175197	1060.85	20.2591	1059.89	12.5547	1063.8	33.8764	99.6324	99.9094	1066.96	33.5519
21	91500-22	2022-06-20 18:00:26	24	17.3903	65559.1	79.117	29.9562	0.378632	1.86707	0.0591072	0.179873	0.00288799	0.075347	0.00128627	0.492741	0.224693	5.5872	0.0879212	0.0535363	0.00167111	1067.44	20.7456	1065.9	15.7429	1066.23	33.9981	99.9693	99.8556	1053.47	31.9992
22	91500-23	2022-06-20 18:01:09	24	24.7425	66675.7	80.3518	30.0572	0.37407	1.8604	0.0572697	0.180923	0.00265459	0.0745416	0.00135688	0.260513	0.407096	5.54028	0.0823109	0.0539493	0.00150392	1066.88	21.0373	1073.31	14.9821	1042.61	37.3116	102.944	100.602	1061.54	28.8553
23	91500-24	2022-06-20 18:10:18	24	-70.0249	67086.4	80.6248	29.9434	0.371392	1.83552	0.0561164	0.178235	0.00244496	0.0745802	0.00127121	0.265924	0.372308	5.61139	0.0761877	0.0548065	0.00163831	1056.64	20.0626	1057.11	13.3712	1045.54	34.329	101.106	100.044	1077.86	31.3627
24	91500-25	2022-06-20 18:11:01	24	-24.0782	66486.4	79.6659	30.1122	0.37798	1.8511	0.0578882	0.179527	0.00264297	0.0746511	0.00133512	0.35233	0.345462	5.5916	0.0819876	0.0543702	0.0016928	1061.88	20.8824	1064.1	14.4328	1051.64	35.0383	101.185	100.209	1069.45	32.4056
25	91500-26	2022-06-20 18:20:15	24	36.365	64834.6	79.5195	29.9019	0.376032	1.85746	0.0571865	0.179769	0.00266588	0.0751723	0.00128541	0.322345	0.377967	5.57478	0.0808535	0.052583	0.00168785	1064.38	20.3616	1065.42	14.581	1061.32	34.8092	100.387	100.098	1035.16	32.4009
26	91500-27	2022-06-20 18:20:58	24	-35.1299	64963.5	79.9674	29.9568	0.374613	1.84121	0.0591903	0.178367	0.00257825	0.0750666	0.0012955	0.543343	0.0915606	5.62678	0.0815987	0.0534127	0.00175487	1058.05	21.0761	1057.78	14.1	1058.21	35.0532	99.9592	99.9747	1051.02	33.6443
27	91500-28	2022-06-20 18:30:32	24	92.4946	65283.4	80.9409	30.4861	0.376646	1.85546	0.0571339	0.178082	0.00262493	0.0757041	0.00129569	0.213131	0.44854	5.6193	0.0822187	0.0518791	0.00168234	1063.63	20.5512	1056.21	14.358	1075.34	34.9082	98.221	99.3022	1021.63	32.2889
28	91500-29	2022-06-20 18:31:14	24	58.7041	65436.6	79.6862	29.9114	0.375365	1.85982	0.0559025	0.180344	0.00257834	0.0746558	0.00133576	0.115324	0.507802	5.56466	0.0811069	0.0537275	0.0016773	1065.49	19.8341	1068.59	14.0936	1052.26	34.7917	101.552	100.291	1057.13	32.1253
29	91500-30	2022-06-20 18:40:20	24	-23.1428	63005.6	79.5621	30.1074	0.378414	1.8428	0.0566123	0.179258	0.00266353	0.0742096	0.00123523	0.401788	0.297086	5.592	0.0869323	0.0529992	0.00154195	1060.61	20.8234	1062.63	14.5614	1036.19	33.0722	102.551	100.19	1043.27	29.5785
30	91500-31	2022-06-20 18:41:03	24	-6.62958	63154.7	80.2237	29.7778	0.371185	1.827	0.0562271	0.179195	0.00262104	0.073623	0.00132615	0.237944	0.419484	5.60165	0.0822646	0.0550841	0.00174348	1053.51	20.1269	1062.29	14.3239	1018.21	36.0853	104.33	100.833	1083.08	33.3444
31	91500-32	2022-06-20 18:50:14	24	10.0192	63476.4	80.7838	30.2378	0.374306	1.85783	0.0579483	0.17932	0.00270407	0.0750115	0.00117851	0.447357	0.261992	5.58947	0.080675	0.0535625	0.00188845	1064.35	20.4859	1062.95	14.7719	1063.05	32.7452	99.9906	99.8689	1053.76	36.2064
32	91500-33	2022-06-20 18:50:57	24	3.34073	62268	79.0296	29.7394	0.376307	1.84806	0.0577381	0.178884	0.00264442	0.0750042	0.00121856	0.458694	0.21413	5.61202	0.0827667	0.0531877	0.00175497	1060.84	20.6305	1060.59	14.4485	1057.99	32.7006	100.245	99.9761	1046.7	33.6362
33	91500-34	2022-06-20 19:00:35	24	42.901	63988.7	79.5005	29.9334	0.376519	1.85359	0.0564948	0.179015	0.00254535	0.0752423	0.0012573	0.264218	0.407617	5.59793	0.0821968	0.0548279	0.00183072	1063.11	20.1096	1062.82	14.4091	1067.87	34.4929	99.5275	99.9727	1078.09	35.0444
34	91500-35	2022-06-20 19:01:18	24	-18.884	65188.6	80.6932	30.197	0.37422	1.86712	0.0569529	0.179208	0.00259274	0.0755228	0.00116873	0.397021	0.394242	5.58385	0.086769	0.0538957	0.0016216	1067.92	19.9669	1062.37	14.1734	1081.26	31.3119	98.2534	99.4807	1060.41	31.1023
35	91500-36	2022-06-20 19:10:32	24	-33.7082	63428.4	81.5178	30.4371	0.37338	1.84852	0.0568732	0.179475	0.00241457	0.0744346	0.00127799	0.182778	0.394649	5.58746	0.0758361	0.0548187	0.00178596	1061.2	20.2471	1063.9	13.2001	1050.08	35.1678	101.316	100.254	1077.95	34.2074
36	91500-37	2022-06-20 19:11:15	24	18.5097	61738.9	78.8033	29.5184	0.374583	1.83692	0.054879	0.180784	0.00264421	0.0739721	0.00117577	0.43972	0.288644	5.5434	0.0791713	0.0541951	0.00166955	1057.4	19.6935	1070.97	14.4437	1035.13	30.8685	103.462	101.284	1066.11	31.9685
37	91500-38	2022-06-20 19:11:58	24	-61.6185	60676.8	79.791	30.1538	0.37791	1.8562	0.0587286	0.1773	0.00262596	0.0754057	0.00139921	0.363917	0.288263	5.65292	0.082205	0.0528969	0.00171056	1063.55	21.0808	1051.92	14.3929	1076.32	35.5643	97.7329	98.9064	1041.16	32.7896
38	91500-1	2022-06-20 20:11:07	24	44.7158	60483.8	81.3375	30.13	0.370432	1.85739	0.0560485	0.179048	0.00262763	0.0754976	0.00142704	0.479311	0.199223	5.60867	0.080954	0.0549705	0.00224533	1063.52	19.7702	1061.45	14.3385	1068.51	38.4394	99.3398	99.8057	1080.73	42.9431
39	91500-2	2022-06-20 20:11:50	24	7.08285	58917.7	78.3142	29.7028	0.379278	1.84305	0.0536817	0.179879	0.00267393	0.0744038	0.00152843	0.23505	0.404869	5.58399	0.0828476	0.0538075	0.00218543	1058.82	19.013	1065.98	14.5918	1042.15	40.2457	102.287	100.676	1058.48	41.9222
40	91500-3	2022-06-20 20:12:33	24	4.99999	59400.7	78.7549	30.1099	0.382324	1.88749	0.0533192	0.179654	0.00240045	0.076106	0.00141068	0.280314	0.349059	5.57697	0.0781686	0.0520109	0.00191868	1074.86	18.6686	1064.85	13.1307	1085.37	37.3788	98.109	99.0683	1024.27	36.805
41	91500-4	2022-06-20 20:13:16	24	-18.7713	60177.9	79.8101	29.9784	0.375621	1.84359	0.0523655	0.179342	0.00244208	0.074566	0.00137902	0.297891	0.308376	5.59485	0.076227	0.0540038	0.00209793	1059.23	18.8567	1063.13	13.3406	1043.85	38.3483	101.847	100.368	1062.36	40.1977
42	91500-5	2022-06-20 20:13:59	24	21.5407	60623.1	80.4152	30.0635	0.373854	1.84415	0.0514083	0.178313	0.00258444	0.0750874	0.00133102	0.390773	0.329145	5.62263	0.0835021	0.0544301	0.00203559	1061.14	19.1526	1057.45	14.125	1059.1	36.4745	99.8438	99.6518	1070.61	38.992
43	91500-6	2022-06-20 20:24:00	24	-23.9225	61801.2	79.9789	29.9858	0.374921	1.83747	0.0531325	0.17994	0.00274076	0.0741254	0.00146802	0.322148	0.397194	5.58404	0.0857783	0.0534318	0.00199999	1056.87	19.2186	1066.29	14.9737	1035.96	39.0204	102.928	100.891	1051.49	38.374
44	91500-7	2022-06-20 20:24:43	24	24.042	61623.3	81.4369	30.0144	0.36856	1.82834	0.0519188	0.17674	0.00278046	0.0748687	0.00128098	0.432592	0.3359	5.67663	0.0865438	0.0547409	0.00211592	1055.35	19.0765	1048.76	15.2285	1063.12	36.2992	98.6495	99.3757	1076.48	40.5719
45	91500-8	2022-06-20 20:33:52	24	-108.016	58581.7	78.2333	29.9187	0.382429	1.8596	0.0556084	0.1794	0.00255511	0.0752506	0.00161139	0.245155	0.350638	5.5963	0.0810697	0.0529155	0.00202584	1064.36	19.8853	1063.41	13.9725	1057.87	43.6382	100.523	99.9106	1045.8	40.2175
46	91500-9	2022-06-20 20:34:35	24	-55.9056	60434.8	80.7105	30.1002	0.372941	1.84741	0.0523752	0.17948	0.00256448	0.0742847	0.00140277	0.256112	0.405055	5.58642	0.0842395	0.0538576	0.00199077	1062.23	17.9932	1065.44	14.5381	1040.56	38.9742	102.392	100.303	1059.67	38.1702
47	91500-10	2022-06-20 20:44:14	24	18.4814	61951	82.0964	30.2511	0.368482	1.84665	0.054397	0.180104	0.00259856	0.0739275	0.00132308	0.487643	0.214205	5.55753	0.0845729	0.0531649	0.00205665	1060.01	19.0233	1068.97	14.7489	1032.42	34.8042	103.541	100.845	1046.29	39.4558
48	91500-11	2022-06-20 20:44:57	24	-6.00019	58873.2	78.2468	29.7093	0.379687	1.86421	0.0538708	0.179314	0.00228893	0.0749779	0.00140069	0.348044	0.236001	5.58464	0.0749987	0.054277	0.00216398	1066.38	19.1763	1063.02	12.5193	1055.22	37.3498	100.74	99.6851	1067.52	41.4774
49	91500-12	2022-06-20 20:54:09	24	-9.66198	59942.4	80.6836	30.0814	0.372831	1.84189	0.0542212	0.178028	0.0026124	0.0752191	0.00136761	0.404902	0.230403	5.64123	0.0829061	0.0538522	0.00183958	1058.24	19.5643	1055.88	14.2874	1062.17	36.9005	99.4073	99.777	1059.72	35.2782
50	91500-13	2022-06-20 20:54:52	24	4.10762	60169.2	79.9809	29.9207	0.374098	1.83924	0.0507596	0.17943	0.00268763	0.0742819	0.00138044	0.207529	0.503069	5.59876	0.0844713	0.0537578	0.00217608	1057.98	18.2044	1063.52	14.6824	1040.33	39.5439	102.229	100.523	1057.54	41.7551
51	91500-14	2022-06-20 21:03:58	24	-7.72098	58635.6	79.4986	29.9553	0.376803	1.85658	0.0534705	0.179359	0.0026565	0.0752182	0.00160483	0.13174	0.461582	5.59014	0.0785907	0.055885	0.00225644	1063.73	18.9821	1063.14	14.4904	1057.58	42.5326	100.526	99.945	1098.25	43.1249
52	91500-15	2022-06-20 21:04:41	24	-17.9902	58451.3	79.9858	30.067	0.375904	1.8456	0.0515751	0.177962	0.00262005	0.075225	0.00127023	0.422161	0.292178	5.64363	0.0834618	0.0534781	0.00200523	1061.65	18.8949	1055.51	14.3335	1068.53	34.7891	98.7813	99.4217	1052.37	38.4986
53	91500-16	2022-06-20 21:14:16	24	37.107	57715.4	78.1309	29.7723	0.381057	1.86702	0.0526104	0.179385	0.00264855	0.0755735	0.00135676	0.448866	0.271003	5.59871	0.0818821	0.0537995	0.00203472	1067.67	18.4396	1063.29	14.4553	1072.36	35.3068	99.1545	99.5894	1058.5	39.018
54	91500-17	2022-06-20 21:14:59	24	0.499445	60398.8	82.0527	30.2625	0.368817	1.8357	0.0527411	0.179141	0.00245813	0.0742927	0.00135742	0.39397	0.194079	5.60216	0.0792259	0.0521233	0.00183556	1057.87	19.4221	1062.02	13.4584	1037.11	37.0031	102.402	100.393	1026.51	35.2432
55	91500-18	2022-06-20 21:24:09	24	-53.1153	58884.7	79.8995	29.9464	0.374801	1.84617	0.0536425	0.179634	0.00256	0.0746806	0.00142985	0.443049	0.186647	5.58867	0.0795667	0.0548476	0.0021202	1061.72	19.7162	1064.68	13.9773	1051.6	37.0268	101.244	100.278	1078.52	40.6154
56	91500-19	2022-06-20 21:24:52	24	-0.13753	59361.8	80.585	30.039	0.372761	1.84072	0.0537154	0.179811	0.00262861	0.0738968	0.0014488	0.332417	0.323531	5.57596	0.0843775	0.0535964	0.00206692	1057.93	19.3066	1065.62	14.3522	1029.7	38.8913	103.488	100.727	1054.57	39.697
57	91500-20	2022-06-20 21:34:04	24	-16.8171	56949.2	79.5245	30.0497	0.377867	1.85389	0.0549136	0.179624	0.00265343	0.0748714	0.00155059	0.258986	0.320066	5.59139	0.0820418	0.0530097	0.00212274	1062.45	19.6019	1064.59	14.4833	1049.07	41.7834	101.48	100.201	1043.24	40.6755
58	91500-21	2022-06-20 21:34:46	24	-3.23737	57093.3	79.6709	29.946	0.375872	1.86778	0.0531702	0.179534	0.00233102	0.0754295	0.00144998	0.236853	0.330083	5.58615	0.0729094	0.0548032	0.00214245	1067.81	18.8701	1064.21	12.7399	1066.5	38.396	99.7852	99.6629	1077.64	40.9962
59	91500-22	2022-06-20 21:44:27	24	5.33113	56154.1	78.5816	29.8189	0.379464	1.86232	0.0544513	0.177209	0.00254572	0.0758095	0.00138682	0.36059	0.344873	5.62561	0.0803263	0.0535521	0.00192067	1065.6	19.3239	1051.42	13.934	1092.4	38.5441	96.2481	98.6693	1053.88	36.8443
60	91500-23	2022-06-20 21:45:09	24	-36.3016	59544.3	82.2421	30.2202	0.367454	1.85771	0.0547973	0.179834	0.0027485	0.0750402	0.00155239	0.342202	0.285553	5.58737	0.0846831	0.0540088	0.0020622	1063.87	19.4486	1065.71	14.9962	1053.67	41.7087	101.143	100.173	1062.49	39.4952
61	91500-24	2022-06-20 21:54:17	24	-9.55733	58641.4	81.0243	29.9997	0.370256	1.82111	0.0539248	0.179075	0.0027894	0.0741451	0.0015322	0.304756	0.367857	5.60272	0.0849995	0.0534333	0.00199776	1050.76	19.4612	1061.54	15.2463	1029.21	42.3355	103.141	101.026	1051.51	38.3345
62	91500-25	2022-06-20 21:55:00	24	-40.8185	57078.9	78.4799	29.9751	0.381946	1.87918	0.0568569	0.179201	0.00278598	0.0763948	0.00157644	0.363048	0.270712	5.6085	0.0865824	0.0540473	0.00215067	1071.17	19.9644	1062.23	15.2114	1089.81	41.2155	97.4691	99.1654	1063.13	41.2188
63	91500-26	2022-06-20 22:04:09	24	-7.79048	59261.3	80.4689	29.9795	0.37256	1.83321	0.0525596	0.179849	0.00272639	0.0741154	0.0013822	0.350404	0.337309	5.57631	0.0817049	0.054808	0.0021617	1057.07	19.4838	1065.8	14.8883	1031.85	37.4782	103.29	100.825	1077.71	41.338
64	91500-27	2022-06-20 22:04:52	24	-56.3962	58604.7	80.3428	30.0404	0.373903	1.8436	0.0523385	0.178934	0.00275481	0.0747778	0.00142061	0.234535	0.431139	5.61641	0.0870278	0.0526103	0.00204604	1059.27	18.6139	1060.78	15.0549	1064.02	39.8616	99.6956	100.143	1035.65	39.289
65	91500-28	2022-06-20 22:14:30	24	13.2231	56575.2	78.536	29.9292	0.381089	1.86597	0.0560921	0.178054	0.00252682	0.0759145	0.00158322	0.309657	0.277929	5.62898	0.0816195	0.0525574	0.00216136	1066.57	19.8685	1056.05	13.802	1076.77	41.7541	98.0755	99.0133	1034.5	41.4283
66	91500-29	2022-06-20 22:15:13	24	-14.8966	58158.7	79.6546	30.1012	0.377897	1.85466	0.0528854	0.180578	0.00264042	0.0743766	0.00132093	0.444405	0.269503	5.55235	0.0809824	0.0545544	0.00209325	1064.78	18.307	1069.81	14.3714	1045.11	34.9576	102.363	100.473	1072.93	40.1411
67	91500-30	2022-06-20 22:15:56	24	5.65294	58547.3	81.5348	29.9736	0.367617	1.84035	0.0520467	0.1789	0.00271876	0.0746629	0.00131374	0.414908	0.234184	5.60673	0.0836632	0.0540556	0.0021326	1058.13	18.682	1060.61	14.8691	1048.32	35.0561	101.173	100.234	1063.31	40.9001
68	91500-1	2022-06-21 17:37:07	24	-48.1362	82159.6	79.6832	29.8813	0.375002	1.85833	0.0875797	0.178602	0.00336089	0.0756296	0.00152931	0.409569	0.348117	5.62697	0.107571	0.054369	0.00265146	1064.5	31.1882	1058.97	18.3903	1078.09	39.9253	98.2261	99.4809	1069.56	50.8162
69	91500-2	2022-06-21 17:37:51	23.452	40.9654	82171.3	78.976	30.0384	0.380348	1.85473	0.087132	0.18004	0.00332238	0.0746587	0.00145125	0.465202	0.336458	5.56784	0.100069	0.0525812	0.00260871	1063.37	30.6908	1066.86	18.1656	1049.11	38.7245	101.692	100.329	1035.23	50.0132
70	91500-3	2022-06-21 17:38:33	24	6.6824	84940.1	82.0679	30.9282	0.376861	1.85518	0.0864068	0.178773	0.00332154	0.0750421	0.00138591	0.460638	0.372216	5.61962	0.104146	0.054298	0.00259218	1063.71	30.8347	1059.92	18.1504	1068.78	37.1006	99.1718	99.6442	1068.28	49.6405
71	91500-4	2022-06-21 17:39:16	24	34.2914	80757.6	79.2795	29.2542	0.369	1.79122	0.0845496	0.177629	0.0034382	0.0732075	0.00142957	0.500448	0.295551	5.66142	0.11154	0.0541243	0.00259447	1040.36	31.0636	1053.6	18.832	1008.67	40.4692	104.455	101.273	1064.93	49.743
72	91500-5	2022-06-21 17:39:58	24	-7.14086	83500.7	80.5282	30.2921	0.376168	1.88441	0.088258	0.180647	0.00344687	0.0757435	0.00149968	0.431162	0.382033	5.55356	0.104111	0.0539483	0.00264189	1073.88	31.1472	1070.11	18.8422	1077.41	39.3993	99.3226	99.6492	1061.48	50.579
73	91500-6	2022-06-21 17:50:09	24	-13.3608	81401.1	81.1435	30.1841	0.371984	1.85616	0.0875735	0.179148	0.00328911	0.0751414	0.00161435	0.311185	0.390127	5.6064	0.102636	0.0533255	0.00250477	1065.31	31.9583	1061.99	17.9571	1063.79	42.4196	99.8309	99.6884	1049.69	48.0552
74	91500-7	2022-06-21 17:50:52	23.729	24.7699	79446.5	78.2284	29.7809	0.380692	1.846	0.0873465	0.179641	0.00322291	0.0742014	0.00145856	0.475205	0.219916	5.57111	0.105538	0.0534429	0.00259969	1061.56	32.1273	1064.72	17.5886	1040.19	41.1164	102.358	100.298	1051.82	49.9169
75	91500-8	2022-06-21 18:00:04	22.804	-19.4281	83328.1	81.4479	30.2257	0.371105	1.87126	0.0878827	0.179841	0.00315883	0.0754962	0.00152581	0.309163	0.345485	5.57921	0.0981929	0.0530006	0.00255691	1069.25	31.275	1065.86	17.2532	1075.04	41.6268	99.1459	99.6824	1043.39	49.0914
76	91500-9	2022-06-21 18:00:47	23.267	15.5204	79317.7	79.276	29.7234	0.374936	1.8527	0.0867565	0.176765	0.00351827	0.076527	0.0015506	0.420673	0.421163	5.67983	0.111831	0.0534319	0.00262992	1064.28	31.7526	1048.84	19.2879	1097.45	40.9529	95.5706	98.5498	1051.59	50.4315
77	91500-10	2022-06-21 18:10:23	23.267	5.78036	81584.7	78.3119	29.8589	0.381282	1.8586	0.0876077	0.17975	0.00332113	0.0748049	0.00133795	0.629953	0.164843	5.5676	0.102593	0.0536372	0.00274637	1064.63	31.312	1065.28	18.1333	1058.98	35.3622	100.595	100.061	1055.36	52.6436
78	91500-11	2022-06-21 18:11:06	23.313	39.7941	84207.7	80.7965	30.1686	0.37339	1.82395	0.0857516	0.179803	0.00334359	0.0738124	0.00150902	0.406062	0.347412	5.57617	0.100894	0.0548019	0.00261269	1053.84	31.765	1065.56	18.2797	1024.37	41.6491	104.021	101.112	1077.94	50.0596
79	91500-12	2022-06-21 18:20:12	23.081	4.55677	85361	81.4672	29.9337	0.367432	1.83992	0.0856464	0.179888	0.00344878	0.0741385	0.00136462	0.431638	0.430062	5.57705	0.10683	0.0538518	0.00265727	1058.36	30.6968	1065.98	18.8756	1036.57	37.1594	102.837	100.72	1059.63	50.933
80	91500-13	2022-06-21 18:20:55	23.174	-43.3542	83795.5	81.2123	30.0497	0.370014	1.83306	0.0847612	0.17743	0.00317501	0.0751707	0.00147057	0.345191	0.396419	5.64816	0.10598	0.0540329	0.00264056	1057.55	29.2162	1052.65	17.3857	1067.15	40.718	98.6407	99.5367	1063.13	50.6201
81	91500-14	2022-06-21 18:30:00	23.313	-39.602	79524.7	79.2985	30.0878	0.379425	1.87588	0.0879462	0.179888	0.00337692	0.0755547	0.00152861	0.409373	0.349092	5.57406	0.0998354	0.0526412	0.00263928	1072.5	31.9603	1066.01	18.4298	1072.13	40.1535	99.4291	99.3952	1036.36	50.5755
82	91500-15	2022-06-21 18:30:43	23.22	1.8153	78809.9	79.2082	29.9083	0.377591	1.84261	0.0859044	0.179118	0.00326613	0.0741079	0.00137858	0.425442	0.341627	5.59653	0.0999142	0.0548699	0.00268526	1059.27	30.61	1061.85	17.8652	1039.63	38.5518	102.137	100.243	1079.15	51.4152
83	91500-16	2022-06-21 18:40:17	23.729	6.67804	78551.7	79.9379	30.0296	0.375661	1.88291	0.0895958	0.180412	0.00327372	0.0753367	0.00166743	0.258581	0.379667	5.56573	0.100796	0.053665	0.00271343	1072.94	31.3342	1068.91	17.8642	1062.43	45.301	100.61	99.6249	1055.93	51.9481
84	91500-17	2022-06-21 18:41:00	23.914	32.5019	78293.9	80.6176	29.9799	0.371878	1.84819	0.0860803	0.178788	0.00336744	0.0748172	0.00148055	0.386917	0.392639	5.62053	0.105697	0.0533123	0.00265627	1062.66	31.6828	1059.99	18.3984	1052.57	40.0954	100.705	99.7489	1049.23	50.9543
85	91500-18	2022-06-21 18:50:14	23.868	-36.1594	75911.4	79.8599	29.9655	0.375226	1.84109	0.0855442	0.176359	0.00329289	0.0757992	0.00149027	0.422663	0.415339	5.69799	0.109672	0.0533638	0.00275293	1058.76	30.6357	1046.71	18.0701	1078.94	39.6006	97.0125	98.8613	1050.08	52.7802
86	91500-19	2022-06-21 18:50:56	24	-33.2525	78159	80.2101	30.0446	0.374574	1.85154	0.0872499	0.180853	0.00345319	0.0743804	0.00153185	0.422776	0.355411	5.54889	0.107911	0.0534115	0.00269891	1063.7	31.9197	1071.24	18.8173	1039.42	41.6431	103.061	100.709	1051.07	51.7069
87	91500-20	2022-06-21 19:00:01	23.729	26.2423	77180.1	79.7784	29.9585	0.375522	1.85356	0.0862643	0.179517	0.00341535	0.0750243	0.0015463	0.342676	0.454921	5.58848	0.104235	0.0552315	0.0027706	1063.18	30.7837	1063.96	18.6713	1056.99	41.5413	100.659	100.073	1085.96	52.9774
88	91500-21	2022-06-21 19:00:43	23.775	-74.2793	77826.4	80.2365	30.0472	0.374483	1.84213	0.0850057	0.179498	0.00311229	0.0741571	0.00138446	0.3336	0.420264	5.58903	0.0953404	0.0536366	0.00262844	1059.34	30.3019	1063.99	16.9748	1040.82	36.5361	102.226	100.438	1055.51	50.4145
89	91500-22	2022-06-21 19:10:11	24	-26.7062	77431.5	80.7728	30.0501	0.372033	1.83308	0.0857242	0.177444	0.00342536	0.0751641	0.00147918	0.453083	0.375132	5.65557	0.105817	0.0536561	0.00254876	1055.72	30.8043	1052.6	18.7413	1066.81	38.9666	98.6678	99.7039	1055.99	48.8582
90	91500-23	2022-06-21 19:10:54	24	-34.9175	77358.1	78.6675	29.9468	0.380676	1.87474	0.0882527	0.181269	0.00344992	0.0750972	0.00156218	0.358069	0.380718	5.53396	0.101071	0.0534429	0.00266349	1070.32	31.3954	1073.51	18.8116	1058.38	42.1272	101.43	100.298	1051.73	51.0112
91	91500-24	2022-06-21 19:20:01	24	45.6306	80210.1	81.0804	29.9724	0.369663	1.83375	0.0852678	0.17845	0.00322078	0.0749611	0.00148424	0.345933	0.406135	5.60766	0.0965414	0.0540612	0.0025974	1059.02	30.0584	1058.2	17.6448	1056.35	40.0288	100.175	99.9225	1063.71	49.8282
92	91500-25	2022-06-21 19:20:43	24	18.5277	79569.3	80.5725	30.0472	0.372921	1.85972	0.0875703	0.178392	0.00342185	0.0760211	0.00148559	0.495582	0.284979	5.63516	0.107061	0.0525458	0.00259568	1066.55	31.6911	1057.79	18.6836	1085.15	38.8319	97.4789	99.1791	1034.56	49.7803
93	91500-26	2022-06-21 19:29:56	24	22.8075	77687.4	78.3409	29.8189	0.38063	1.87154	0.086028	0.180154	0.00334839	0.0749568	0.00130325	0.502318	0.389209	5.57688	0.104612	0.0547335	0.00272225	1069.87	30.5042	1067.47	18.2918	1063.32	35.9313	100.39	99.7753	1076.46	52.1648
94	91500-27	2022-06-21 19:30:39	24	19.3956	79575.4	80.7289	30.1462	0.373426	1.83766	0.0858835	0.17981	0.00317098	0.0738454	0.00142138	0.344002	0.337213	5.58151	0.0983168	0.0529651	0.00262323	1057.39	30.6204	1065.67	17.3135	1030.92	40.3264	103.37	100.782	1042.59	50.3763
95	91500-28	2022-06-21 19:40:16	23.544	-6.7558	78303.3	81.318	30.0373	0.369381	1.83543	0.0858529	0.177658	0.00319268	0.0751677	0.00143785	0.440516	0.301179	5.65024	0.0998357	0.0547476	0.0027259	1056.61	30.6707	1053.89	17.4431	1063.22	38.3959	99.1216	99.7421	1076.74	52.1765
96	91500-29	2022-06-21 19:40:59	23.729	-9.63565	76937.1	78.7595	29.9379	0.380118	1.86702	0.0881101	0.180154	0.00346115	0.0751413	0.00147765	0.456166	0.367269	5.5696	0.109031	0.0533307	0.00257388	1067.59	30.9772	1067.42	18.8624	1065.93	40.9264	100.139	99.9842	1049.71	49.3593
97	91500-30	2022-06-21 19:50:04	23.59	14.3531	76058.3	79.4573	29.9669	0.377145	1.83992	0.0860917	0.178755	0.00344174	0.0752071	0.00145128	0.488735	0.395765	5.62382	0.107672	0.0536282	0.00261854	1058.17	30.9551	1059.78	18.7942	1063.85	39.0799	99.6169	100.152	1055.37	50.2543
98	91500-31	2022-06-21 19:50:48	23.22	10.5412	77631.8	80.3965	30.0498	0.37377	1.85437	0.087681	0.17966	0.00321436	0.0750416	0.00154909	0.372728	0.292385	5.57898	0.105313	0.0535687	0.00260102	1063.07	31.1924	1064.84	17.5863	1057.66	41.4341	100.678	100.166	1054.25	49.938
99	91500-32	2022-06-21 19:59:46	23.452	-6.35263	77563.1	80.3852	30.0343	0.37363	1.84665	0.085956	0.17817	0.00336538	0.0754134	0.00147539	0.386093	0.435842	5.63964	0.104363	0.0536423	0.0026491	1060.72	30.6952	1056.61	18.3733	1068.84	39.9838	98.856	99.6118	1055.59	50.7858
100	91500-33	2022-06-21 20:00:29	23.544	35.9738	77871.5	79.8647	29.9725	0.375291	1.84623	0.0870114	0.180194	0.00353954	0.0745266	0.00147177	0.459123	0.3695	5.5575	0.103473	0.0544521	0.00262024	1060.26	30.6855	1067.6	19.3688	1044.77	40.3367	102.185	100.692	1071.21	50.2044
101	91500-34	2022-06-21 20:09:47	24	-11.3511	77238.6	79.6755	29.9072	0.375362	1.84294	0.0872149	0.17857	0.00336382	0.0746723	0.00160469	0.293728	0.410889	5.60661	0.0988972	0.0546738	0.00279914	1058.92	31.1119	1058.79	18.3978	1050.62	44.0506	100.778	99.9884	1075.19	53.5819
102	91500-35	2022-06-21 20:10:30	24	5.37978	78524.5	80.1699	30.1329	0.375863	1.8516	0.0866567	0.179953	0.00326021	0.074655	0.00154811	0.33993	0.365321	5.5619	0.101786	0.0535124	0.00267543	1062.29	31.234	1066.41	17.8341	1046.51	42.2481	101.902	100.388	1053.05	51.3438
103	91500-36	2022-06-21 20:17:17	24	-0.393096	77678.5	80.8165	29.9165	0.370178	1.80283	0.0847922	0.177079	0.00329847	0.0736367	0.00143948	0.34237	0.385558	5.67394	0.106473	0.0526664	0.00261999	1044.67	30.961	1050.65	18.0627	1029.98	40.2563	102.007	100.573	1036.85	50.2851
104	91500-37	2022-06-21 20:18:00	24	30.3466	78225.6	80.2565	30.1172	0.375262	1.87891	0.0891887	0.180541	0.00342001	0.0751972	0.00150329	0.482483	0.273191	5.56692	0.105433	0.0536977	0.00261543	1071.58	31.3309	1069.55	18.6619	1067.05	39.3026	100.234	99.8104	1056.7	50.1074
105	91500-38	2022-06-21 20:18:43	24	1.13748	77270.6	79.1614	29.9422	0.378242	1.87773	0.0873914	0.179659	0.00317385	0.0752483	0.00147488	0.354503	0.406887	5.5779	0.101681	0.0540769	0.00274089	1071.72	30.7932	1064.84	17.3312	1064.37	39.5625	100.044	99.3579	1063.81	52.5372
	Notes
	1 Concentration calibration standard: 91500 zircon (U=80 ppm, Th=30 ppm) (Wiedenbeck et al. 2004)
	2 Isotopic ratios corrected for downhole U/Pb fractionation, gas background and instrumental mass bias using Iolite v.4.5 and 91500 zircon as calibration standard
	3 Dates calculated using decay constants of Jaffey et al. (1971) and Iolite v. 4.5
	4 Correlation of 207Pb/235U and 206Pb/238U ratio uncertainties
	5 Correlation of 207Pb/206Pb and 206Pb/238U ratio uncertainties
	6 Uncertainties quoted are 2s 'internal' errors generated by Iolite plus additional systematic error (in quadrature) to ensure that the secondary reference materials yielded a single population within uncertainty of the 'true' value, expressed as 2s "propagated' error (Paton et al. 2010)
	7 % Concordance calculated as (206Pb-238U age/207Pb-235U age)*100
	8 % Concordance calculated as (206Pb-238U age/207Pb-206Pb age)*100
	Strikethrough analyses not included in date calculations

## Sheet: Whole rock compositions
Sample ID	Lab ID	Date Analyzed	SiO2_UnNorm_wtpct	TiO2_UnNorm_wtpct	Al2O3_UnNorm_wtpct	FeO*_UnNorm_wtpct	MnO_UnNorm_wtpct	MgO_UnNorm_wtpct	CaO_UnNorm_wtpct	Na2O_UnNorm_wtpct	K2O_UnNorm_wtpct	P2O5_UnNorm_wtpct	Sum_UnNorm_wtpct	LOI	SiO2_Norm_wtpct	TiO2_Norm_wtpct	Al2O3_Norm_wtpct	FeO*_Norm_wtpct	MnO_Norm_wtpct	MgO_Norm_wtpct	CaO_Norm_wtpct	Na2O_Norm_wtpct	K2O_Norm_wtpct	P2O5_Norm_wtpct	Total_Norm_wtpct	Ni_XRF_ppm	Cr_XRF_ppm	Sc_XRF_ppm	V_XRF_ppm	Ba_XRF_ppm	Rb_XRF_ppm	Sr_XRF_ppm	Zr_XRF_ppm	Y_XRF_ppm	Nb_XRF_ppm	Ga_XRF_ppm	Cu_XRF_ppm	Zn_XRF_ppm	Pb_XRF_ppm	La_XRF_ppm	Ce_XRF_ppm	Th_XRF_ppm	Nd_XRF_ppm	U_XRF_ppm	La_ICPMS_ppm	Ce_ICPMS_ppm	Pr_ICPMS_ppm	Nd_ICPMS_ppm	Sm_ICPMS_ppm
21IWH07	AGI 2462-10	2022-06-21 10:05:10	71.6502	0.259695	13.3173	5.40603	0.101192	1.92154	0.623567	3.73921	1.27579	0.0908435	98.3854	1.6146	72.8261	0.263957	13.5358	5.49475	0.102852	1.95308	0.6338	3.80057	1.29673	0.0923343	100	2.68383	12.8175	11.5179	22.7357	293.346	28.2679	55.8593	91.1505	18.8951	2.81585	11.4624	13.333	110.714	7.9003	14.5041	30.4271	4.30835	15.9001	2.17905	13.4044	31.4696	3.65862	15.1246	3.20743
21IWH18	AGI 2462-22	2022-06-21 23:10:33	72.405	0.278898	12.5818	4.75958	0.124773	1.85488	1.73359	2.92271	2.47685	0.067461	99.2055	0.79452	72.9848	0.281132	12.6825	4.7977	0.125772	1.86973	1.74747	2.94612	2.49669	0.0680013	100	3.38129	5.05364	13.38	11.5519	310.768	121.778	50.6754	133.362	31.7107	4.60685	14.0096	14.9151	98.7139	10.4177	23.7255	48.8445	7.39285	24.5864	2.79595	23.5959	49.9695	6.26426	25.4226	5.74458
Reference material
USGS	AGV-2	PV	59.14	1.051	17.03	6.10071	0.1004	1.8	5.15	4.204	2.898	0.483	97.9571		60.3734	1.07292	17.3852	6.22794	0.102494	1.83754	5.2574	4.29167	2.95844	0.493073	100	18.87	16.22	13.11	118.5	1134	67.79	659.5	232	19.14	14.12	20.42	51.51	86.7	13.14	38.21	69.43	6.174	30.49	1.885
AGV-2	USGS CRM-1	2022-06-21 00:16:15	59.53	1.0424	17.0536	6.067	0.0997	1.7875	5.247	4.2041	2.8952	0.4844	98.4109		60.4913	1.05923	17.329	6.16497	0.10131	1.81636	5.33173	4.27199	2.94195	0.492222	100	18.5813	15.2064	13.1446	124.45	1134.44	67.21	666.32	234.455	21.35	14.66	20.73	51.78	88.01	14.37	40.3067	74.12	6.22	30.56	1	39.9526	71.5585	8.45998	31.6023	5.75882
USGS	BCR-2	PV	54	2.265	13.48	12.3904	0.1966	3.599	7.114	3.12	1.774	0.3593	98.2983		54.9348	2.30421	13.7134	12.6049	0.200003	3.66131	7.23716	3.17401	1.80471	0.36552	100	12.57	15.85	33.53	417.6	683.9	46.02	337.4	186.5	36.07	12.44	22.07	19.66	129.5	10.59	25.08	53.12	5.828	28.26	1.683
BCR-2	USGS CRM-2	2022-06-21 01:21:41	53.8648	2.2549	13.4744	12.4466	0.1969	3.6256	7.1235	3.1215	1.7664	0.3564	98.231		54.8348	2.29551	13.7171	12.6707	0.200446	3.69089	7.25178	3.17771	1.79821	0.362818	100	11.1244	12.8307	33.9878	411.8	682.27	45.2	331.04	179.411	36.16	12.83	22.16	19.37	132.44	10.24	26.0858	51	5.47	29.72	2.12	25.7593	53.4754	6.8735	28.6933	6.64932
USGS	GSP-2	GeoRem	66.6	0.66	14.9	4.40907	0.041319	0.96	2.1	2.78	5.38	0.29	98.1204		67.8758	0.672643	15.1854	4.49353	0.0421106	0.97839	2.14023	2.83325	5.48306	0.295555	100	17	20	6.3	52	1340	245	240	550	28	27	22	43	120	42	180	410	105	200	2.4
GSP-2	USGS CRM-3	2022-06-21 02:27:07	66.552	0.6734	14.9826	4.4209	0.0412	0.9549	2.1249	2.7979	5.4351	0.2955	98.2784		67.7178	0.685196	15.2451	4.49834	0.0419217	0.971628	2.16212	2.84691	5.53031	0.300676	100	15.7406	19.7632	6.44345	56.49	1331.4	246.5	240.71	569.87	28.77	26.67	22.56	44.89	114.32	41.22	197.544	439.19	107.09	202.69	2.27
BVHO-2																																													15.7715	37.9386	5.36303	24.7687	6.01734
[truncated: 22 more columns]

## Sheet: Silicate compositions (EPMA)
Sample	Analysis ID	PHASE	GRAIN	POINT	NUMBER	TAKEOFF	KILOVOLT	CURRENT	BEAMSIZE (um)	LINE	Si WT%	Sr WT%	F WT%	Ca WT%	K WT%	Cl WT%	Fe WT%	Mn WT%	Cr WT%	Ba WT%	Ti WT%	Na WT%	Al WT%	Mg WT%	O WT%	TOTAL	SiO2 (wt%)	SrO (wt%)	F (wt%)	CaO (wt%)	K2O (wt%)	Cl (wt%)	FeO (wt%)	MnO (wt%)	Cr2O3 (wt%)	BaO (wt%)	TiO2 (wt%)	Na2O (wt%)	Al2O3 (wt%)	MgO (wt%)	O (wt%)	TOTAL (%)	Si AT%	Sr AT%	F AT%	Ca AT%	K AT%	Cl AT%	Fe AT%
21IWH05	21IWH05_bt1	Biotite	1	1	24	40	15	20	5	968	17.5355	0.05717	0.467829	0.010419	8.10238	0.002596	7.7482	0.977862	0.009994	0.018233	0.629522	0.132394	9.90559	9.60825	39.5679	94.7738	37.5147	0.067609	0.467829	0.014578	9.76007	0.002596	9.96804	1.26265	0.014606	0.020357	1.05008	0.178464	18.7164	15.9334	-0.19759	94.7738	14.6274	0.015286	0.576922	0.00609	4.85458	0.001716	3.25042
21IWH05	21IWH05_bt1	Biotite	1	2	24	40	15	20	5	969	17.3074	0.016237	0.408364	0.015939	7.78863	0.006148	7.66464	1.00338	0.018096	0.012439	0.637548	0.139096	9.84967	9.78487	39.3235	93.976	37.0267	0.019202	0.408364	0.022302	9.38213	0.006148	9.86054	1.29561	0.026449	0.013888	1.06347	0.187498	18.6108	16.2263	-0.17335	93.976	14.5394	0.004372	0.50716	0.009383	4.69968	0.004092	3.23816
21IWH05	21IWH05_bt1	Biotite	1	3	24	40	15	20	5	970	17.1869	0.002227	0.388057	0.018493	7.6629	0.008605	7.93654	0.992455	0.021995	0.045644	0.624225	0.141444	9.80969	9.62635	39.0994	93.5649	36.769	0.002633	0.388057	0.025876	9.23067	0.008605	10.2103	1.2815	0.032147	0.050961	1.04125	0.190663	18.5352	15.9634	-0.16534	93.5649	14.5267	0.000603	0.484892	0.010953	4.65213	0.005762	3.37356
21IWH05	21IWH05_ms1	Muscovite	1	1	25	40	15	20	5	971	20.8588	0.034268	-0.02587	0.078337	8.69352	0.006488	3.37447	0.048525	0.006996	0.10419	0.22597	0.270715	16.7615	0.935807	42.3577	93.7314	44.6244	0.040526	-0.02587	0.10961	10.4722	0.006488	4.34124	0.062658	0.010226	0.116329	0.376932	0.364917	31.6705	1.55185	0.00943	93.7314	17.0654	0.008987	-0.03129	0.044912	5.10875	0.004205	1.38843
21IWH05	21IWH05_ms1	Muscovite	1	2	25	40	15	20	5	972	21.0929	0.019001	-0.0396	0.090601	8.66786	0.006624	3.33116	0.062212	0.011158	0.124942	0.227445	0.237597	16.708	0.736805	42.4338	93.7105	45.1252	0.022471	-0.0396	0.126769	10.4413	0.006624	4.28553	0.080331	0.016309	0.139498	0.379392	0.320275	31.5695	1.22184	0.015183	93.7105	17.257	0.004983	-0.04789	0.051943	5.0937	0.004293	1.37062
21IWH05	21IWH05_ms1	Muscovite	1	3	25	40	15	20	5	973	35.8346	0.039898	0.049049	0.059269	2.56685	0.035796	1.328	0.020214	0.005327	0.059142	0.056039	0.100411	5.17151	0.327926	46.6397	92.2936	76.6629	0.047183	0.049049	0.082929	3.09201	0.035796	1.70847	0.026101	0.007785	0.066032	0.093476	0.135352	9.77147	0.5438	-0.02873	92.2936	28.3694	0.010125	0.057406	0.03288	1.45962	0.02245	0.528731
21IWH05	21IWH05_bt2	Biotite	2	1	26	40	15	20	5	974	17.2283	0.020157	0.345165	0.012093	8.21592	0.003408	7.5763	1.05658	0.02544	0.03733	0.697245	0.096886	10.1734	9.62881	39.5542	94.6712	36.8576	0.023838	0.345165	0.01692	9.89684	0.003408	9.74689	1.36429	0.037182	0.041679	1.16305	0.1306	19.2225	15.9675	-0.14612	94.6712	14.3923	0.005398	0.42628	0.007079	4.92985	0.002255	3.18298
21IWH05	21IWH05_bt2	Biotite	2	2	26	40	15	20	5	975	17.0623	0.036881	0.251135	0.022611	8.15618	-0.003	7.69242	1.01276	0.015468	0.029569	0.614672	0.078241	10.1719	9.65692	39.3716	94.1696	36.5024	0.043616	0.251135	0.031638	9.82488	-0.003	9.89627	1.30771	0.022608	0.033014	1.02531	0.105467	19.2196	16.0141	-0.10507	94.1696	14.3341	0.009932	0.311905	0.013311	4.92164	-0.002	3.25001
21IWH05	21IWH05_bt2	Biotite	2	3	26	40	15	20	5	976	17.1251	0.076493	0.216135	0.013384	8.27338	0.004774	7.66296	1.01684	0.014555	0.037139	0.550074	0.074538	10.2463	9.83685	39.617	94.7655	36.6367	0.090461	0.216135	0.018726	9.96606	0.004774	9.85838	1.31298	0.021274	0.041466	0.917555	0.100475	19.3601	16.3125	-0.09209	94.7655	14.2944	0.020466	0.26671	0.007828	4.96029	0.003157	3.21677
21IWH05	21IWH05_ms2	Muscovite	2	1	27	40	15	20	5	977	20.9739	0.023785	-0.05078	0.006037	9.03515	0.000688	3.63891	0.047921	-0.00241	0.147997	0.105939	0.290209	17.1042	0.718387	42.7045	94.7444	44.8708	0.028128	-0.05078	0.008447	10.8837	0.000688	4.68144	0.061878	-0.00353	0.165238	0.176712	0.391195	32.318	1.1913	0.021225	94.7444	17.0108	0.006183	-0.06089	0.003431	5.26346	0.000442	1.48425
21IWH05	21IWH05_ms2	Muscovite	2	2	27	40	15	20	5	978	20.9922	0.000246	-0.04083	0.007593	8.98161	0.002756	3.37747	0.057143	0.006311	0.068077	0.122314	0.293731	17.0792	0.716188	42.617	94.2811	44.9099	0.000291	-0.04083	0.010624	10.8192	0.002756	4.3451	0.073786	0.009225	0.076008	0.204027	0.395943	32.2709	1.18765	0.016571	94.2811	17.0695	6.4e-05	-0.04908	0.004326	5.24575	0.001775	1.38116
21IWH05	21IWH05_ms2	Muscovite	2	3	27	40	15	20	5	979	21.2161	0.024979	0.031669	0.004626	8.95102	-0.00675	3.42964	0.058773	0.003369	0.091078	0.20256	0.249778	16.9938	0.701128	42.8099	94.7617	45.3888	0.02954	0.031669	0.006473	10.7823	-0.00675	4.41223	0.075889	0.004924	0.101689	0.337881	0.336695	32.1094	1.16268	-0.01181	94.7617	17.1729	0.006481	0.037897	0.002624	5.20405	-0.00433	1.3961
21IWH05	21IWH05_ms3	Muscovite	3	1	28	40	15	20	5	980	20.7687	0.029735	0.055385	0.00052	8.94251	-0.00319	3.54488	0.08328	0.013791	0.119226	0.179882	0.287065	17.1473	0.689285	42.4618	94.3201	44.4317	0.035165	0.055385	0.000728	10.7721	-0.00319	4.56047	0.107534	0.020156	0.133116	0.300054	0.386958	32.3996	1.14304	-0.02259	94.3201	16.9159	0.007763	0.06669	0.000297	5.23162	-0.00206	1.45203
21IWH05	21IWH05_ms3	Muscovite	3	2	28	40	15	20	5	981	20.9792	0.067722	0.043575	0.032168	8.99653	0.001515	3.30224	0.076543	0.004312	0.119519	0.202381	0.272738	17.2157	0.723082	42.7534	94.7906	44.882	0.080089	0.043575	0.045009	10.8372	0.001515	4.24832	0.098835	0.006302	0.133443	0.337583	0.367644	32.5288	1.19909	-0.0187	94.7906	16.9826	0.017572	0.052147	0.018247	5.23096	0.000972	1.34435
21IWH05	21IWH05_ms3	Muscovite	3	3	28	40	15	20	5	982	20.6835	0.066391	-0.03178	0.002023	8.87842	0.004131	3.39328	0.069765	-0.00574	0.098309	0.197356	0.268372	17.0967	0.71517	42.3122	93.7481	44.2494	0.078514	-0.03178	0.002831	10.6949	0.004131	4.36545	0.090083	-0.00839	0.109762	0.329201	0.361759	32.3039	1.18597	0.012451	93.7481	16.9344	0.017424	-0.03846	0.001161	5.22123	0.00268	1.39719
21IWH05	21IWH05_bt3	Biotite	3	1	29	40	15	20	5	983	17.1987	0.044196	0.344808	0.018242	7.92913	0.002318	7.58153	1.16502	0.014675	0.029852	0.673186	0.131646	10.1764	9.74208	39.5695	94.6213	36.7942	0.052267	0.344808	0.025525	9.55137	0.002318	9.75362	1.50432	0.021449	0.03333	1.12291	0.177456	19.2281	16.1553	-0.14572	94.6213	14.3658	0.011833	0.425787	0.010678	4.75718	0.001534	3.18478
21IWH05	21IWH05_bt3	Biotite	3	2	29	40	15	20	5	984	17.2815	0.014057	0.312376	0.080549	7.36904	0.004642	7.81465	1.16525	-0.00024	0.01567	0.691058	0.136806	10.0719	9.62902	39.4864	94.0728	36.9714	0.016624	0.312376	0.112705	8.87669	0.004642	10.0535	1.50462	-0.00035	0.017496	1.15273	0.184412	19.0307	15.9678	-0.13259	94.0728	14.5069	0.003783	0.38766	0.047382	4.44317	0.003087	3.29906
21IWH05	21IWH05_bt3	Biotite	3	3	29	40	15	20	5	985	20.9719	0.062549	-0.00766	0.031614	8.90088	0.000137	3.60823	0.08737	0.003364	0.126038	0.226382	0.30269	17.1004	0.792962	42.8072	95.014	44.8663	0.073971	-0.00766	0.044234	10.7219	0.000137	4.64197	0.112815	0.004916	0.140721	0.377618	0.408019	32.3109	1.31497	0.003204	95.014	16.9614	0.016216	-0.00916	0.017917	5.17069	8.8e-05	1.4676
21IWH07	21IWH07_1_bt1	Biotite	1	1	30	40	15	20	5	986	15.6263	0.045462	0.309615	0.025233	7.39369	0.012616	18.418	0.156482	0.001759	0.162632	0.884323	0.028813	9.62199	4.92804	36.9474	94.5623	33.4303	0.053764	0.309615	0.035307	8.90639	0.012616	23.6946	0.202056	0.00257	0.181579	1.4751	0.038839	18.1806	8.17217	-0.13322	94.5623	13.9603	0.013019	0.408923	0.015797	4.74449	0.008929	8.275
21IWH07	21IWH07_1_bt1	Biotite	1	2	30	40	15	20	5	987	15.2222	0.032936	0.304343	0.004628	6.56343	0.015172	19.2799	0.152681	0.006811	0.199149	0.810123	0.036783	9.70738	5.19904	36.7682	94.3027	32.5657	0.038951	0.304343	0.006475	7.90626	0.015172	24.8036	0.197148	0.009955	0.22235	1.35133	0.049583	18.3419	8.62158	-0.13158	94.3027	13.6638	0.009477	0.403869	0.002911	4.23172	0.010789	8.70343
21IWH07	21IWH07_1_bt1	Biotite	1	3	30	40	15	20	5	988	47.39	-0.00288	-0.07076	0.005877	0.016399	-0.00115	0.314986	0.004619	0.006203	-0.01571	0.014256	0.004454	0.019171	0.000269	54.1504	101.836	101.384	-0.00341	-0.07076	0.008223	0.019755	-0.00115	0.405228	0.005964	0.009067	-0.01754	0.02378	0.006004	0.036223	0.000446	0.030064	101.836	33.2448	-0.00065	-0.07339	0.002889	0.008263	-0.00064	0.111127
21IWH07	21IWH07_1_bt2	Biotite	2	1	31	40	15	20	5	989	16.2776	0.022469	0.409871	0.005415	7.99437	0.018163	16.6985	0.158621	0.006298	0.18848	0.875238	0.037584	9.48227	5.1636	37.2976	94.636	34.8236	0.026571	0.409871	0.007577	9.62997	0.018163	21.4826	0.204817	0.009204	0.210437	1.45995	0.050662	17.9166	8.5628	-0.17669	94.636	14.3999	0.006371	0.536043	0.003357	5.07979	0.012729	7.42912
21IWH07	21IWH07_1_bt2	Biotite	2	2	31	40	15	20	5	990	15.5211	0.033121	0.388336	0.005465	7.67669	0.014922	16.8873	0.132964	0.004405	0.152258	0.84212	0.03825	9.4623	5.38604	36.5308	93.0762	33.2053	0.039169	0.388336	0.007646	9.24728	0.014922	21.7255	0.171689	0.006438	0.169996	1.4047	0.05156	17.8789	8.93167	-0.1669	93.0762	13.9869	0.009567	0.517354	0.003451	4.96894	0.010652	7.65332
21IWH07	21IWH07_1_bt2	Biotite	2	3	31	40	15	20	5	991	14.7627	0.008851	0.440826	0.010876	5.10742	0.011068	17.9803	0.155523	-0.00496	0.127696	0.677155	0.011293	9.40454	6.08851	35.7215	90.5033	31.5827	0.010468	0.440826	0.015217	6.15237	0.011068	23.1316	0.200817	-0.00724	0.142573	1.12953	0.015223	17.7697	10.0966	-0.18813	90.5033	13.6454	0.002622	0.602379	0.007044	3.39089	0.008104	8.35809
21IWH07	21IWH07_1_bt3	Biotite	3	1	32	40	15	20	5	992	15.8629	0.026917	0.252857	0.005627	8.03037	0.028066	16.86	0.148574	0.012432	0.201346	0.945727	0.07679	9.93719	5.15699	37.4059	94.9517	33.9364	0.031832	0.252857	0.007873	9.67333	0.028066	21.6904	0.191844	0.018171	0.224803	1.57753	0.103511	18.7761	8.55183	-0.11281	94.9517	14.0063	0.007618	0.330065	0.003482	5.09294	0.019631	7.4867
21IWH07	21IWH07_1_bt3	Biotite	3	2	32	40	15	20	5	993	15.8676	0.059379	0.381486	-0.00422	7.83388	0.005909	17.093	0.149214	0.005142	0.168352	0.951839	0.056636	9.89893	5.22304	37.3901	95.0803	33.9464	0.070222	0.381486	-0.00591	9.43663	0.005909	21.9901	0.192671	0.007515	0.187965	1.58772	0.076344	18.7039	8.66137	-0.16198	95.0803	13.9939	0.016786	0.49738	-0.00261	4.96244	0.004128	7.58116
21IWH07	21IWH07_1_bt3	Biotite	3	3	32	40	15	20	5	994	15.4313	0.047246	0.277439	0.004898	6.73602	0.023804	17.8114	0.13725	0.012579	0.139128	0.840264	0.029962	9.86009	5.4574	36.948	93.7568	33.0131	0.055874	0.277439	0.006854	8.11417	0.023804	22.9143	0.177222	0.018385	0.155336	1.40161	0.040388	18.6305	9.05	-0.12221	93.7568	13.8104	0.013554	0.367073	0.003072	4.3301	0.016877	8.01663
21IWH07	21IWH07_1_gt1	Garnet	1	1	33	40	15	20	0	995	17.1245	0	0	3.88857	0.006064	0	25.4337	2.14537	-0.00089	0	0.055147	0.01441	10.9908	0.983561	39.441	100.082	36.6354	0	0	5.4409	0.007304	0	32.7203	2.77018	-0.0013	0	0.091988	0.019424	20.7669	1.63104	0	100.082	14.8134	0	0	2.35716	0.003768	0	11.0646
21IWH07	21IWH07_1_gt1	Garnet	1	2	33	40	15	20	0	996	17.3786	0	0	3.87158	0.005756	0	25.853	2.1306	-0.02582	0	0.06326	0.014487	10.9164	1.01578	39.7885	101.012	37.1791	0	0	5.41713	0.006934	0	33.2598	2.75112	-0.03773	0	0.105521	0.019528	20.6263	1.68447	0	101.012	14.9034	0	0	2.3266	0.003546	0	11.1499
21IWH07	21IWH07_1_gt1	Garnet	1	3	33	40	15	20	0	997	16.9787	0	0	3.25313	0.222736	0	25.7459	1.91124	0.004908	0	0.041787	0.029252	11.1852	1.25685	39.4386	100.068	36.3236	0	0	4.55178	0.268306	0	33.122	2.46786	0.007173	0	0.069704	0.039431	21.1342	2.08424	0	100.068	14.6709	0	0	1.96976	0.138239	0	11.1879
21IWH07	21IWH07_1_gt1	Garnet	1	4	33	40	15	20	0	998	17.6069	0	0	3.72751	0.001787	0	25.9606	2.00857	0.007683	0	0.036263	0.01345	10.9314	1.0572	40.0233	101.375	37.6675	0	0	5.21554	0.002153	0	33.3983	2.59355	0.011229	0	0.060488	0.01813	20.6547	1.75316	0	101.375	15.0228	0	0	2.22869	0.001095	0	11.1397
21IWH07	21IWH07_1_gt1	Garnet	1	5	33	40	15	20	0	999	17.3433	0	0	3.9933	-0.00172	0	26.0323	1.78682	-0.00322	0	0.061749	0.018857	10.9833	1.06605	39.8501	101.131	37.1035	0	0	5.58744	-0.00207	0	33.4904	2.30721	-0.0047	0	0.103002	0.025418	20.7528	1.76783	-1e-05	101.131	14.8462	0	0	2.3954	-0.00106	0	11.2069
21IWH07	21IWH07_1_gt1	Garnet	1	6	33	40	15	20	0	1000	17.4018	0	0	3.66282	-0.00256	0	26.2536	1.63186	-0.00654	0	0.047433	0.024453	10.992	1.08999	39.8173	100.912	37.2287	0	0	5.12502	-0.00309	0	33.7751	2.10711	-0.00956	0	0.07912	0.032962	20.7692	1.80754	0	100.912	14.9175	0	0	2.20028	-0.00158	0	11.3182
21IWH07	21IWH07_1_gt1	Garnet	1	7	33	40	15	20	0	1001	17.1591	0	0	2.69446	0.002219	0	28.1151	1.55481	0.009796	0	0.026456	0.004396	10.9581	1.22459	39.7111	101.46	36.7095	0	0	3.7701	0.002673	0	36.17	2.00763	0.014318	0	0.04413	0.005926	20.7052	2.03073	0	101.46	14.724	0	0	1.62018	0.001368	0	12.1327
21IWH07	21IWH07_1_gt1	Garnet	1	8	33	40	15	20	0	1002	17.1347	0	0	1.66695	0.012048	0	28.5178	1.65523	-0.01446	0	0.008932	-0.00224	10.8048	1.38137	39.3613	100.527	36.6572	0	0	2.33241	0.014513	0	36.6881	2.1373	-0.02113	0	0.0149	-0.00302	20.4155	2.29072	0	100.527	14.844	0	0	1.01196	0.007497	0	12.4246
21IWH07	21IWH07_1_gt1	Garnet	1	9	33	40	15	20	0	1003	17.1184	0	0	1.16094	0.012037	0	28.8544	1.7542	-0.0022	0	0.022202	0.003882	10.8972	1.41402	39.3864	100.621	36.6224	0	0	1.62439	0.0145	0	37.121	2.26509	-0.00322	0	0.037034	0.005232	20.5901	2.34487	4e-06	100.621	14.8237	0	0	0.704474	0.007487	0	12.5659
21IWH07	21IWH07_1_gt1	Garnet	1	10	33	40	15	20	0	1004	17.0937	0	0	1.11231	-0.00312	0	28.8887	1.63237	-0.02444	0	0.000445	-0.00616	10.9227	1.52548	39.3778	100.52	36.5695	0	0	1.55635	-0.00375	0	37.1652	2.10777	-0.03573	0	0.000742	-0.00831	20.6383	2.52971	0	100.52	14.8037	0	0	0.675034	-0.00194	0	12.5821
21IWH07	21IWH07_1_gt1	Garnet	1	11	33	40	15	20	0	1005	17.0789	0	0	1.19755	0.002493	0	28.6555	1.52912	0.000948	0	-0.0005	0.007887	10.9413	1.49433	39.3112	100.219	36.5379	0	0	1.67562	0.003003	0	36.8652	1.97446	0.001386	0	-0.00084	0.010632	20.6733	2.47805	4e-06	100.219	14.8198	0	0	0.728177	0.001554	0	12.5048
21IWH07	21IWH07_1_gt1	Garnet	1	12	33	40	15	20	0	1006	17.0397	0	0	1.31803	0.004355	0	29.0646	1.47033	-0.01549	0	0.013721	0.005024	10.7843	1.41093	39.2215	100.317	36.4539	0	0	1.84418	0.005246	0	37.3915	1.89854	-0.02264	0	0.022888	0.006772	20.3767	2.33974	4e-06	100.317	14.8113	0	0	0.80282	0.002719	0	12.7054
21IWH07	21IWH07_1_gt1	Garnet	1	13	33	40	15	20	0	1007	16.8889	0	0	0.997825	0.006317	0	28.584	1.23694	0.006918	0	0.008478	0.014	10.7837	1.6848	38.9063	99.1181	36.1313	0	0	1.39616	0.00761	0	36.7732	1.59718	0.010111	0	0.014142	0.018872	20.3756	2.7939	0	99.1181	14.8027	0	0	0.612855	0.003977	0	12.5995
21IWH07	21IWH07_1_gt1	Garnet	1	14	33	40	15	20	0	1008	16.6658	0	0	0.82706	0.017017	0	29.1707	1.11254	-0.00777	0	-0.00439	-0.00341	10.6904	1.52964	38.5116	98.5093	35.6542	0	0	1.15722	0.020498	0	37.5281	1.43656	-0.01135	0	-0.00732	-0.00459	20.1994	2.5366	0	98.5093	14.7507	0	0	0.512962	0.010818	0	12.9844
21IWH07	21IWH07_1_gt1	Garnet	1	15	33	40	15	20	0	1009	16.7969	0	0	1.11536	0.005688	0	28.9445	0.802835	0.001193	0	0.007247	0.004623	10.8095	1.72916	38.8705	99.0875	35.9345	0	0	1.56061	0.006852	0	37.237	1.03665	0.001743	0	0.012088	0.006231	20.4243	2.86747	0	99.0875	14.7287	0	0	0.685347	0.003583	0	12.7641
21IWH07	21IWH07_1_gt1	Garnet	1	16	33	40	15	20	0	1010	16.7683	0	0	1.18567	0.012366	0	29.0888	0.649998	-0.00999	0	0.009949	0.001681	10.7273	1.67247	38.7495	98.856	35.8735	0	0	1.65899	0.014897	0	37.4226	0.839302	-0.0146	0	0.016596	0.002265	20.269	2.77346	0	98.856	14.7491	0	0	0.730802	0.007813	0	12.8674
21IWH07	21IWH07_1_gt1	Garnet	1	17	33	40	15	20	0	1011	16.4596	0	0	0.634644	0.137766	0	30.2372	0.834389	2.8e-05	0	0.016086	0.004258	10.6295	1.48886	38.3879	98.8303	35.2131	0	0	0.887995	0.165951	0	38.9001	1.07739	4.1e-05	0	0.026833	0.005739	20.0842	2.46898	0	98.8303	14.5891	0	0	0.394187	0.087708	0	13.4785
21IWH07	21IWH07_1_gt1	Garnet	1	18	34	40	15	20	0	1012	18.1031	0	0	0.666729	0.086957	0	29.5578	1.46552	0.002711	0	0.018284	0.008926	10.409	1.58277	40.122	102.024	38.729	0	0	0.932889	0.104748	0	38.026	1.89234	0.003962	0	0.030498	0.012032	19.6677	2.6247	0	102.024	15.4249	0	0	0.398089	0.053219	0	12.6657
21IWH07	21IWH07_1_gt1	Garnet	1	19	34	40	15	20	0	1013	17.1911	0	0	0.741706	0.016038	0	28.7954	1.00485	-0.01197	0	0.002997	-0.00392	10.8822	1.78661	39.2794	99.6845	36.778	0	0	1.0378	0.019319	0	37.0453	1.29751	-0.0175	0	0.005	-0.00528	20.5617	2.96273	8e-06	99.6845	14.9423	0	0	0.451758	0.010013	0	12.5871
21IWH07	21IWH07_2_gt1	Garnet	2	1	35	40	15	20	0	1014	17.3797	0	0	4.52354	-0.00479	0	22.8151	4.41362	0.004859	0	0.088464	0.024941	10.9566	0.885455	39.827	100.915	37.1814	0	0	6.32934	-0.00577	0	29.3515	5.69903	0.007102	0	0.147564	0.03362	20.7024	1.46835	-1e-05	100.915	14.8925	0	0	2.71623	-0.00295	0	9.83191
21IWH07	21IWH07_2_gt1	Garnet	2	2	35	40	15	20	0	1015	17.3681	0	0	4.39244	0.005883	0	22.9146	4.4904	0.00075	0	0.065768	0.015567	10.9651	0.911001	39.8186	100.948	37.1566	0	0	6.14591	0.007086	0	29.4795	5.79817	0.001096	0	0.109705	0.020984	20.7183	1.51071	4e-06	100.948	14.8839	0	0	2.63773	0.003621	0	9.87563
21IWH07	21IWH07_2_gt1	Garnet	2	3	35	40	15	20	0	1016	17.4449	0	0	4.2869	0.011745	0	23.1376	4.20039	0.001722	0	0.068421	0.011196	11.0279	0.898725	39.8931	100.983	37.3209	0	0	5.99824	0.014147	0	29.7664	5.4237	0.002517	0	0.11413	0.015092	20.8371	1.49036	0	100.983	14.9305	0	0	2.57106	0.00722	0	9.95896
21IWH07	21IWH07_2_gt1	Garnet	2	4	35	40	15	20	0	1017	17.2377	0	0	2.0651	0.002059	0	25.889	3.95121	0.018856	0	0.026245	0.008562	10.8882	1.22827	39.5552	100.87	36.8776	0	0	2.88949	0.00248	0	33.3061	5.10195	0.027559	0	0.043779	0.011542	20.5731	2.03685	0	100.87	14.8666	0	0	1.24806	0.001275	0	11.2289
21IWH07	21IWH07_2_gt1	Garnet	2	5	35	40	15	20	0	1018	17.2557	0	0	1.49837	0.004943	0	26.3596	3.6311	-0.00874	0	0.016823	0.021555	11.0468	1.39843	39.6303	100.855	36.9162	0	0	2.09652	0.005954	0	33.9116	4.68861	-0.01277	0	0.028062	0.029055	20.8727	2.31901	0	100.855	14.8584	0	0	0.904108	0.003057	0	11.4148
21IWH07	21IWH07_2_gt1	Garnet	2	6	35	40	15	20	0	1019	17.2692	0	0	1.41563	0.003802	0	26.8373	3.48933	-0.00707	0	0.014848	0.003776	10.8896	1.42779	39.5807	100.925	36.945	0	0	1.98075	0.00458	0	34.5262	4.50556	-0.01034	0	0.024767	0.005091	20.5756	2.3677	0	100.925	14.8849	0	0	0.85504	0.002354	0	11.6333
21IWH07	21IWH07_2_gt1	Garnet	2	7	35	40	15	20	0	1020	17.2704	0	0	1.06527	0.007935	0	27.2177	3.27284	-0.00244	0	0.019097	0.001386	10.8398	1.54134	39.5235	100.757	36.9475	0	0	1.49053	0.009559	0	35.0155	4.22601	-0.00357	0	0.031855	0.001869	20.4815	2.55601	4e-06	100.757	14.909	0	0	0.644423	0.00492	0	11.8165
21IWH07	21IWH07_2_gt1	Garnet	2	8	35	40	15	20	0	1021	12.8737	0	0	0.285888	0.1179	0	27.2254	1.55949	0.005096	0	3.95014	0.01395	9.03175	3.34272	35.9404	94.3465	27.5415	0	0	0.400014	0.142021	0	35.0254	2.01367	0.007448	0	6.58906	0.018805	17.0653	5.54323	4e-06	94.3465	12.1066	0	0	0.188397	0.079638	0	12.876
21IWH07	21IWH07_2_gt1	Garnet	2	9	35	40	15	20	0	1022	14.1383	0	0	0.068546	1.01463	0	22.3221	0.203488	-0.00067	0	0.016196	0.003514	11.7784	4.02114	35.9336	89.4992	30.2469	0	0	0.09591	1.22221	0	28.7173	0.262751	-0.00098	0	0.027016	0.004736	22.2551	6.66826	0	89.4992	13.3076	0	0	0.045211	0.685961	0	10.5664
21IWH07	21IWH07_2_gt1	Garnet	2	10	35	40	15	20	0	1023	17.1606	0	0	0.666572	0.010253	0	28.0318	2.46945	-0.0041	0	0.017267	0.011425	10.8513	1.5981	39.2882	100.101	36.7127	0	0	0.932668	0.012351	0	36.0628	3.18865	-0.00599	0	0.028803	0.015401	20.5034	2.65012	4e-06	100.101	14.9062	0	0	0.405735	0.006397	0	12.2454
21IWH07	21IWH07_2_gt1	Garnet	2	11	35	40	15	20	0	1024	17.2689	0	0	0.696996	0.034355	0	28.921	2.15857	-0.00067	0	0.015924	0.013661	10.9154	1.63164	39.6734	101.329	36.9444	0	0	0.975238	0.041384	0	37.2068	2.78723	-0.00098	0	0.026562	0.018415	20.6244	2.70575	8e-06	101.329	14.8428	0	0	0.419802	0.02121	0	12.5013
21IWH07	21IWH07_2_gt1	Garnet	2	12	35	40	15	20	0	1025	17.2213	0	0	0.534027	-0.0039	0	29.1824	1.92001	0.003273	0	0.00355	0.016175	10.9563	1.66859	39.6069	101.109	36.8426	0	0	0.747212	-0.00469	0	37.543	2.47919	0.004784	0	0.005922	0.021803	20.7018	2.76703	0	101.109	14.8291	0	0	0.322237	-0.00241	0	12.6375
21IWH07	21IWH07_2_gt1	Garnet	2	13	35	40	15	20	0	1026	17.2267	0	0	0.439843	0.014352	0	29.3068	2.25907	-0.00973	0	0.007757	0.000149	10.9621	1.37155	39.5143	101.093	36.854	0	0	0.615428	0.017288	0	37.7031	2.91699	-0.01423	0	0.01294	0.0002	20.7126	2.27443	0	101.093	14.8767	0	0	0.266174	0.008902	0	12.7281
21IWH07	21IWH07_2_gt1	Garnet	2	14	35	40	15	20	0	1027	17.3445	0	0	0.40058	0.009477	0	28.7707	1.85051	0.005492	0	0.003884	-0.00066	11.094	1.71717	39.7083	100.904	37.106	0	0	0.560492	0.011416	0	37.0135	2.38945	0.008026	0	0.006478	-0.00089	20.9618	2.84759	0	100.904	14.9153	0	0	0.241391	0.005854	0	12.4426
21IWH07	21IWH07_2_gt1	Garnet	2	15	35	40	15	20	0	1028	17.1693	0	0	0.404486	0.029502	0	29.0939	1.80836	0.000711	0	0.002931	0.009593	11.042	1.73335	39.5598	100.854	36.7313	0	0	0.565957	0.035538	0	37.4292	2.33502	0.001039	0	0.004889	0.012931	20.8636	2.87442	0	100.854	14.8033	0	0	0.244384	0.018271	0	12.6153
21IWH07	21IWH07_2_gt1	Garnet	2	16	35	40	15	20	0	1029	17.1639	0	0	0.336713	0.035105	0	28.879	1.54556	0.008126	0	0.002286	0.012067	10.8808	1.73946	39.2541	99.8571	36.7197	0	0	0.47113	0.042288	0	37.1528	1.99568	0.011876	0	0.003813	0.016266	20.5591	2.88455	0	99.8571	14.925	0	0	0.205173	0.021926	0	12.6291
21IWH07	21IWH07_2_gt1	Garnet	2	17	35	40	15	20	0	1030	11.8901	0	0	0.288561	1.2622	0	26.86	0.846584	-0.00217	0	0.014906	0.017797	10.3968	1.85157	32.3442	85.7705	25.4372	0	0	0.403755	1.52044	0	34.5554	1.09314	-0.00317	0	0.024864	0.02399	19.6445	3.07045	0	85.7705	12.295	0	0	0.209094	0.937477	0	13.9681
21IWH07	21IWH07_2_gt1	Garnet	2	18	35	40	15	20	0	1031	17.1516	0	0	0.538457	0.047103	0	28.9953	1.53916	0.018278	0	0.004101	0.001224	11.0824	1.8366	39.6	100.814	36.6934	0	0	0.753411	0.05674	0	37.3023	1.98742	0.026715	0	0.006841	0.001649	20.9401	3.04564	0	100.814	14.771	0	0	0.324953	0.029137	0	12.5581
21IWH07	21IWH07_2_gt1	Garnet	2	19	35	40	15	20	0	1032	17.1226	0	0	0.362654	0.004569	0	29.4808	1.58035	-0.01112	0	0.006248	0.00899	11.0701	1.75383	39.5643	100.943	36.6314	0	0	0.507427	0.005503	0	37.927	2.04061	-0.01625	0	0.010422	0.012118	20.9168	2.90837	8e-06	100.943	14.758	0	0	0.219034	0.002828	0	12.7787
21IWH07	21IWH07_2_gt1	Garnet	2	20	35	40	15	20	0	1033	17.1136	0	0	0.366602	0.008512	0	29.7305	1.55748	0.000726	0	0.000363	0.006862	11.0387	1.62417	39.5087	100.956	36.612	0	0	0.512951	0.010254	0	38.2481	2.01108	0.00106	0	0.000605	0.00925	20.8574	2.69337	-1e-05	100.956	14.7717	0	0	0.221742	0.005277	0	12.9057
21IWH07	21IWH07_2_gt1	Garnet	2	21	35	40	15	20	0	1034	17.2393	0	0	0.344259	0.00867	0	30.1146	1.60661	-0.01398	0	0.007447	-0.00112	11.0263	1.52208	39.6844	101.539	36.8811	0	0	0.481687	0.010444	0	38.7423	2.07452	-0.02043	0	0.012421	-0.00151	20.834	2.52407	4e-06	101.539	14.8173	0	0	0.207346	0.005353	0	13.0172
21IWH07	21IWH07_2_gt1	Garnet	2	22	35	40	15	20	0	1035	17.2075	0	0	0.27997	-0.00747	0	29.7659	1.45589	0.003027	0	0.008884	-0.0054	10.9654	1.78986	39.6049	101.068	36.813	0	0	0.391735	-0.009	0	38.2937	1.87989	0.004425	0	0.01482	-0.00728	20.719	2.96813	0	101.068	14.8192	0	0	0.168959	-0.00462	0	12.8919
21IWH07	21IWH07_2_gt1	Garnet	2	23	35	40	15	20	0	1036	17.1543	0	0	0.541182	0.011573	0	29.3038	1.41319	-0.01886	0	0.002984	0.008755	11.0601	1.76909	39.569	100.815	36.6992	0	0	0.757223	0.013941	0	37.6992	1.82477	-0.02757	0	0.004978	0.011802	20.8979	2.93368	4e-06	100.815	14.7858	0	0	0.326871	0.007165	0	12.7024
21IWH07	21IWH07_2_gt1	Garnet	2	24	35	40	15	20	0	1037	17.2647	0	0	0.424883	0.000872	0	29.8138	1.47831	0.0123	0	-0.00462	0.004813	10.9362	1.61268	39.606	101.15	36.9354	0	0	0.594497	0.00105	0	38.3554	1.90885	0.017978	0	-0.00771	0.006487	20.6638	2.67431	0	101.15	14.8715	0	0	0.256463	0.00054	0	12.9152
21IWH07	21IWH07_2_gt1	Garnet	2	25	35	40	15	20	0	1038	17.1368	0	0	0.649347	0.000345	0	29.6911	1.43794	0.003623	0	0.004947	0.00734	10.9642	1.61857	39.5349	101.049	36.6618	0	0	0.908568	0.000416	0	38.1975	1.85672	0.005295	0	0.008252	0.009894	20.7166	2.68408	0	101.049	14.7789	0	0	0.39242	0.000214	0	12.8774
21IWH07	21IWH07_2_gt1	Garnet	2	26	35	40	15	20	0	1039	17.1662	0	0	0.357798	0.156387	0	28.1046	1.68551	-0.00032	0	0.006966	0.006838	10.2508	1.82608	38.6029	98.1637	36.7247	0	0	0.500632	0.188382	0	36.1564	2.1764	-0.00047	0	0.01162	0.009218	19.3686	3.02818	4e-06	98.1637	15.1806	0	0	0.221725	0.099335	0	12.4992
21IWH07	21IWH07_2_gt1	Garnet	2	27	35	40	15	20	0	1040	24.6161	0	0	0.04968	5.15474	0	7.01442	0.057414	0.000534	0	0.045844	0.026903	11.5944	1.94853	42.7832	93.2918	52.6625	0	0	0.069512	6.20936	0	9.02403	0.074136	0.00078	0	0.07647	0.036265	21.9074	3.23125	4e-06	93.2918	20.2782	0	0	0.028678	3.05007	0	2.90599
21IWH07	21IWH07_2_bt1	Biotite	1	28	36	40	15	20	5	1041	16.0066	0.022027	0.330351	0.008738	7.84088	0.011256	17.577	0.15236	0.000271	0.196044	1.04382	0.072646	9.53252	5.15452	37.4053	95.3543	34.2439	0.026049	0.330351	0.012226	9.44507	0.011256	22.6127	0.196733	0.000396	0.218883	1.74116	0.097925	18.0115	8.54775	-0.14166	95.3543	14.1218	0.006229	0.430872	0.005402	4.96874	0.007867	7.79875
21IWH07	21IWH07_2_bt1	Biotite	1	29	36	40	15	20	5	1042	15.9455	0.036643	0.341174	0.001579	7.90499	0.01219	17.8627	0.140603	0.015104	0.171726	1.05147	0.048596	9.58273	5.02793	37.3843	95.5272	34.1132	0.043334	0.341174	0.00221	9.52229	0.01219	22.9803	0.181552	0.022076	0.191732	1.75391	0.065506	18.1064	8.33783	-0.14642	95.5272	14.0696	0.010364	0.445042	0.000976	5.00997	0.008521	7.92647
21IWH07	21IWH07_2_bt1	Biotite	1	30	36	40	15	20	5	1043	15.8812	0.061068	0.399567	0.000712	7.78149	0.012854	18.0548	0.144663	0.001771	0.197447	1.04816	0.031373	9.54687	5.08144	37.3133	95.5568	33.9756	0.072219	0.399567	0.000997	9.37353	0.012854	23.2274	0.186794	0.002588	0.220449	1.7484	0.04229	18.0386	8.42656	-0.17116	95.5568	14.0234	0.017285	0.521604	0.000441	4.93541	0.008992	8.01775
21IWH07	21IWH07_2_bt2	Biotite	2	31	37	40	15	20	5	1044	16.133	0.007935	0.343454	0.030087	7.97727	0.005228	16.5135	0.12616	-0.00434	0.192315	1.0983	0.076999	9.90885	5.11604	37.6113	95.1361	34.5142	0.009384	0.343454	0.042098	9.60937	0.005228	21.2445	0.162903	-0.00634	0.21472	1.83203	0.103793	18.7226	8.48393	-0.14581	95.1361	14.1777	0.002235	0.446214	0.018528	5.03544	0.00364	7.29828
21IWH07	21IWH07_2_bt2	Biotite	2	32	37	40	15	20	5	1045	15.953	0.023107	0.282637	0.049738	7.61558	0.017309	16.6533	0.129849	-0.00497	0.151887	1.08445	0.061363	9.92437	5.31728	37.5335	94.7923	34.1291	0.027326	0.282637	0.069593	9.17367	0.017309	21.4244	0.167665	-0.00726	0.169582	1.80892	0.082716	18.7519	8.81765	-0.12292	94.7923	14.0632	0.006529	0.368344	0.030725	4.8221	0.012088	7.38299
21IWH07	21IWH07_2_bt2	Biotite	2	33	37	40	15	20	5	1046	16.1966	0.038974	0.384608	0.043813	7.962	0.015837	16.1461	0.131485	0.010557	0.106101	1.01527	0.066251	9.61257	5.34084	37.3905	94.4615	34.6503	0.046091	0.384608	0.061303	9.59097	0.015837	20.772	0.169778	0.015429	0.118462	1.69353	0.089305	18.1628	8.85671	-0.16554	94.4615	14.3026	0.011032	0.5021	0.027112	5.05014	0.011079	7.17049
21IWH07	21IWH07_2_bt3	Biotite	3	1	38	40	15	20	5	1047	15.9426	0.025918	0.250089	0.000318	7.7649	0.016211	17.4601	0.152339	-0.00553	0.213105	1.05645	0.047858	9.87202	4.97922	37.499	95.2746	34.1069	0.030651	0.250089	0.000446	9.35354	0.016211	22.4624	0.196705	-0.00808	0.237931	1.76221	0.064511	18.653	8.25704	-0.10897	95.2746	14.0658	0.00733	0.326199	0.000197	4.92077	0.011331	7.74718
21IWH07	21IWH07_2_bt3	Biotite	3	2	38	40	15	20	5	1048	15.7498	0.046675	0.30905	0.00918	7.53462	0.008985	17.0986	0.140397	0.007643	0.175559	1.02298	0.028224	9.99614	5.13461	37.2945	94.5569	33.6944	0.055198	0.30905	0.012844	9.07615	0.008985	21.9973	0.181286	0.011171	0.196011	1.70638	0.038045	18.8875	8.51472	-0.13217	94.5569	13.963	0.013264	0.405056	0.005703	4.79795	0.00631	7.6235
21IWH07	21IWH07_2_bt3	Biotite	3	3	38	40	15	20	5	1049	15.7849	0.04223	0.314617	0.011194	7.40991	0.021457	17.3736	0.149784	-0.00847	0.140245	0.991104	0.051978	9.70134	5.17783	37.127	94.2887	33.7695	0.049941	0.314617	0.015663	8.92592	0.021457	22.3511	0.193407	-0.01238	0.156584	1.65322	0.070065	18.3305	8.58639	-0.13733	94.2887	14.0501	0.012049	0.414003	0.006982	4.73743	0.01513	7.77715
21IWH07	21IWH07_2_plg1	Plagioclase	1	1	39	40	15	20	5	1050	31.7104	-0.01521	0	1.17809	0.05281	0	-0.00164	-0.00081	0	-0.00923	0	8.15513	11.1009	0	49.3179	101.488	67.84	-0.01798	0	1.64839	0.063614	0	-0.00211	-0.00104	0	-0.0103	0	10.9929	20.9749	0	0	101.488	22.5448	-0.00347	0	0.58693	0.026968	0	-0.00059
21IWH07	21IWH07_2_plg1	Plagioclase	1	2	39	40	15	20	5	1051	32.0822	-0.00604	0	1.13057	0.078552	0	-0.00558	-0.01575	0	0.030547	0	8.30411	11.057	0	49.7414	102.397	68.6353	-0.00714	0	1.58189	0.094623	0	-0.00717	-0.02034	0	0.034105	0	11.1938	20.892	0	0	102.397	22.6101	-0.00136	0	0.558336	0.039764	0	-0.00198
21IWH07	21IWH07_2_plg1	Plagioclase	1	3	39	40	15	20	5	1052	31.9149	-0.01816	0	1.12511	0.071681	0	-0.00098	0.006909	0	-0.00611	0	8.22622	11.0351	0	49.5021	101.857	68.2774	-0.02147	0	1.57426	0.086346	0	-0.00127	0.008922	0	-0.00682	0	11.0888	20.8507	0	-1e-05	101.857	22.6055	-0.00412	0	0.558442	0.036468	0	-0.00035
21IWH07	21IWH07_2_plg1	Plagioclase	1	4	39	40	15	20	5	1053	31.9969	0.0229	0	1.08887	0.066083	0	-0.00361	-0.01483	0	0.00971	0	8.23854	10.9969	0	49.5524	101.954	68.4528	0.027082	0	1.52355	0.079603	0	-0.00464	-0.01915	0	0.010842	0	11.1054	20.7784	0	4e-06	101.954	22.6444	0.005195	0	0.539995	0.033592	0	-0.00128
21IWH07	21IWH07_2_plg1	Plagioclase	1	5	39	40	15	20	5	1054	31.7135	-0.02116	0	1.22128	0.068288	0	-0.01148	-0.00704	0	-0.02375	0	8.14021	11.1401	0	49.3642	101.584	67.8466	-0.02503	0	1.70882	0.082259	0	-0.01477	-0.00909	0	-0.02652	0	10.9728	21.0491	0	4e-06	101.584	22.5253	-0.00482	0	0.607861	0.034839	0	-0.0041
21IWH07	21IWH07_2_plg1	Plagioclase	1	6	39	40	15	20	5	1055	31.6926	-0.00551	0	1.24572	0.051011	0	0.01376	0.004158	0	0.001334	0	8.23804	11.084	0	49.3469	101.672	67.8017	-0.00651	0	1.74301	0.061448	0	0.017702	0.005369	0	0.001489	0	11.1047	20.9431	0	4e-06	101.672	22.5036	-0.00125	0	0.619834	0.026017	0	0.004914
21IWH07	21IWH07_2_plg1	Plagioclase	1	7	39	40	15	20	5	1056	31.748	-0.0145	0	1.24586	0.062701	0	-0.01083	-0.0236	0	-0.01175	0	8.095	11.1265	0	49.3822	101.6	67.9203	-0.01715	0	1.74321	0.07553	0	-0.01393	-0.03048	0	-0.01312	0	10.9119	21.0232	0	0	101.6	22.5488	-0.0033	0	0.620067	0.031987	0	-0.00387
21IWH07	21IWH07_2_plg1	Plagioclase	1	8	39	40	15	20	5	1057	31.6818	-0.00613	0	1.06343	0.073602	0	0.014016	-0.01236	0	0.004862	0	8.1915	11.0773	0	49.2399	101.328	67.7787	-0.00725	0	1.48795	0.088661	0	0.018032	-0.01597	0	0.005428	0	11.042	20.9303	0	8e-06	101.328	22.5571	-0.0014	0	0.530571	0.03764	0	0.005019
21IWH07	21IWH07_2_plg1	Plagioclase	1	9	39	40	15	20	5	1058	31.9689	0.013107	0	0.988992	0.09174	0	0.015273	-0.00705	0	-0.01123	0	8.13116	10.9829	0	49.4395	101.613	68.3929	0.0155	0	1.3838	0.11051	0	0.019649	-0.0091	0	-0.01253	0	10.9606	20.7519	0	4e-06	101.613	22.6916	0.002982	0	0.491917	0.046772	0	0.005452
21IWH07	21IWH07_2_plg1	Plagioclase	1	10	39	40	15	20	5	1059	31.6127	-0.00605	0	0.472502	0.063346	0	0.019893	-0.01166	0	-0.0157	0	8.41511	10.4118	0	48.4085	99.3704	67.6309	-0.00716	0	0.661125	0.076306	0	0.025592	-0.01506	0	-0.01753	0	11.3434	19.6728	0	8e-06	99.3704	22.8943	-0.00141	0	0.23979	0.032952	0	0.007245
21IWH07	21IWH07_2_plg1	Plagioclase	1	11	39	40	15	20	5	1060	31.2088	0.016754	0	1.34621	0.069431	0	0.00993	0.007233	0	0.003331	0	8.00003	11.1624	0	48.8306	100.655	66.7667	0.019813	0	1.88362	0.083636	0	0.012775	0.009339	0	0.003719	0	10.7839	21.0912	0	0	100.655	22.4	0.003854	0	0.677087	0.035794	0	0.003584
21IWH06	21IWH06_amp1	Hornblende	1	1	38	40	15	20	5	221	19.1756	-0.02542	0.016807	7.89665	1.12621	0.045257	21.1124	0.368876	0.01122	-0.02638	0.674478	1.12177	5.45236	2.54309	38.7317	98.2246	41.0234	-0.03007	0.016807	11.049	1.35662	0.045257	27.161	0.476306	0.016399	-0.02945	1.12507	1.51212	10.3021	4.21721	-0.01729	98.2246	16.7113	-0.0071	0.021653	4.82244	0.70497	0.031245	9.25314
21IWH06	21IWH06_amp1	Hornblende	1	2	38	40	15	20	5	222	18.8147	-0.02407	0.175151	7.9745	1.11509	0.041958	20.8318	0.354973	0.000155	0.012825	0.751338	1.03977	5.48519	2.59262	38.2833	97.4494	40.2514	-0.02847	0.175151	11.1579	1.34323	0.041958	26.8001	0.458355	0.000227	0.014319	1.25328	1.40159	10.3642	4.29934	-0.08322	97.4494	16.538	-0.00678	0.227604	4.91191	0.704022	0.029217	9.20876
21IWH06	21IWH06_amp1	Hornblende	1	3	38	40	15	20	5	223	18.9537	-0.02145	0.181077	7.87271	1.11709	0.046608	20.8756	0.356418	-0.01338	-0.00753	0.754567	0.918221	5.44441	2.63323	38.353	97.4642	40.5487	-0.02537	0.181077	11.0155	1.34563	0.046608	26.8563	0.460221	-0.01956	-0.00841	1.25866	1.23774	10.2871	4.36668	-0.08677	97.4642	16.6493	-0.00604	0.235152	4.84606	0.704823	0.032434	9.22211
21IWH06	21IWH06_amp1	Hornblende	1	4	38	40	15	20	5	224	18.8064	0.016781	0.144317	7.82443	1.06922	0.044376	20.9716	0.399814	-0.00942	0.006394	0.940878	1.0165	4.98646	2.58412	37.9417	96.7436	40.2336	0.019845	0.144317	10.948	1.28798	0.044376	26.98	0.516255	-0.01377	0.007139	1.56944	1.37022	9.42183	4.28525	-0.07079	96.7436	16.6974	0.004776	0.189427	4.86808	0.681871	0.031212	9.36409
21IWH06	21IWH06_amp2	Hornblende	2	1	39	40	15	20	5	225	18.8933	-0.00212	0.127375	7.73442	1.10489	0.044947	20.8427	0.36719	-0.01307	-0.01041	0.743986	1.09698	5.31935	2.59515	38.1654	97.0101	40.4196	-0.00251	0.127375	10.822	1.33095	0.044947	26.8141	0.474129	-0.0191	-0.01163	1.24101	1.4787	10.0508	4.30354	-0.06378	97.0101	16.6759	-0.0006	0.166206	4.78377	0.700472	0.031428	9.25176
21IWH06	21IWH06_amp2	Hornblende	2	2	39	40	15	20	5	226	18.9276	-0.02854	0.219126	7.9175	1.05236	0.053604	21.1088	0.423116	0.005191	0.003334	0.794892	1.10942	5.22487	2.53257	38.237	97.5808	40.4928	-0.03375	0.219126	11.0782	1.26767	0.053604	27.1564	0.546343	0.007587	0.003723	1.32593	1.49547	9.8723	4.19976	-0.10436	97.5808	16.6423	-0.00804	0.284837	4.87832	0.664625	0.037338	9.33411
21IWH06	21IWH06_amp2	Hornblende	2	3	39	40	15	20	5	227	18.8469	-0.04875	0.18284	7.9433	1.16347	0.046237	20.9911	0.387572	0.013302	0.003889	0.754991	1.11097	5.31237	2.52458	38.1976	97.4305	40.3204	-0.05765	0.18284	11.1143	1.40151	0.046237	27.005	0.500448	0.019442	0.004342	1.25937	1.49757	10.0376	4.18651	-0.08743	97.4305	16.5905	-0.01375	0.237941	4.89982	0.735639	0.032244	9.29273
21IWH06	21IWH06_amp3	Hornblende	3	1	42	40	15	20	5	234	19.152	0.000934	0.210024	7.96189	1.04933	0.056543	20.7733	0.398598	0.00754	0.003974	0.702779	0.913736	5.1577	2.59275	38.2664	97.2474	40.9729	0.001104	0.210024	11.1403	1.26402	0.056543	26.7247	0.514684	0.01102	0.004437	1.17228	1.2317	9.74537	4.29955	-0.10121	97.2474	16.8649	0.000264	0.273414	4.91301	0.663702	0.039444	9.19949
21IWH06	21IWH06_amp3	Hornblende	3	2	42	40	15	20	5	235	19.2182	-0.01291	0.222772	7.8835	0.991972	0.091502	20.7418	0.444515	0.005456	0.01923	1.01803	1.12156	4.884	2.64382	38.3614	97.6349	41.1146	-0.01527	0.222772	11.0306	1.19492	0.091502	26.6843	0.573974	0.007975	0.021471	1.69814	1.51184	9.22824	4.38424	-0.11445	97.6349	16.8636	-0.00363	0.288987	4.8475	0.625212	0.063607	9.15322
21IWH06	21IWH06_amp3	Hornblende	3	3	42	40	15	20	5	236	19.2094	-0.02271	0.14926	7.82607	1.04089	0.069923	20.6842	0.412249	-0.00493	0.00826	0.995143	1.16476	4.92102	2.63719	38.3688	97.4595	41.0958	-0.02686	0.14926	10.9503	1.25385	0.069923	26.6101	0.532312	-0.0072	0.009222	1.65996	1.57007	9.29818	4.37325	-0.07863	97.4595	16.8726	-0.00639	0.193818	4.81696	0.656692	0.048655	9.13682
21IWH18	21IWH18_g1	Garnet	1	1	55	40	15	20	0	335	17.2382	0	0	1.31267	0.027778	0	18.5084	12.2368	0.007054	0	0.008326	0.007802	10.6473	0.584051	38.9032	99.4815	36.8786	0	0	1.83669	0.033462	0	23.811	15.8006	0.01031	0	0.013888	0.010517	20.118	0.968532	4e-06	99.4815	15.1468	0	0	0.80825	0.017532	0	8.17875
21IWH18	21IWH18_g1	Garnet	1	2	55	40	15	20	0	336	17.263	0	0	1.05615	0.006271	0	20.7381	10.2536	-0.00712	0	0.006235	0.023355	10.7357	0.815565	39.1144	100.005	36.9318	0	0	1.47777	0.007554	0	26.6795	13.2398	-0.01041	0	0.0104	0.031482	20.2849	1.35245	4e-06	100.005	15.0789	0	0	0.646457	0.003934	0	9.10982
21IWH18	21IWH18_g1	Garnet	1	3	55	40	15	20	0	337	17.4677	0	0	1.09647	0.00928	0	21.8025	9.22175	-0.00863	0	-0.00334	-0.00157	10.7777	0.887729	39.4378	100.687	37.3696	0	0	1.53418	0.011178	0	28.0489	11.9075	-0.01261	0	-0.00557	-0.00211	20.3643	1.47212	0	100.687	15.1385	0	0	0.665896	0.005777	0	9.50262
21IWH18	21IWH18_g1	Garnet	1	4	55	40	15	20	0	338	17.4334	0	0	1.08753	0.000366	0	23.0967	7.71643	-0.01214	0	0.011573	0.005906	10.7328	1.03776	39.3955	100.506	37.2963	0	0	1.52167	0.000441	0	29.7138	9.96374	-0.01774	0	0.019304	0.007962	20.2793	1.72092	0	100.506	15.1215	0	0	0.661023	0.000228	0	10.0752
21IWH18	21IWH18_g1	Garnet	1	5	55	40	15	20	0	339	17.25	0	0	1.08593	0.007746	0	23.3492	7.36936	-0.01091	0	-0.01403	0.011048	10.7807	1.01359	39.1707	100.013	36.904	0	0	1.51944	0.009331	0	30.0387	9.5156	-0.01595	0	-0.02341	0.014892	20.37	1.68084	4e-06	100.013	15.0421	0	0	0.663565	0.004852	0	10.2396
21IWH18	21IWH18_g1	Garnet	1	6	55	40	15	20	0	340	17.398	0	0	1.09859	-0.00752	0	23.2482	7.28956	-0.01296	0	0.003025	0.011244	10.7994	1.02485	39.3235	100.176	37.2205	0	0	1.53715	-0.00906	0	29.9087	9.41255	-0.01894	0	0.005046	0.015156	20.4053	1.69951	0	100.176	15.1231	0	0	0.669176	-0.0047	0	10.163
21IWH18	21IWH18_g1	Garnet	1	7	55	40	15	20	0	341	17.234	0	0	1.09536	-0.00106	0	23.5655	7.23104	-0.00448	0	-0.00161	0.001399	10.8838	1.03529	39.2899	100.329	36.8696	0	0	1.53262	-0.00128	0	30.3169	9.33699	-0.00655	0	-0.00268	0.001886	20.5648	1.71683	0	100.329	14.9807	0	0	0.667212	-0.00066	0	10.3018
21IWH18	21IWH18_g1	Garnet	1	8	55	40	15	20	0	342	17.3608	0	0	1.58981	-0.00801	0	23.0401	6.81124	0.00027	0	-0.00919	0.001062	10.913	1.04609	39.3877	100.133	37.141	0	0	2.22447	-0.00965	0	29.641	8.79492	0.000394	0	-0.01534	0.001431	20.6199	1.73473	-1e-05	100.133	15.0645	0	0	0.966705	-0.00499	0	10.0545
21IWH18	21IWH18_g1	Garnet	1	9	55	40	15	20	0	343	17.4025	0	0	1.07346	0.00702	0	23.9276	6.90003	-0.00952	0	0.006283	-0.00528	10.8272	1.11164	39.4827	100.724	37.2302	0	0	1.50199	0.008457	0	30.7827	8.90958	-0.01392	0	0.010481	-0.00712	20.4577	1.84343	-1e-05	100.724	15.0574	0	0	0.650859	0.004363	0	10.4118
21IWH18	21IWH18_g1	Garnet	1	10	55	40	15	20	0	344	17.1524	0	0	1.06686	-0.00885	0	23.9513	6.64557	-0.00962	0	-0.01154	-0.00199	10.7926	1.15152	39.1093	99.8376	36.6951	0	0	1.49276	-0.01066	0	30.8133	8.581	-0.01406	0	-0.01925	-0.00268	20.3925	1.90957	0	99.8376	14.9752	0	0	0.652709	-0.00555	0	10.5164
21IWH18	21IWH18_g1	Garnet	1	11	55	40	15	20	0	345	17.3156	0	0	1.09277	-0.00195	0	23.7728	6.59734	0.000391	0	0.001704	-0.00625	10.834	1.1716	39.3038	100.082	37.0442	0	0	1.52901	-0.00235	0	30.5836	8.51873	0.000572	0	0.002843	-0.00842	20.4707	1.94286	0	100.082	15.0536	0	0	0.665726	-0.00122	0	10.3938
21IWH18	21IWH18_g1	Garnet	1	12	55	40	15	20	0	346	17.364	0	0	1.09489	-0.00532	0	24.2803	6.51069	0.00442	0	0.001572	0.003622	10.7899	1.17518	39.4476	100.667	37.1478	0	0	1.53197	-0.00641	0	31.2366	8.40684	0.006461	0	0.002622	0.004882	20.3874	1.94881	0	100.667	15.0326	0	0	0.664226	-0.00331	0	10.5713
21IWH18	21IWH18_g1	Garnet	1	13	55	40	15	20	0	347	17.4281	0	0	1.10144	-0.00422	0	24.0578	6.44064	-0.02052	0	-0.01938	0.004136	10.847	1.17154	39.4624	100.469	37.285	0	0	1.54114	-0.00509	0	30.9503	8.3164	-0.02999	0	-0.03232	0.005575	20.4952	1.94277	0	100.469	15.091	0	0	0.668328	-0.00263	0	10.4764
21IWH18	21IWH18_g1	Garnet	1	14	55	40	15	20	0	348	17.4662	0	0	1.0964	-0.00243	0	24.3696	6.41381	0.001583	0	0.000139	0.003577	10.74	1.18766	39.5241	100.801	37.3664	0	0	1.53409	-0.00293	0	31.3514	8.28176	0.002314	0	0.000232	0.004821	20.293	1.9695	-1e-05	100.801	15.0956	0	0	0.664024	-0.00151	0	10.5923
21IWH18	21IWH18_g1	Garnet	1	15	55	40	15	20	0	349	17.3748	0	0	1.0418	0.000927	0	24.0538	6.35543	-0.01374	0	0.002474	0.007172	10.8844	1.20296	39.4257	100.336	37.1709	0	0	1.45768	0.001117	0	30.9451	8.20637	-0.02008	0	0.004127	0.009668	20.5659	1.99487	0	100.336	15.0587	0	0	0.63272	0.000577	0	10.4843
21IWH18	21IWH18_g1	Garnet	1	16	55	40	15	20	0	350	17.2546	0	0	0.994737	-0.00038	0	24.2434	6.37862	-0.00983	0	-0.00904	0.008306	10.9602	1.16055	39.3647	100.346	36.9138	0	0	1.39184	-0.00046	0	31.189	8.23632	-0.01436	0	-0.01508	0.011197	20.709	1.92454	0	100.346	14.971	0	0	0.604805	-0.00024	0	10.5786
21IWH18	21IWH18_g1	Garnet	1	17	55	40	15	20	0	351	17.2253	0	0	0.984134	-0.0052	0	23.8723	6.79072	-0.00647	0	0.006665	0.015568	10.9452	0.983667	39.2246	100.036	36.8511	0	0	1.377	-0.00627	0	30.7116	8.76844	-0.00946	0	0.011117	0.020985	20.6807	1.63122	0	100.036	15.0057	0	0	0.600768	-0.00326	0	10.4586
21IWH18	21IWH18_g1	Garnet	1	18	55	40	15	20	0	352	17.2848	0	0	1.03438	-0.00933	0	24.3073	6.61825	0.009001	0	0.002862	0.000783	10.8041	0.979556	39.2573	100.289	36.9784	0	0	1.4473	-0.01124	0	31.2713	8.54573	0.013155	0	0.004774	0.001055	20.4142	1.6244	-1e-05	100.289	15.0423	0	0	0.630801	-0.00583	0	10.6384
21IWH18	21IWH18_g1	Garnet	1	19	55	40	15	20	0	353	17.418	0	0	1.05359	-0.00986	0	24.0931	6.31967	0.002034	0	-0.0028	0.003375	10.8736	1.16794	39.448	100.367	37.2634	0	0	1.47419	-0.01188	0	30.9957	8.16019	0.002973	0	-0.00466	0.004549	20.5454	1.93679	0	100.367	15.0917	0	0	0.639697	-0.00614	0	10.4984
21IWH18	21IWH18_g1	Garnet	1	20	55	40	15	20	0	354	17.4977	0	0	1.08189	-0.00613	0	24.0888	6.35911	0.010005	0	0.002931	-0.00211	10.9393	1.19426	39.6425	100.808	37.4339	0	0	1.51378	-0.00739	0	30.9901	8.21111	0.014623	0	0.00489	-0.00285	20.6696	1.98044	0	100.808	15.0874	0	0	0.653699	-0.0038	0	10.4457
21IWH18	21IWH18_g1	Garnet	1	21	55	40	15	20	0	355	17.3729	0	0	1.07839	-0.00685	0	24.1457	6.43301	-0.0028	0	0.006586	0.009664	10.8846	1.20567	39.4961	100.623	37.1669	0	0	1.50888	-0.00825	0	31.0633	8.30654	-0.0041	0	0.010985	0.013026	20.5662	1.99936	0	100.623	15.0255	0	0	0.653568	-0.00426	0	10.5023
21IWH18	21IWH18_g1	Garnet	1	22	55	40	15	20	0	356	17.4805	0	0	1.08238	-0.00102	0	24.1279	6.37497	0.032011	0	-0.01204	0.009327	10.9103	1.22126	39.636	100.862	37.397	0	0	1.51447	-0.00123	0	31.0405	8.2316	0.046787	0	-0.02008	0.012573	20.6147	2.02522	4e-06	100.862	15.0698	0	0	0.653874	-0.00063	0	10.4608
21IWH18	21IWH18_g1	Garnet	1	23	55	40	15	20	0	357	17.4725	0	0	1.12469	0.001854	0	24.0013	6.44201	-0.0226	0	-0.00532	0.011381	10.87	1.19822	39.5567	100.651	37.3798	0	0	1.57367	0.002234	0	30.8776	8.31816	-0.03303	0	-0.00887	0.015342	20.5387	1.98702	4e-06	100.651	15.0936	0	0	0.680822	0.001151	0	10.4271
21IWH18	21IWH18_g1	Garnet	1	24	55	40	15	20	0	358	17.4037	0	0	1.03059	-0.00518	0	24.0201	6.45664	0.008457	0	-0.00083	0.009827	10.7736	1.09316	39.3108	100.101	37.2327	0	0	1.44201	-0.00624	0	30.9017	8.33705	0.01236	0	-0.00138	0.013247	20.3565	1.81278	0	100.101	15.1334	0	0	0.627978	-0.00324	0	10.5041
21IWH18	21IWH18_g1	Garnet	1	25	55	40	15	20	0	359	17.3289	0	0	1.04681	-0.00152	0	24.2341	6.66862	-0.01118	0	-0.00161	0.007088	10.9605	1.03916	39.476	100.747	37.0727	0	0	1.4647	-0.00184	0	31.1771	8.61077	-0.01635	0	-0.00268	0.009554	20.7096	1.72324	0	100.747	14.995	0	0	0.634754	-0.00095	0	10.5461
21IWH18	21IWH18_g1	Garnet	1	26	55	40	15	20	0	360	17.2624	0	0	1.079	-0.00052	0	23.8658	6.86104	0.003243	0	0.000869	0.007731	10.6291	1.1256	39.1345	99.9688	36.9305	0	0	1.50974	-0.00063	0	30.7032	8.85924	0.004739	0	0.001449	0.010421	20.0835	1.86658	0	99.9688	15.0632	0	0	0.659778	-0.00033	0	10.4732
21IWH18	21IWH18_g1	Garnet	1	27	55	40	15	20	0	361	17.3118	0	0	1.22306	-0.00042	0	23.1753	7.58544	-0.01091	0	-0.00704	0.005302	10.5414	1.04331	39.1166	99.9839	37.0361	0	0	1.71131	-0.0005	0	29.815	9.7946	-0.01595	0	-0.01175	0.007147	19.9178	1.73013	8e-06	99.9839	15.1141	0	0	0.748255	-0.00026	0	10.1755
21IWH18	21IWH18_g1	Garnet	1	28	55	40	15	20	0	362	17.2982	0	0	1.06923	-0.00267	0	21.6994	9.53663	-0.00685	0	-0.01602	0.007211	10.6809	0.854099	39.1807	100.301	37.0071	0	0	1.49607	-0.00321	0	27.9162	12.3141	-0.01001	0	-0.02673	0.00972	20.1813	1.41635	0	100.301	15.0798	0	0	0.653173	-0.00167	0	9.5133
21IWH18	21IWH18_g2	Garnet	2	1	56	40	15	20	0	363	17.2122	0	0	1.09815	-0.00943	0	23.8412	6.57491	-0.00399	0	-0.00134	-0.00481	10.8001	1.15495	39.155	99.8169	36.8229	0	0	1.53653	-0.01136	0	30.6717	8.48976	-0.00584	0	-0.00224	-0.00648	20.4067	1.91526	4e-06	99.8169	15.016	0	0	0.671337	-0.00591	0	10.4601
21IWH18	21IWH18_g2	Garnet	2	2	56	40	15	20	0	364	17.2329	0	0	1.106	-0.00044	0	23.8845	6.53099	-0.01751	0	0.007961	0.012516	10.7494	1.15297	39.1428	99.8021	36.8673	0	0	1.54752	-0.00053	0	30.7273	8.43306	-0.02559	0	0.013279	0.016871	20.3109	1.91196	4e-06	99.8021	15.0374	0	0	0.676286	-0.00027	0	10.4814
21IWH18	21IWH18_g2	Garnet	2	3	56	40	15	20	0	365	17.1749	0	0	1.08674	-0.00569	0	23.8847	6.56442	-0.00372	0	0.000438	0.0185	10.7211	1.17924	39.0732	99.6937	36.7432	0	0	1.52057	-0.00686	0	30.7276	8.47622	-0.00544	0	0.00073	0.024937	20.2573	1.95554	4e-06	99.6937	15.0089	0	0	0.665493	-0.00357	0	10.497
21IWH18	21IWH18_g2	Garnet	2	4	56	40	15	20	0	366	17.1953	0	0	1.08231	-0.00312	0	24.1751	6.42386	0.001932	0	-0.00538	0.004346	10.7223	1.18612	39.1368	99.9194	36.7868	0	0	1.51438	-0.00376	0	31.1011	8.29473	0.002823	0	-0.00898	0.005859	20.2595	1.96694	0	99.9194	15.0009	0	0	0.661645	-0.00196	0	10.6064
21IWH18	21IWH18_g2	Garnet	2	5	56	40	15	20	0	367	17.2989	0	0	1.06519	-0.00238	0	23.732	6.55136	0.011514	0	-0.00735	0.007755	10.6811	1.19591	39.1326	99.6666	37.0086	0	0	1.49041	-0.00286	0	30.5311	8.45936	0.016829	0	-0.01227	0.010453	20.1818	1.98318	0	99.6666	15.1041	0	0	0.65172	-0.00149	0	10.4207
21IWH18	21IWH18_g2	Garnet	2	6	56	40	15	20	0	368	17.2232	0	0	1.03525	-0.00886	0	23.6797	6.69021	-0.01123	0	0.002513	0.009614	10.7347	1.15653	39.0769	99.5885	36.8465	0	0	1.44853	-0.01068	0	30.4639	8.63865	-0.01641	0	0.004192	0.01296	20.283	1.91788	0	99.5885	15.0574	0	0	0.634228	-0.00557	0	10.4113
21IWH18	21IWH18_g2	Garnet	2	7	56	40	15	20	0	369	17.1991	0	0	1.02603	-0.00212	0	23.8695	6.87547	0.003941	0	0.004608	0.019713	10.7383	1.11784	39.1451	99.9974	36.795	0	0	1.43562	-0.00255	0	30.708	8.87787	0.00576	0	0.007686	0.026572	20.2897	1.85372	0	99.9974	15.0016	0	0	0.627123	-0.00133	0	10.4705
21IWH18	21IWH18_g2	Garnet	2	8	56	40	15	20	0	370	17.2348	0	0	1.02423	3.9e-05	0	23.4598	7.37996	-0.00161	0	-0.00982	-0.00184	10.7369	1.05321	39.1516	100.027	36.8714	0	0	1.4331	4.7e-05	0	30.181	9.52928	-0.00235	0	-0.01638	-0.00248	20.2871	1.74654	0	100.027	15.0347	0	0	0.626103	2.4e-05	0	10.2921
21IWH18	21IWH18_g2	Garnet	2	9	56	40	15	20	0	371	17.2981	0	0	1.01865	0.000787	0	22.8115	7.81916	-0.00365	0	-0.00817	0.004349	10.715	0.997539	39.11	99.7633	37.0068	0	0	1.4253	0.000948	0	29.3469	10.0964	-0.00533	0	-0.01363	0.005862	20.2458	1.65422	0	99.7633	15.1155	0	0	0.623753	0.000494	0	10.0246
21IWH18	21IWH18_g2	Garnet	2	10	56	40	15	20	0	372	17.0267	0	0	1.02805	-0.00461	0	21.7396	9.34871	-0.0112	0	0.004115	-0.00085	10.7089	0.86952	38.8551	99.5641	36.4263	0	0	1.43845	-0.00555	0	27.9679	12.0714	-0.01637	0	0.006863	-0.00114	20.2343	1.44193	4e-06	99.5641	14.9608	0	0	0.632998	-0.00291	0	9.60651
21IWH18	21IWH18_g2_2	Garnet	3	1	57	40	15	20	0	373	17.3128	0	0	1.08189	-0.00732	0	23.7027	6.6341	0.006162	0	-0.00339	0.007273	10.7649	1.1681	39.226	99.8932	37.0383	0	0	1.51379	-0.00881	0	30.4934	8.56619	0.009006	0	-0.00565	0.009803	20.3401	1.93706	0	99.8932	15.081	0	0	0.660401	-0.00458	0	10.3836
21IWH18	21IWH18_g2_2	Garnet	3	2	57	40	15	20	0	374	17.3727	0	0	1.15844	-0.01102	0	23.8622	6.53283	0.01199	0	-0.00734	0.001205	10.7623	1.20185	39.358	100.243	37.1663	0	0	1.62089	-0.01327	0	30.6986	8.43544	0.017524	0	-0.01225	0.001625	20.3351	1.99303	0	100.243	15.0805	0	0	0.704665	-0.00687	0	10.4171
21IWH18	21IWH18_g2_2	Garnet	3	3	57	40	15	20	0	375	17.2657	0	0	1.06303	-0.00237	0	24.2122	6.50243	-0.00295	0	0.002038	0.007203	10.7072	1.20674	39.2469	100.208	36.9375	0	0	1.4874	-0.00285	0	31.149	8.39618	-0.00431	0	0.003399	0.009709	20.231	2.00114	8e-06	100.208	15.0201	0	0	0.648032	-0.00148	0	10.5928
21IWH18	21IWH18_g2_2	Garnet	3	4	57	40	15	20	0	376	17.2164	0	0	1.06382	-0.00687	0	24.1416	6.31356	0.003104	0	0.002603	0.007207	10.7445	1.2629	39.1882	99.937	36.832	0	0	1.48849	-0.00827	0	31.0581	8.1523	0.004537	0	0.004342	0.009715	20.3016	2.09427	0	99.937	15.0006	0	0	0.649525	-0.0043	0	10.5785
21IWH18	21IWH18_g2_2	Garnet	3	5	57	40	15	20	0	377	17.2127	0	0	1.11613	-0.00028	0	24.1334	6.13705	-0.00385	0	0.017349	0.005933	10.8195	1.22934	39.2033	99.8705	36.8241	0	0	1.56169	-0.00033	0	31.0475	7.92439	-0.00562	0	0.028939	0.007998	20.4432	2.03862	8e-06	99.8705	14.9958	0	0	0.681393	-0.00017	0	10.5738
21IWH18	21IWH18_g2_2	Garnet	3	6	57	40	15	20	0	378	17.3968	0	0	1.0765	-0.00603	0	23.9551	6.18032	0.002832	0	-0.0012	0.012157	10.7563	1.25899	39.3137	99.9453	37.2179	0	0	1.50625	-0.00726	0	30.8181	7.98026	0.00414	0	-0.002	0.016387	20.3238	2.08778	0	99.9453	15.1236	0	0	0.655789	-0.00376	0	10.4731
21IWH18	21IWH18_g2_2	Garnet	3	7	57	40	15	20	0	379	17.316	0	0	1.08386	-0.00629	0	24.2154	6.12926	0.007094	0	0.011504	0.004274	10.7962	1.29062	39.3483	100.196	37.0451	0	0	1.51654	-0.00758	0	31.153	7.91434	0.010368	0	0.019189	0.005761	20.3992	2.14024	-1e-05	100.196	15.0314	0	0	0.659306	-0.00392	0	10.5714
21IWH18	21IWH18_g2_2	Garnet	3	8	57	40	15	20	0	380	17.2014	0	0	1.05521	-0.00536	0	24.3147	6.18776	0.009676	0	-0.00697	0.010043	10.7553	1.27756	39.1978	99.997	36.8	0	0	1.47645	-0.00646	0	31.2807	7.98987	0.014142	0	-0.01162	0.013538	20.3219	2.11858	4e-06	99.997	14.9812	0	0	0.643994	-0.00335	0	10.6497
21IWH18	21IWH18_g2_2	Garnet	3	9	57	40	15	20	0	381	17.4287	0	0	1.06217	0.002323	0	24.1333	6.18167	-0.01304	0	-0.00854	0.015458	10.7838	1.25204	39.4063	100.244	37.2862	0	0	1.4862	0.002798	0	31.0474	7.98201	-0.01907	0	-0.01425	0.020837	20.3758	2.07625	0	100.244	15.1129	0	0	0.645418	0.001447	0	10.5242
21IWH18	21IWH18_g2_2	Garnet	3	10	57	40	15	20	0	382	17.2246	0	0	1.05869	-0.00037	0	23.9693	6.37864	-0.00774	0	-0.0085	-0.00104	10.801	1.20457	39.163	99.7821	36.8495	0	0	1.48132	-0.00044	0	30.8365	8.23634	-0.01132	0	-0.01418	-0.0014	20.4083	1.99753	0	99.7821	15.0234	0	0	0.647069	-0.00023	0	10.5139
21IWH18	21IWH18_g2_2	Garnet	3	11	57	40	15	20	0	383	17.2367	0	0	1.04252	-0.00053	0	23.8822	6.37107	-0.00482	0	0.002109	-0.00122	10.7207	1.19739	39.0753	99.5214	36.8754	0	0	1.4587	-0.00064	0	30.7244	8.22656	-0.00704	0	0.003518	-0.00164	20.2565	1.98563	0	99.5214	15.0714	0	0	0.638775	-0.00033	0	10.5019
21IWH18	21IWH18_g2_2	Garnet	3	12	57	40	15	20	0	384	17.1423	0	0	1.04788	0.002706	0	24.2394	6.6384	0.018043	0	0.000848	0.013144	10.792	1.16873	39.21	100.273	36.6735	0	0	1.4662	0.00326	0	31.1839	8.57175	0.026371	0	0.001415	0.017718	20.3912	1.9381	0	100.273	14.9192	0	0	0.639072	0.001692	0	10.6093
21IWH18	21IWH18_g2_2	Garnet	3	13	57	40	15	20	0	385	17.2342	0	0	1.03803	-0.00066	0	23.8973	6.9849	-0.00373	0	-0.00602	0.003633	10.7821	1.13836	39.2664	100.335	36.8701	0	0	1.45242	-0.0008	0	30.7438	9.01916	-0.00545	0	-0.01005	0.004897	20.3726	1.88775	0	100.335	14.9843	0	0	0.632439	-0.00041	0	10.4492
21IWH18	21IWH18_g2_2	Garnet	3	14	57	40	15	20	0	386	17.1893	0	0	1.00884	-0.00789	0	23.2049	7.55709	-0.00679	0	-0.00363	0.010975	10.832	1.05146	39.1602	99.9965	36.774	0	0	1.41157	-0.0095	0	29.8531	9.75799	-0.00993	0	-0.00606	0.014794	20.4669	1.74364	0	99.9965	14.9912	0	0	0.616542	-0.00494	0	10.1777
21IWH18	21IWH18_g2_2	Garnet	3	15	57	40	15	20	0	387	17.2699	0	0	0.975839	0.0038	0	22.4768	8.63861	-0.01622	0	-0.00611	0.014338	10.8351	0.949443	39.2785	100.42	36.9465	0	0	1.3654	0.004578	0	28.9163	11.1545	-0.0237	0	-0.01019	0.019327	20.4728	1.57446	0	100.42	15.0166	0	0	0.594594	0.002373	0	9.82889
21IWH18	21IWH18_g2_2	Garnet	3	16	57	40	15	20	0	388	17.1167	0	0	0.944507	0.010664	0	19.9333	11.3198	-0.01337	0	0.001674	0.004639	10.7621	0.676566	38.9035	99.6602	36.6188	0	0	1.32156	0.012846	0	25.6442	14.6166	-0.01954	0	0.002792	0.006254	20.3348	1.12195	4e-06	99.6602	15.0316	0	0	0.581234	0.006727	0	8.80345
21IWH18	21IWH18_plag1	Plagioclase	1	1	58	40	15	20	5	389	29.171	-0.02412	0	4.04572	0.146373	0	0.015525	0.015317	0	-0.01973	0	6.34728	12.7718	0	48.4524	100.922	62.4072	-0.02852	0	5.66078	0.176319	0	0.019972	0.019778	0	-0.02203	0	8.55599	24.1322	0	8e-06	100.922	21.1054	-0.00559	0	2.05116	0.076066	0	0.005649
21IWH18	21IWH18_plag1	Plagioclase	1	2	58	40	15	20	5	390	29.0492	0.021931	0	4.21388	0.076489	0	0.023157	-0.0048	0	0.021149	0	6.41215	12.9182	0	48.5288	101.26	62.1467	0.025936	0	5.89606	0.092138	0	0.029792	-0.0062	0	0.023613	0	8.64343	24.4087	0	8e-06	101.26	20.9675	0.005074	0	2.13136	0.039655	0	0.008406
21IWH18	21IWH18_plag1	Plagioclase	1	3	58	40	15	20	5	391	29.1373	-0.03072	0	4.2491	0.054582	0	0.010691	-0.00118	0	-0.0011	0	6.34492	12.9021	0	48.5863	101.252	62.3351	-0.03633	0	5.94534	0.065749	0	0.013754	-0.00152	0	-0.00122	0	8.5528	24.3783	0	0	101.252	21.02	-0.0071	0	2.14804	0.028283	0	0.003879
21IWH18	21IWH18_plag1	Plagioclase	1	4	58	40	15	20	5	392	29.7197	-0.00729	0	3.68251	0.049761	0	0.02201	-0.00824	0	0.032288	0	6.65015	12.5533	0	48.828	101.522	63.5811	-0.00862	0	5.15258	0.059942	0	0.028316	-0.01064	0	0.03605	0	8.96425	23.7192	0	0	101.522	21.3428	-0.00168	0	1.85316	0.025668	0	0.007949
21IWH18	21IWH18_plag1	Plagioclase	1	5	58	40	15	20	5	393	29.5922	-0.03797	0	3.12757	0.288134	0	0.054833	0.007052	0	0.005311	0	6.78704	12.6659	0	48.6628	101.153	63.3082	-0.04491	0	4.3761	0.347084	0	0.070543	0.009105	0	0.00593	0	9.14878	23.9319	0	8e-06	101.153	21.3035	-0.00876	0	1.57777	0.14899	0	0.019852
21IWH18	21IWH18_plag1	Plagioclase	1	6	58	40	15	20	5	394	30.4147	0.019867	0	1.89578	1.88648	0	0.080211	0.000234	0	0.056984	0	6.54616	12.0335	0	48.8108	101.745	65.0679	0.023495	0	2.65257	2.27244	0	0.103192	0.000302	0	0.063622	0	8.82408	22.7371	0	4e-06	101.745	21.8244	0.00457	0	0.953253	0.972302	0	0.028946
21IWH18	21IWH18_plag1	Plagioclase	1	7	58	40	15	20	5	395	30.2766	-0.03314	0	1.31746	1.13194	0	0.206083	0.007223	0	-0.00552	0	6.71495	11.9974	0	48.3159	99.9289	64.7724	-0.03919	0	1.84339	1.36353	0	0.265126	0.009326	0	-0.00616	0	9.0516	22.6689	0	0	99.9289	22.0013	-0.00772	0	0.670875	0.590821	0	0.075314
21IWH18	21IWH18_plag1	Plagioclase	1	8	58	40	15	20	5	396	29.9344	-0.02556	0	3.22431	0.158663	0	0.041037	0.001987	0	0.011963	0	6.97628	12.3663	0	48.8619	101.551	64.0405	-0.03023	0	4.51146	0.191125	0	0.052794	0.002566	0	0.013357	0	9.40386	23.3659	0	4e-06	101.551	21.46	-0.00587	0	1.61979	0.081701	0	0.014795
21IWH18	21IWH18_plag1	Plagioclase	1	9	58	40	15	20	5	397	29.0867	-0.01982	0	3.86886	0.267524	0	0.053126	0.006866	0	-0.00585	0	6.42486	12.8632	0	48.4296	100.975	62.227	-0.02344	0	5.41331	0.322258	0	0.068346	0.008865	0	-0.00653	0	8.66056	24.3047	0	4e-06	100.975	21.0372	-0.0046	0	1.96082	0.138979	0	0.019324
21IWH18	21IWH18_plag1	Plagioclase	1	10	58	40	15	20	5	398	29.948	-0.01991	0	2.94533	0.096144	0	0.012674	-0.00151	0	-0.01268	0	6.97264	12.08	0	48.4863	100.507	64.0696	-0.02355	0	4.12112	0.115814	0	0.016304	-0.00195	0	-0.01415	0	9.39896	22.825	0	0	100.507	21.6573	-0.00462	0	1.49256	0.04994	0	0.004609
21IWH18	21IWH18_plag1	Plagioclase	1	11	58	40	15	20	5	399	29.8564	0.004873	0	3.23926	0.159568	0	0.041154	0.002139	0	-0.0011	0	7.16966	12.3596	0	48.8445	101.676	63.8734	0.005763	0	4.53237	0.192214	0	0.052945	0.002763	0	-0.00123	0	9.66454	23.3533	0	0	101.676	21.3827	0.001119	0	1.62567	0.082085	0	0.014823
21IWH18	21IWH18_plag1	Plagioclase	1	12	58	40	15	20	5	400	30.7369	-0.00297	0	2.70824	0.14059	0	0.008209	-0.0043	0	0.024241	0	6.84842	11.6749	0	48.9013	101.035	65.7572	-0.00351	0	3.78937	0.169354	0	0.01056	-0.00556	0	0.027065	0	9.23152	22.0595	0	0	101.035	22.0969	-0.00068	0	1.36433	0.072597	0	0.002968
21IWH18	21IWH18_plag1	Plagioclase	1	13	58	40	15	20	5	401	28.3616	-0.00826	0	2.43376	1.90118	0	0.215705	0.002721	0	0.008684	0	5.80394	13.1409	0	47.4448	99.305	60.6756	-0.00977	0	3.40532	2.29015	0	0.277504	0.003514	0	0.009696	0	7.82358	24.8294	0	0	99.305	20.9165	-0.00195	0	1.25776	1.0071	0	0.080004
21IWH18	21IWH18_plag1	Plagioclase	1	14	58	40	15	20	5	402	30.1686	-0.0204	0	2.01073	1.17465	0	0.072221	-0.01034	0	0.009599	0	6.83255	11.8183	0	48.3206	100.377	64.5415	-0.02413	0	2.81342	1.41498	0	0.092912	-0.01335	0	0.010717	0	9.21012	22.3304	0	0	100.377	21.8744	-0.00474	0	1.02164	0.61176	0	0.026335
21IWH18	21IWH18_plag1	Plagioclase	1	15	58	40	15	20	5	403	29.1337	-0.00951	0	2.9859	0.829397	0	0.080106	0.002023	0	0.017376	0	6.41032	12.8181	0	48.2113	100.479	62.3273	-0.01125	0	4.17788	0.999086	0	0.103056	0.002612	0	0.0194	0	8.64097	24.2196	0	0	100.479	21.1625	-0.00221	0	1.51988	0.432739	0	0.029263
21IWH18	21IWH18_plag1	Plagioclase	1	16	58	40	15	20	5	404	29.6575	0.000583	0	3.75186	0.06988	0	-0.00379	0.017111	0	0.004496	0	6.61985	12.5519	0	48.7753	101.445	63.4479	0.00069	0	5.24961	0.084177	0	-0.00488	0.022094	0	0.00502	0	8.92341	23.7166	0	0	101.445	21.3185	0.000134	0	1.88987	0.03608	0	-0.00137
21IWH18	21IWH18_plag1	Plagioclase	1	17	58	40	15	20	5	405	30.3458	-0.0351	0	2.09285	0.920713	0	0.127603	-0.00536	0	0.005281	0	6.94093	11.7803	0	48.5214	100.694	64.9204	-0.04151	0	2.92832	1.10908	0	0.164161	-0.00693	0	0.005897	0	9.35622	22.2587	0	8e-06	100.694	21.9198	-0.00813	0	1.05935	0.477698	0	0.046354
21IWH18	21IWH18_plag1	Plagioclase	1	18	58	40	15	20	5	406	29.8647	-0.01488	0	2.29839	0.648962	0	0.227404	0.014357	0	-0.00844	0	6.91385	12.3118	0	48.4994	100.756	63.8912	-0.01759	0	3.21592	0.781736	0	0.292555	0.018538	0	-0.00942	0	9.31971	23.2628	0	0	100.756	21.5702	-0.00344	0	1.16328	0.336672	0	0.082601
21IWH18	21IWH18_plag2	Plagioclase	2	1	59	40	15	20	5	407	29.1822	-0.03558	0	4.2959	0.072364	0	-0.00032	0.003087	0	0.008583	0	6.31255	12.9184	0	48.6613	101.419	62.4311	-0.04207	0	6.01083	0.087169	0	-0.00041	0.003986	0	0.009583	0	8.50917	24.4091	0	8e-06	101.419	21.0225	-0.00822	0	2.16862	0.037444	0	-0.00011
21IWH18	21IWH18_plag2	Plagioclase	2	2	59	40	15	20	5	408	29.0686	-0.02738	0	4.18148	0.120049	0	0.020139	0.006726	0	-0.00876	0	6.33949	12.8604	0	48.4601	101.021	62.1882	-0.03238	0	5.85074	0.14461	0	0.025908	0.008685	0	-0.00978	0	8.54549	24.2994	0	-1e-05	101.021	21.0208	-0.00635	0	2.11893	0.062355	0	0.007324
21IWH18	21IWH18_plag2	Plagioclase	2	3	59	40	15	20	5	409	29.2652	-0.04095	0	4.12322	0.114541	0	0.020066	0.00866	0	0.016613	0	6.40363	12.8146	0	48.6424	101.368	62.6087	-0.04842	0	5.76922	0.137975	0	0.025815	0.011182	0	0.018548	0	8.63195	24.2129	0	4e-06	101.368	21.0861	-0.00946	0	2.08182	0.059278	0	0.007271
21IWH18	21IWH18_plag2	Plagioclase	2	4	59	40	15	20	5	410	29.1067	-0.01075	0	4.06722	0.114163	0	0.011533	-0.01764	0	0.013628	0	6.20479	12.869	0	48.4136	100.772	62.2697	-0.01271	0	5.69086	0.13752	0	0.014837	-0.02277	0	0.015216	0	8.36392	24.3158	0	0	100.772	21.0926	-0.0025	0	2.06537	0.059423	0	0.004203
21IWH18	21IWH18_plag2	Plagioclase	2	5	59	40	15	20	5	411	29.019	-0.03024	0	4.09965	0.131733	0	0.012853	0.015908	0	-0.01136	0	6.26537	12.7306	0	48.2319	100.465	62.0821	-0.03576	0	5.73624	0.158684	0	0.016536	0.020541	0	-0.01268	0	8.44558	24.0542	0	8e-06	100.465	21.0956	-0.00705	0	2.08842	0.068785	0	0.004699
21IWH18	21IWH18_plag2	Plagioclase	2	6	59	40	15	20	5	412	29.2315	0.006598	0	4.00437	0.130427	0	0.028717	-8e-05	0	-0.00116	0	6.23842	12.8353	0	48.5273	101.001	62.5366	0.007802	0	5.60292	0.157111	0	0.036945	-0.0001	0	-0.00129	0	8.40924	24.2521	0	4e-06	101.001	21.1344	0.001529	0	2.02878	0.067732	0	0.010442
21IWH18	21IWH18_plag2	Plagioclase	2	7	59	40	15	20	5	413	29.0911	-0.00631	0	4.00004	0.116631	0	0.024071	0.00637	0	0.07201	0	6.27391	12.8396	0	48.3856	100.803	62.2363	-0.00747	0	5.59686	0.140493	0	0.030968	0.008226	0	0.0804	0	8.45708	24.2602	0	0	100.803	21.085	-0.00147	0	2.03161	0.060718	0	0.008774
21IWH18	21IWH18_plag2	Plagioclase	2	8	59	40	15	20	5	414	28.9547	-0.02096	0	4.08457	0.097337	0	0.029145	0.019355	0	-0.00963	0	6.33135	12.8317	0	48.2661	100.584	61.9446	-0.02479	0	5.71513	0.117251	0	0.037495	0.024993	0	-0.01075	0	8.53451	24.2453	0	0	100.584	21.0245	-0.00488	0	2.07833	0.050766	0	0.010643
21IWH18	21IWH18_plag2	Plagioclase	2	9	59	40	15	20	5	415	29.1112	0.00631	0	4.04676	0.059295	0	0.012308	-0.00361	0	-0.02462	0	6.36426	12.7349	0	48.3386	100.645	62.2793	0.007462	0	5.66223	0.071426	0	0.015834	-0.00466	0	-0.02749	0	8.57888	24.0624	0	0	100.645	21.1143	0.001467	0	2.05677	0.030891	0	0.004489
21IWH18	21IWH18_bt1	Biotite	1	1	60	40	15	20	5	416	16.3385	-0.00558	0.385245	-0.00491	8.19995	0.089718	17.6134	0.410414	-0.00181	0.171156	1.02929	0.025367	8.86597	5.03252	37.1879	95.3371	34.9538	-0.00659	0.385245	-0.00687	9.8776	0.089718	22.6596	0.529942	-0.00265	0.191095	1.71692	0.034194	16.7521	8.34543	-0.18247	95.3371	14.4687	-0.00158	0.504356	-0.00304	5.2158	0.062941	7.84425
21IWH18	21IWH18_bt1	Biotite	1	2	60	40	15	20	5	417	16.2057	0.033895	0.207325	-0.00044	8.24497	0.103236	17.7591	0.416765	0.005358	0.099612	1.11995	0.034165	8.8969	4.99068	37.2288	95.346	34.6697	0.040085	0.207325	-0.00062	9.93183	0.103236	22.847	0.538142	0.007831	0.111217	1.86815	0.046054	16.8105	8.27606	-0.1106	95.346	14.3704	0.009635	0.271791	-0.00027	5.25148	0.072522	7.91977
21IWH18	21IWH18_bt1	Biotite	1	3	60	40	15	20	5	418	16.3275	0.006233	0.309334	-0.00582	8.21849	0.092874	17.1321	0.385714	0.002649	0.021144	1.17302	0.039447	8.92082	5.08798	37.2379	94.9494	34.9303	0.007372	0.309334	-0.00814	9.89993	0.092874	22.0404	0.498048	0.003871	0.023607	1.95667	0.053173	16.8557	8.43741	-0.15121	94.9494	14.4688	0.001771	0.405251	-0.00361	5.23114	0.065199	7.6351
21IWH18	21IWH18_bt1	Biotite	1	4	60	40	15	20	5	419	21.9796	-0.03218	0.132575	0.000132	7.18723	0.064176	12.9841	0.305975	-0.00775	0.035739	1.10533	0.025015	8.20853	3.78936	40.7896	96.5674	47.0222	-0.03806	0.132575	0.000185	8.65769	0.064176	16.7041	0.395087	-0.01133	0.039903	1.84375	0.03372	15.5099	6.28391	-0.07031	96.5674	18.4283	-0.00865	0.164327	7.7e-05	4.32831	0.042626	5.47481
21IWH18	21IWH18_bt2	Biotite	2	1	61	40	15	20	5	420	16.3222	-0.02749	0.311717	5.1e-05	7.91037	0.079528	17.6529	0.428297	0.003613	0.113785	1.15797	0.029117	8.85326	5.11405	37.2833	95.2325	34.919	-0.03252	0.311717	7.1e-05	9.52878	0.079528	22.7104	0.553033	0.005281	0.127041	1.93156	0.039248	16.7281	8.48063	-0.14921	95.2325	14.4538	-0.0078	0.408081	3.1e-05	5.03142	0.05579	7.86155
21IWH18	21IWH18_bt2	Biotite	2	2	61	40	15	20	5	421	16.2744	0.03191	0.343938	-0.01525	8.13013	0.095711	17.5794	0.435735	-0.00764	0.085602	1.17352	0.024649	8.91725	4.92785	37.1771	95.1743	34.8167	0.037737	0.343938	-0.02134	9.7935	0.095711	22.6159	0.562637	-0.01117	0.095575	1.9575	0.033226	16.849	8.17186	-0.16643	95.1743	14.4367	0.009074	0.451051	-0.00948	5.18026	0.067261	7.84256
21IWH18	21IWH18_bt2	Biotite	2	3	61	40	15	20	5	422	16.464	0.018309	0.251609	0.032623	7.82346	0.10808	17.1251	0.439407	0.007213	0.023728	1.19631	0.035143	8.83267	5.04025	37.2713	94.6692	35.2223	0.021653	0.251609	0.045646	9.42408	0.10808	22.0314	0.567378	0.010543	0.026492	1.99552	0.047371	16.6892	8.35826	-0.13034	94.6692	14.6212	0.005212	0.330337	0.020302	4.99043	0.076038	7.64844
21IWH18	21IWH18_bt3	Biotite	3	1	62	40	15	20	5	423	16.2899	0.017581	0.109367	0.011899	8.17366	0.088408	17.3189	0.371418	0.013516	0.068826	1.20237	0.033342	8.92514	4.97409	37.2866	94.885	34.85	0.020792	0.109367	0.016649	9.84593	0.088408	22.2807	0.479589	0.019754	0.076844	2.00562	0.044945	16.8639	8.24853	-0.06601	94.885	14.4718	0.005007	0.143638	0.007407	5.21566	0.06222	7.7377
21IWH18	21IWH18_bt3	Biotite	3	2	62	40	15	20	5	424	16.0915	0.00026	0.245401	-0.0126	7.89337	0.073719	17.8352	0.385991	-0.00725	0.083647	1.16215	0.036483	8.9288	5.05776	37.1131	94.8874	34.4254	0.000308	0.245401	-0.01763	9.5083	0.073719	22.9449	0.498406	-0.0106	0.093392	1.93854	0.049178	16.8708	8.38729	-0.11997	94.8874	14.3206	7.4e-05	0.322869	-0.00786	5.04569	0.051974	7.98241
21IWH18	21IWH18_bt3	Biotite	3	3	62	40	15	20	5	425	15.2295	0.005709	0.239266	0.000736	5.77441	0.064157	18.6024	0.462727	0.000273	0.035514	1.04065	0.013151	8.9239	5.77715	36.3284	92.4979	32.5813	0.006752	0.239266	0.00103	6.95582	0.064157	23.9319	0.59749	0.0004	0.039652	1.73586	0.017727	16.8616	9.58025	-0.11523	92.4979	13.8772	0.001668	0.322315	0.00047	3.77934	0.046312	8.52464
21IWH18	21IWH18_bt4	Biotite	4	1	63	40	15	20	5	426	16.0608	0.009128	0.308706	0.016234	8.12415	0.114165	17.4045	0.396676	-0.01007	0.035459	1.11771	0.046201	8.90509	4.90022	36.8244	94.2534	34.3599	0.010795	0.308706	0.022715	9.78629	0.114165	22.3908	0.512203	-0.01471	0.03959	1.86441	0.062278	16.826	8.12604	-0.15576	94.2534	14.3786	0.002619	0.408579	0.010185	5.22418	0.080969	7.83611
21IWH18	21IWH18_bt4	Biotite	4	2	63	40	15	20	5	427	16.2006	0.025931	0.218261	0.007969	8.09625	0.085664	17.552	0.370746	-0.00481	0.06258	1.14491	0.040901	8.83027	4.91524	37.0222	94.5687	34.6588	0.030666	0.218261	0.01115	9.75269	0.085664	22.5806	0.478722	-0.00703	0.06987	1.90978	0.055134	16.6846	8.15095	-0.11124	94.5687	14.4612	0.00742	0.288027	0.004985	5.19098	0.060577	7.87937
21IWH18	21IWH18_bt6	Biotite	6	1	64	40	15	20	5	428	16.2565	-0.00563	0.32795	0.020312	8.09043	0.070199	17.5627	0.378575	-0.00077	0.102194	1.12547	0.048588	9.0577	5.01533	37.3108	95.3603	34.7784	-0.00665	0.32795	0.028421	9.74568	0.070199	22.5943	0.488831	-0.00113	0.114099	1.87735	0.065496	17.1144	8.31692	-0.15393	95.3603	14.373	-0.00159	0.428657	0.012585	5.13786	0.049169	7.80908
21IWH18	21IWH18_bt6	Biotite	6	2	64	40	15	20	5	429	16.395	0.006753	0.421776	0.026301	8.11841	0.095233	17.4424	0.401955	-0.0001	0.039458	1.11613	0.033911	8.84902	5.06576	37.2354	95.2473	35.0747	0.007987	0.421776	0.0368	9.77938	0.095233	22.4396	0.519019	-0.00015	0.044055	1.86176	0.045712	16.7201	8.40055	-0.1991	95.2473	14.5019	0.001915	0.551541	0.016302	5.15793	0.066732	7.75907
21IWH18	21IWH18_bt6	Biotite	6	3	64	40	15	20	5	430	16.5844	0.033496	0.177453	-0.00066	8.27644	0.080288	17.5694	0.423847	-0.00463	0.112496	1.10859	0.023039	8.88491	4.9549	37.5832	95.8072	35.4799	0.039612	0.177453	-0.00092	9.96974	0.080288	22.603	0.547287	-0.00677	0.125601	1.8492	0.031056	16.7879	8.21671	-0.09284	95.8072	14.6036	0.009454	0.231008	-0.00041	5.23475	0.056008	7.78054
21IWH18	21IWH18_wm1	Muscovite	1	1	65	40	15	20	5	431	21.1893	0.020008	0.086114	-0.01318	9.18286	0.000278	3.30331	0.032405	-0.00379	0.139591	0.13821	0.183737	16.8635	0.614371	42.5138	94.2506	45.3315	0.023662	0.086114	-0.01844	11.0616	0.000278	4.2497	0.041843	-0.00554	0.155854	0.230542	0.247673	31.8633	1.01881	-0.03633	94.2506	17.2536	0.005222	0.103662	-0.00752	5.37072	0.000179	1.35271
21IWH18	21IWH18_wm1	Muscovite	1	2	65	40	15	20	5	432	21.0519	0.001427	0.015152	0.004495	9.16284	-0.00974	3.24386	0.02638	0.021335	0.190552	0.113019	0.174731	16.7821	0.631295	42.3066	93.716	45.0376	0.001687	0.015152	0.00629	11.0375	-0.00974	4.17322	0.034062	0.031182	0.212751	0.188522	0.235534	31.7095	1.04688	-0.00418	93.716	17.2431	0.000375	0.018348	0.00258	5.3907	-0.00632	1.33621
21IWH18	21IWH18_wm1	Muscovite	1	3	65	40	15	20	5	433	21.0336	0.021086	0.089257	-0.00933	9.2356	-0.00139	3.49224	0.013057	0.004188	0.283857	0.181816	0.121245	16.3786	0.736416	42.0734	93.6536	44.9983	0.024936	0.089257	-0.01306	11.1251	-0.00139	4.49276	0.01686	0.006121	0.316926	0.30328	0.163435	30.9471	1.2212	-0.03727	93.6536	17.293	0.005557	0.108487	-0.00538	5.45397	-0.00091	1.44395
21IWH18	21IWH18_wm2	Muscovite	2	1	66	40	15	20	5	434	20.8971	0.03217	0.030227	-0.00018	9.45183	-0.00897	3.40767	0.011618	-0.00026	0.258075	0.095206	0.177951	16.1657	0.835859	41.8027	93.1567	44.7065	0.038045	0.030227	-0.00025	11.3856	-0.00897	4.38395	0.015002	-0.00038	0.288141	0.15881	0.239873	30.5448	1.38611	-0.01071	93.1567	17.2772	0.008526	0.036946	-0.0001	5.61299	-0.00587	1.41689
21IWH18	21IWH18_wm2	Muscovite	2	2	66	40	15	20	5	435	20.9038	0.026719	0.050615	-0.00938	9.26497	0.004729	3.524	0.027396	0.001785	0.277694	0.160723	0.176981	16.1494	0.758103	41.7745	93.092	44.7207	0.031598	0.050615	-0.01312	11.1605	0.004729	4.53361	0.035374	0.002609	0.310045	0.268096	0.238566	30.5139	1.25716	-0.02239	93.092	17.3031	0.007089	0.061938	-0.00544	5.50849	0.003101	1.46698
21IWH18	21IWH18_wm2	Muscovite	2	3	66	40	15	20	5	436	20.775	0.032266	0.064968	0.005905	9.2481	-0.00362	3.54027	0.045892	0.006897	0.41772	0.164266	0.142629	15.98	0.926148	41.6065	92.9529	44.4452	0.038158	0.064968	0.008263	11.1402	-0.00362	4.55455	0.059258	0.010081	0.466384	0.274006	0.192261	30.1939	1.53583	-0.02654	92.9529	17.251	0.008588	0.079755	0.003436	5.5159	-0.00238	1.47843
21IWH18	21IWH18_wm3	Muscovite	3	1	67	40	15	20	5	437	20.6498	0.024978	0.001763	0.013326	9.19407	-0.00056	3.17288	0.033471	-0.01185	0.184953	0.114782	0.176996	16.6934	0.636729	41.7586	92.6433	44.1772	0.02954	0.001763	0.018646	11.0751	-0.00056	4.0819	0.043219	-0.01732	0.2065	0.191462	0.238587	31.5419	1.05589	-0.00062	92.6433	17.1204	0.006638	0.002161	0.007742	5.47517	-0.00037	1.32295
21IWH18	21IWH18_wm3	Muscovite	3	2	67	40	15	20	5	438	21.0846	-0.01187	0.010004	0.000666	9.20727	0.010012	3.1774	0.03167	-0.01634	0.209785	0.154831	0.202154	16.3326	0.785727	42.0533	93.2318	45.1076	-0.01404	0.010004	0.000932	11.091	0.010012	4.08771	0.040893	-0.02388	0.234225	0.258268	0.272499	30.8601	1.30297	-0.00646	93.2318	17.3634	-0.00313	0.012179	0.000384	5.44616	0.006532	1.31592
21IWH18	21IWH18_wm3	Muscovite	3	3	67	40	15	20	5	439	21.0465	0.031032	0.051203	0.007191	9.27352	-0.00527	3.45555	0.010671	-0.01438	0.497949	0.133271	0.146053	15.9893	0.890034	41.8574	93.37	45.026	0.036698	0.051203	0.010061	11.1708	-0.00527	4.44556	0.013779	-0.02102	0.555959	0.222304	0.196877	30.2114	1.47594	-0.02037	93.37	17.3887	0.008218	0.062541	0.004163	5.50331	-0.00345	1.43581
[truncated: 173 more columns]

## Sheet: TWQ compositions
Mineral compositions used for internally consistent thermobarometry in TWQ
21IWH07	SiO2	TiO2	Al2O3	FeO	MnO	MgO	CaO	Na2O	K2O
Garnet	35.8735	0	20.27	37.4226	0.839	2.77346	0.89	0	0
Biotite	34.514	1.832	18.7226	21.2445	0.163	8.48393	0.042	0.1038	9.61
Plagioclase	67.84	0	20.9479	0.02	0	0	1.88362	10.73	0.063614
Garnet	Gr	Py	Alm	Sps
	0.0264	0.1143	0.8396	0.0197
Biotite	xMg-	xFe-	F3M2	MgM1	FeM1	TiM2	AlM1	F3M1	-vM1	Al4-	-Si4	-xK-
	0.4225	0.5223	0.0552	0.1993	0.2464	0.1069	0.3921	0.0552	0	0.6603	0.3397	0.95151
Plagioclase	An	Ab	Or
	0.0881	0.9084	0.0035
21IWH18	SiO2	TiO2	Al2O3	FeO	MnO	MgO	CaO	Na2O	K2O
Garnet	37.2634	0	21.36	30.9957	1.93679	4.04	1.47419	0	0
Muscovite	44.9983	0.30328	30.9471	4.49276	0.01686	1.2212	0	0.163435	11.1251
Biotite	34.85	2.00562	16.8639	22.2807	0.479589	8.24853	0.016649	0.044945	9.84593
Plagioclase	64.0405	0	23.44	0.052794	0	0	2.92832	9.35622	1.10908
Garnet	Gr	Py	Alm	Sps
	0.0459	0.1751	0.7312	0.0477
Muscovite	xK-	xNa	xAl	xOH
	0.9782	0.0218	0.8049	1
Biotite	xMg-	xFe-	F3M2	MgM1	FeM1	TiM2	AlM1	F3M1	-vM1	Al4-	-Si4	-xK-
	0.4035	0.5381	0.0585	0.2272	0.303	0.1183	0.293	0.0585	0	0.633	0.367	0.98521
Plagioclase	An	Ab	Or
	0.1382	0.7994	0.0623

## Sheet: Monazite unknowns and reference
Sample	Analysis ID	Grain #	Domain	Date (Ma)	Uncertainty (Ma)	Monazite-xenotime temperature (°C)	Ca (ppm)	K (ppm)	Si (ppm)	Sr (ppm)	P (ppm)	Th (ppm)	U (ppm)	Y (ppm)	La (ppm)	Ce (ppm)	Pr (ppm)	Nd (ppm)	Sm (ppm)	Eu (ppm)	Gd (ppm)	Dy (ppm)	Er (ppm)	Yb (ppm)	S (ppm)	Pb (ppm)	Eu/Eu*	Th/U	Gd/Dy	XPos	YPos
21IWH-5	2022-04-13-21IWH5-m21-core	21	Core	1740	40	500	6109	62	7018	71	132316	71832	1136	6575	136175	252775	26780	92091	14515	605	7073	618	2633	80	44	6092	0.340737	63.2324	11.445	-2160	-38115
21IWH-5	2022-04-14-21IWH5-hiTh-mz20	20	High Y rim	1447	26.9	590	8412	93	2635	63	140052	45639	1515	19074	127700	253751	25322	94906	15388	2284	12537	5661	1373	409	1293	3397	0.340737	30.1248	2.21463	692	-35527
21IWH-5	2022-04-12-21IWH5-mz19-innercore-loY	19	Core	1743	12.9	491	3641	147	5241	9	132214	52095	979	12887	122696	256622	26396	102121	18661	1121	14005	4947	746	-67	-45	4499	0.135945	53.2125	2.83101	603	-33610
21IWH-5	2022-04-12-21IWH5-mz19-middledomain	19	Overgrowth	1474	7.1	627	9627	281	1819	24	136727	53795	1728	21038	124375	243788	23863	92541	15249	2366	13263	6086	1575	349	1367	4068	0.335166	31.1314	2.17926	608	-33622
21IWH-5	2022-04-12-21IWH5-mz19-outerrim	19	Overgrowth	1467	5.9	597	8875	284	1415	65	137624	43707	1861	19278	134046	252215	24514	90933	14635	2287	12243	5663	1432	300	1724	3396	0.358253	23.4858	2.16193	595	-33628
21IWH-5	2022-04-12-21IWH5-mz20-core-loTh	20	Overgrowth	1344	18.5	575	4425	42	914	38	138377	3779	857	19379	136502	261226	27327	110924	20896	3857	17627	6728	1303	189	2073	419	0.351194	4.40957	2.61995	627	-35558
21IWH-5	2022-04-12-21IWH5-mz22-core-loTh	22	Overgrowth	1469	15.3	513	5055	100	1865	30	136578	32755	848	14522	131950	252895	26334	106884	19719	3811	14960	5297	937	104	604	2416	0.420894	38.6262	2.82424	4765	-38029
21IWH-7	2022-04-12-21IWH7-mz4-core	4	Low Y core	1749	28.8	-	11996	412	1043	25	137798	15961	5381	2905	122148	256392	28701	126648	23361	4181	13739	1790	181	-114	-42	2885	0.461942	2.96618	7.67542	5158	9465
21IWH-7	2022-04-14-21IWH7-mz17-rim	17	High Y rim	1739	7.1	583	9226	89	630	6	142088	43691	8542	18107	104418	234822	26611	117724	22080	2621	21596	8201	1408	316	-72	6038	0.189497	5.11484	2.63334	-12679	-1221
21IWH-7	2022-04-12-21IWH7-mz25-core-loY	25	Low Y core	1765	4.6	-	8971	323	2128	267	138445	55659	4545	1099	119667	243287	26190	115686	20262	4056	10035	1043	281	14	75	5917	0.65879	12.2462	9.62128	15077	-6586
21IWH-7	2022-04-13-21IWH7-mz25-rim-hiY	25	High Y rim	1749	74.5	554	11517	588	2755	229	137514	70868	5807	15162	102970	213963	24130	107563	22565	3560	20509	6120	800	-230	57	7467	0.268099	12.2039	3.35114	15087	-6594
21IWH-7	2022-04-17--21IWH7-m8-loY-core	8	Low Y core	1656	128	-	9747	426	1769	116	136227	22822	6468	3772	125734	257923	27590	116600	20519	3980	11915	1888	293	-4	38	3554	0.541027	3.52845	6.31091	18807	-21624
21IWH-7	2022-04-17--21IWH7-m14-loY-core	14	Low Y core	1759	14.9	-	5244	328	897	123	136976	23074	5755	2576	122125	256762	28745	126955	24123	4515	14487	1843	251	0	-13	3598	0.465555	4.00938	7.86055	6457	-26494
21IWH-7	2022-04-13-21IWH7-mz16-rim-hiY	16	High Y rim	1731	6.9	503	4744	292	786	51	139779	13994	9605	14219	117251	251511	28337	125304	24343	4640	15891	4422	1097	281	-44	3932	0.434198	1.45695	3.59362	9657	5031
21IWH11	2022-04-11-21IWH11-1-mz18-rim	18	Rim	1417	251	231	5292	286	1047	1799	137287	1199	72	5344	103915	287644	35350	130560	22491	5790	10686	1149	2355	-84	3799	93	0.838237	16.6528	9.30026	-8874	1818
21IWH11	2022-04-11-21IWH11-1-mz18-core-highTh	18	High Y core	1749	9	623	5772	90	3529	-12	136313	50808	2491	21798	113758	240234	29479	106905	21737	922	15409	5525	3670	396	122	4856	0.0941595	20.3966	2.78896	-8873	1804
21IWH11	2022-04-11-21IWH11-1-m11-core-upleft-hiY	11	High Y core	1732	7.1	604	5598	65	921	-4	139344	24268	10054	20359	117349	248656	30304	111518	22624	2003	16463	6076	2886	-50	99	4889	0.18767	2.41377	2.70951	15573	5446
21IWH11	2022-04-11-21IWH11-1-m11-core-upright-loY	11	High Y core	1743	9.1	526	5264	77	2014	-32	136840	30918	8013	15134	121132	249552	30235	111892	22279	1416	16257	4659	2867	-253	73	4861	0.135389	3.85848	3.48938	15587	5449
21IWH11	2022-04-11-21IWH11-1-m14-core	14	High Y core	1733	5.4	639	5702	79	460	20	140908	28760	3986	23337	128655	253898	29398	103768	18953	874	12768	5586	3861	388	82	3478	0.115361	7.21525	2.28571	-3862	4923
21IWH11	2022-04-11-21IWH11-1-m24-core	24	High Y core	1749	5.6	672	3926	97	1585	66	137805	22165	5646	26618	116302	247170	30476	114186	22867	1690	17625	7130	3767	309	125	3470	0.147116	3.92579	2.47195	1748	-3000
21IWH11	2022-04-11-21IWH11-1-m18-core-bot-hiY	18	High Y core	1697	25.6	737	7477	131	688	69	140276	29125	11900	32816	111990	234163	28570	103651	22703	1871	17004	8287	4343	701	299	5696	0.169429	2.44748	2.05189	-8869	1787
21IWH11	2022-04-11-21IWH11-2-mz8-core-loY	8	Low Y core	1707	8.3	-	1080	77	1919	-3	139975	11701	362	2765	182878	306168	28693	82198	9120	337	2800	-258	2358	-82	198	1029	0.292403	32.3232	-10.8527	2029	-36917
21IWH11	2022-04-17--21IWH11-1-m2-mY-core	2	High Y core	1736	7.1	498	4431	121	1455	70	137137	25740	4379	13791	137324	273354	26901	99622	13833	1688	9426	3735	1118	444	52	3357	0.35326	5.87805	2.52369	-9867	10102
21IWH11	2022-04-18-21IWH11-2-m5-core	5	High Y core	1717	3.3	595	3633	101	682	-13	142110	14639	6863	20278	136504	258384	27751	111036	17949	2527	13000	6812	1428	368	-55	3152	0.336627	2.13303	1.9084	13943	762
21IWH11	2022-04-18-21IWH11-2-m9-core	9	Low Y core	1706	80.8	-	6548	165	841	2516	139502	7811	2251	4070	116268	271287	31775	137504	26008	4417	12831	2127	179	-257	4197	1265	0.495246	3.47001	6.03244	4118	-6934
21IWH11	2022-04-12-21IWH11-2-mz8-rim	8	Rim	1326	184	277	5501	440	631	2212	138568	642	53	4018	139589	303009	31723	103273	15153	3422	6787	431	2082	-9	4340	55	0.9503	12.1132	15.7471	2035	-36936
21IWH11	2022-04-11-21IWH11-1-mz14-rim	14	Rim	1490	200	222	6125	173	488	2267	136543	848	2	5197	137076	294518	31763	106059	16421	3825	8296	1014	2293	-103	4566	49	0.834777	424	8.18146	-3843	4923
21IWH11	2022-04-12-21IWH11-1-mz28-rim	28	Rim	-	-	230	5257	353	566	1865	141161	894	129	5445	157109	303761	30378	96644	13411	2943	6412	983	2385	27	4005	32	0.919547	6.93023	6.52289	7988	-8156
21IWH11	2022-04-12-21IWH11-1-mz30-rim	30	Rim	-	-	302	4479	320	828	1451	137876	487	134	7131	139432	298788	32140	108056	16402	4186	9844	1689	2385	25	2835	12	0.770348	3.63433	5.8283	13979	-8877
21IWH18	2022-04-15-21IWH18-m12-loY-mantleft	12	Low Y mantle	1650	41.2	-	2250	8	12491	-16	136788	21771	1215	7898	114068	254080	29668	129853	26845	2132	19491	4715	404	-220	-58	1998	0.154892	17.9185	4.13383	556	-30697
21IWH18	2022-04-15-21IWH18-m4-core-hiY	4	High Y core	1755	12.2	715	6286	104	1808	-74	136418	32087	3849	30619	107623	236737	26734	116857	24265	2250	20743	9413	2551	802	-22	3755	0.161558	8.33645	2.20365	12472	-20232
21IWH18	2022-04-15-21IWH18-m18-mY	18	Medium Y rim	1571	36	537	4361	201	4488	50	135968	31299	2733	16022	117954	249534	28013	119867	23474	2258	19070	6638	1030	161	6	2959	0.179303	11.4523	2.87285	-2913	-36949
21IWH18	2022-04-15-21IWH18-m17-core	17	High Y core	1736	18.8	708	7378	156	1163	47	138404	32302	8287	29192	103834	229298	25970	115106	23916	2234	22057	9573	1733	217	67	5031	0.15195	3.89791	2.30408	-440	-34595
21IWH18	2022-04-14-21IWH18-mz12-core	12	Medium Y core	1683	21.8	578	6535	99	1979	-56	136548	32794	6927	24621	107829	239046	27464	116940	23764	1906	20562	8217	1793	658	-46	4519	0.13951	4.73423	2.50237	-15480	-36273
21IWH18	2022-04-14-21IWH18-mz4-mantle-mY	4	Medium Y mantle	1681	21.6	643	5599	102	1921	-58	139324	27867	4350	23838	114761	247807	27834	117352	23022	1746	18494	7658	1782	441	-31	3398	0.144361	6.40621	2.41499	12464	-20235
21IWH18	2022-04-15-21IWH18-m4-loY-rim	4	Low Y rim	1487	134.5	433	2450	136	8343	84	126391	28970	749	10910	114395	252424	28999	124610	24913	1849	20462	5988	795	393	3	2170	0.132826	38.6782	3.41717	12459	-20216
21IWH18	2022-04-15-21IWH18-m25-core-hiYloTh	25	Medium Y core	1676	15.7	675	2490	38	1089	-30	140702	7478	6291	27659	113382	254266	29086	119630	25827	2423	20830	9114	2103	397	-71	2348	0.167933	1.18868	2.28549	-6646	-24275
21IWH18	2022-04-15-21IWH18-m25-core-loY-rim	25	Low Y rim	1423	12.1	445	1117	37	4848	36	134946	27287	670	11622	115233	258125	29972	127835	25695	1538	20222	6091	745	124	-10	1941	0.110082	40.7269	3.31998	-6650	-24280
21IWH18	2022-04-15-21IWH18-m26	26	High Y core	1740	24.2	612	4958	168	2062	-49	139723	27887	3581	21270	115014	250930	28206	119512	22822	2520	17925	7204	1672	371	-47	3305	0.21591	7.78749	2.4882	-2391	-21908
Reference material
Moacyr	-	-	-	511	3	-	2951	49	6907	31	131062	61411	1042	12612	130730	261830	27182	98125	16000	1029	8241	2354	420	402	321	1479				2824	-13660
Moacyr	-	-	-	504	5.3	-	2855	53	6932	-23	130977	60840	931	12955	132066	259702	30091	96955	17986	706	7879	1086	2668	171	400	1448				2700	-13720
Moacyr	-	-	-	507	4.2	-	2924	32	6982	-96	132075	61054	962	13125	130924	260767	30438	97285	18302	373	7628	1168	2813	261	395	1463				2648	-13911
Moacyr	-	-	-	502	3.4	-	2899	55	6790	-38	130138	61264	977	12962	130376	259063	30220	97218	18371	533	7975	1236	2762	281	366	1454				2603	-13911
Moacyr	-	-	-	510	3.9	-	2861	32	6871	-149	130227	61304	993	13090	131036	257095	30321	96920	18216	649	8013	950	2757	162	384	1459				2559	-13893
Moacyr	-	-	-	512	3.2	-	3017	50	7207	-26	132064	61112	1031	12892	129415	259688	27406	97314	16273	992	8316	2378	466	201	273	1485				2554	-13990
Weighted mean of reference material Moacyr: 508+/-3 Ma (MSWD=1.3)

## Sheet: Xenotime unknowns and reference
Sample	Analysis ID	Grain	Domain	Date (Ma)	Uncertainty (Ma)	Ca (ppm)	K (ppm)	Si (ppm)	Sr (ppm)	P (ppm)	Th (ppm)	U (ppm)	Y (ppm)	Pr (ppm)	Nd (ppm)	Sm (ppm)	Eu (ppm)	Gd (ppm)	Tb (ppm)	Dy (ppm)	Ho (ppm)	Er (ppm)	Tm (ppm)	Yb (ppm)	Pb (ppm)	Th/U	Eu/Eu*	Dy/Yb	XPos	YPos
21IWH11	2022-04-17--21IWH11-1-xt1	1	whole grain	1631	68.6	782	171	1656	-	161838	1012	4537	361814	145	3204	5850	1124	22397	6285	52340	12479	36291	5602	31755	1314	0.223055	0.032214	2.51844	17801	5822
21IWH11	2022-04-18--IWH11-1-xt3-lower-rim-BSEdark	3	low Yb rim	1367	75	576	492	18388	-	148429	2497	1771	332137	-	2089	4565	1798	22017	5563	48325	12115	33890	4993	27349	558	1.40994	0.0588357	2.69985	-13451	5598
21IWH11	2022-04-18--IWH11-1-xt2-left-core	2	whole grain	1642	27.8	692	429	3676	-	156979	549	4318	345075	213	3520	4851	1439	17795	5046	47392	12479	39263	6402	38790	1226	0.127142	0.0508098	1.86679	12779	4906
21IWH11	2022-04-18--IWH11-1-xt3-top-rim	3	overgrowth	1601	92	788	85	2058	-	154726	1322	5442	337211	17	2296	4196	1225	18335	5078	45787	11620	36005	6256	42224	1546	0.242925	0.0458172	1.65688	-13440	5623
21IWH11	2022-04-18-21IWH11-2-x2	2	overgrowth	1613	87.5	323	110	3855	-	159282	2394	3119	361694	31	973	2947	462	15611	4631	44243	12546	38647	5798	31864	1010	0.767554	0.0223454	2.12155	-3986	9322
21IWH11	2022-04-18-21IWH11-1-x2-rim	2	overgrowth	1670	15	333	104	2220	-	164411	1164	5834	373589	269	4750	6877	453	31065	8723	66928	12588	25683	2673	9493	1697	0.19952	0.0101675	10.7724	5942	1574
21IWH11	2022-04-18-21IWH11-1-x2-core	2	core	1692	19.3	353	26	1857	-	162370	1372	6562	367586	466	4824	6857	509	31612	8924	68333	13010	25364	2676	9182	1974	0.209083	0.0113416	11.3711	5938	1563
21IWH11	2022-04-17--21IWH11-1xt3	3	core	1723	25.2	643	109	1067	-	159243	710	4570	346100	210	3019	4216	329	15772	4561	44410	12133	40584	7015	45234	1382	0.155361	0.0132359	1.50012	-13445	5614
21IWH07	2022-04-17-21IWH7-x2	2	rim	1671	56.6	730	-	3027	-	154813	4845	8933	323097	-	2835	6282	1420	39105	10288	74602	14571	33025	4496	21685	2895	0.542371	0.0297217	5.25654	-13680	-31184
21IWH07	2022-04-13-21IWH7-xt4	4	core	1754	17	680	-	2065	-	160781	2218	7408	336592	930	6712	6956	2524	41927	11299	79078	14447	31771	3711	17786	2384	0.299406	0.0484857	6.79339	-12661	-1241
21IWH07	2022-04-13-21IWH7-xt4-mantle-mYb	4	core	1734	17.7	1039	69	1563	-	161811	1309	9358	350776	909	6483	6898	2789	38380	10272	73634	13935	32957	4138	21432	2847	0.13988	0.0562322	5.24958	-12685	-1241
21IWH07	2022-04-13-21IWH7-xt5-core-loYb	5	core	1722	27.3	768	273	3264	-	159486	8208	9663	347054	139	3190	7035	2658	42659	11782	81872	14439	32550	3654	18312	3465	0.849426	0.0503348	6.83139	-13890	-1539
21IWH07	2022-04-13-21IWH7-xt5-left-hiYb	5	rim	1639	55.9	2160	204	817	-	163681	1100	5298	371290	12	3707	6353	1827	31073	8813	66540	13686	34618	4624	25693	1541	0.207626	0.0426588	3.9571	-13902	-1536
21IWH18	2022-04-16-21IWH18-x7	7	rim	1695	21.9	504	-	2795	-	167934	1730	9617	384527	81	4054	6196	1280	23346	6135	54174	12643	35239	4287	20162	2864	0.17989	0.034914	4.1055	-2407	-21911
21IWH18	2022-04-15-21IWH18-x1-core	1	whole grain	1408	9.6	458	120	1611	-	169149	278	3002	401867	-	169	1048	331	8566	3934	48380	14038	43930	6335	38298	704	0.0926049	0.0362418	1.93019	19332	-19211
21IWH18	2022-04-15-21IWH18-x6	6	whole grain	1345	18.8	465	71	1731	-	168375	137	2891	391725	-	109	929	366	8042	3700	45213	13517	45539	7155	46769	634	0.0473884	0.0439281	1.47712	15193	-21577
21IWH18	2022-04-17-21IWH18-x4	4	whole grain	1391	44.6	311	174	1497	-	169282	257	2345	388552	-	507	2023	502	10801	4175	47990	14066	47062	7308	46005	547	0.109595	0.035231	1.59388	19117	-21381
21IWH18	2022-04-17-21IWH18-x7	7	core	1737	16.9	1005	49	3026	-	165899	1953	13863	371749	292	4180	6379	1004	22374	5938	51247	12686	37811	5447	31297	4221	0.140879	0.02757	2.50193	-11405	-37137
Reference material
GSC6413	25 2022-04-17--6413-Left-Grain-overnight-post	-	reference material	1005	3.2	209	1	3657	-	163005	2207	12848	379932	59	370	1641	451	10657	3974	39665	11001	36981	7001	48206	2099	0.171778	0.0353798	1.25723	16143	-14154
GSC6413	12 2022-04-17--6413-Left-Grain-overnight-post	-	reference material	1008	2.2	241	-1	3539	-	157300	2307	13223	360955	-25	384	1698	444	10574	3897	39518	11112	36891	7008	47883	2168	0.174469	0.0343752	1.26102	16147	-14140
GSC6413	2022-04-06--6413-Left-Grain-overnight-pre	-	reference material	1009	4.5	247	-5	3461	-	166235	2173	12496	394295	-209	317	1541	367	10469	3772	39183	10662	36531	6553	47300	2049	0.173896	0.0299753	1.26574	16181	-14000
GSC6413	2022-04-16--6413-Left-Grain-overnight-post	-	reference material	1001	5.8	232	6	3551	-	165769	2241	12828	392611	-86	302	1624	417	10611	3913	39580	10972	36969	6575	48074	2086	0.174696	0.0329546	1.25798	16186	-14036
Weighted mean of reference material GSC6413: 1007+/-3 Ma (MSWD=0.6)
